# Supplementary material
Source: publisher site journal article supplement (https://www.dovepress.com/article/563779)
Supplement: Supplementary file 1 [file 563779_Combined%20Supplementary%20Material.docx]

**Supplementary Figure**

**
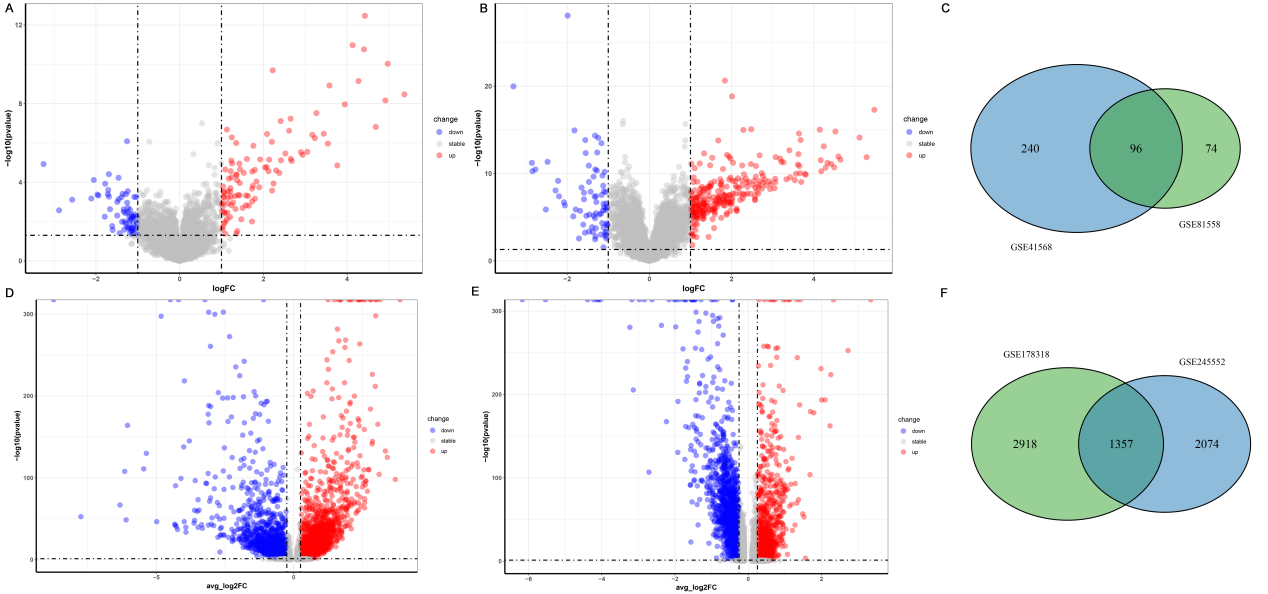
**

**Supplementary Figure 1 Identification of overlapping DEGs.**The volcano plot in the GSE81558 (**A**) and GSE41568 **(B)** dataset. **(C)** The overlapping DEGs between GSE81558 dataset and GSE41568 dataset. The volcano plot in the GSE178318 (**D**) and GSE245552 **(E)** dataset. **(F)** The overlapping DEGs between GSE81558 dataset and GSE245552 dataset.

**
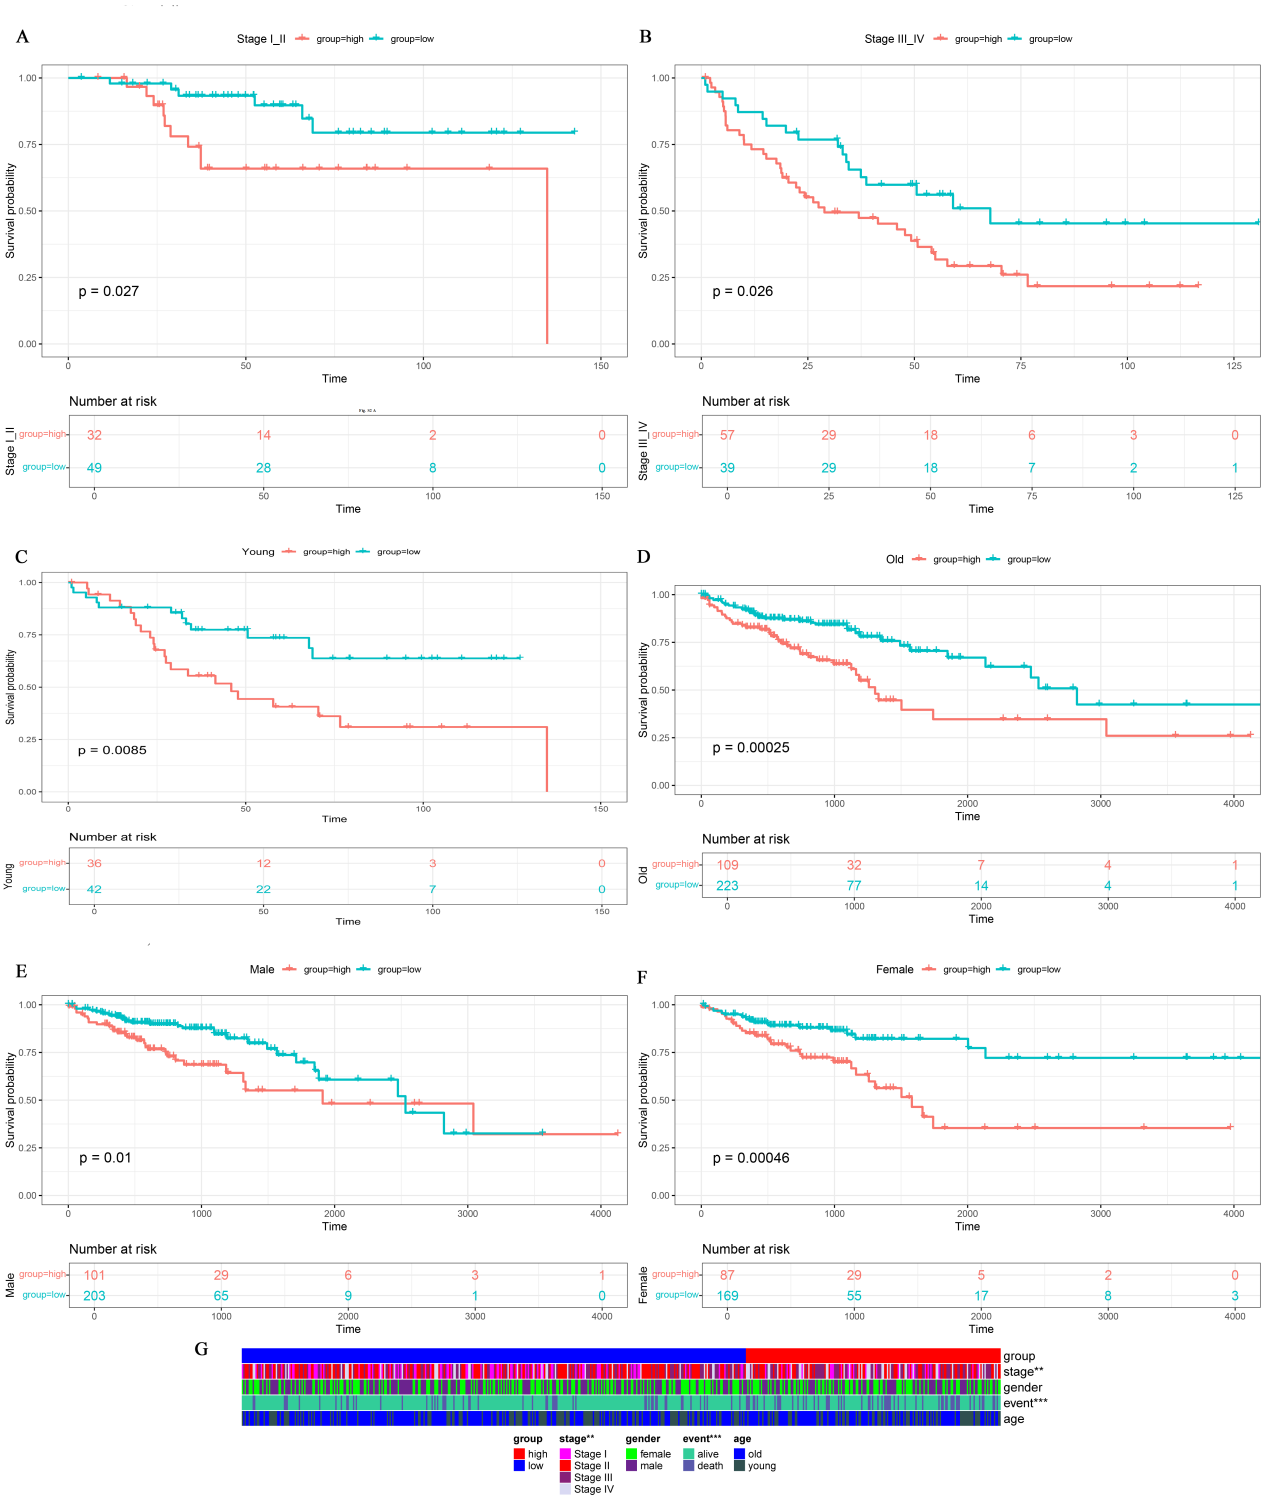
**

**Supplementary Figure 2 Correlations between the risk score and clinicopathological characteristics of CRC patients.** K-M survival analysis in CRC patients in validation set stratified by tumor stage (**A, B**), age (**C, D**) and sex (**E, F**). (**G**) Strip chart displaying the relationships between clinical characteristics between the high- and low-risk groups in training set. **p < 0.01, ***p < 0.001.


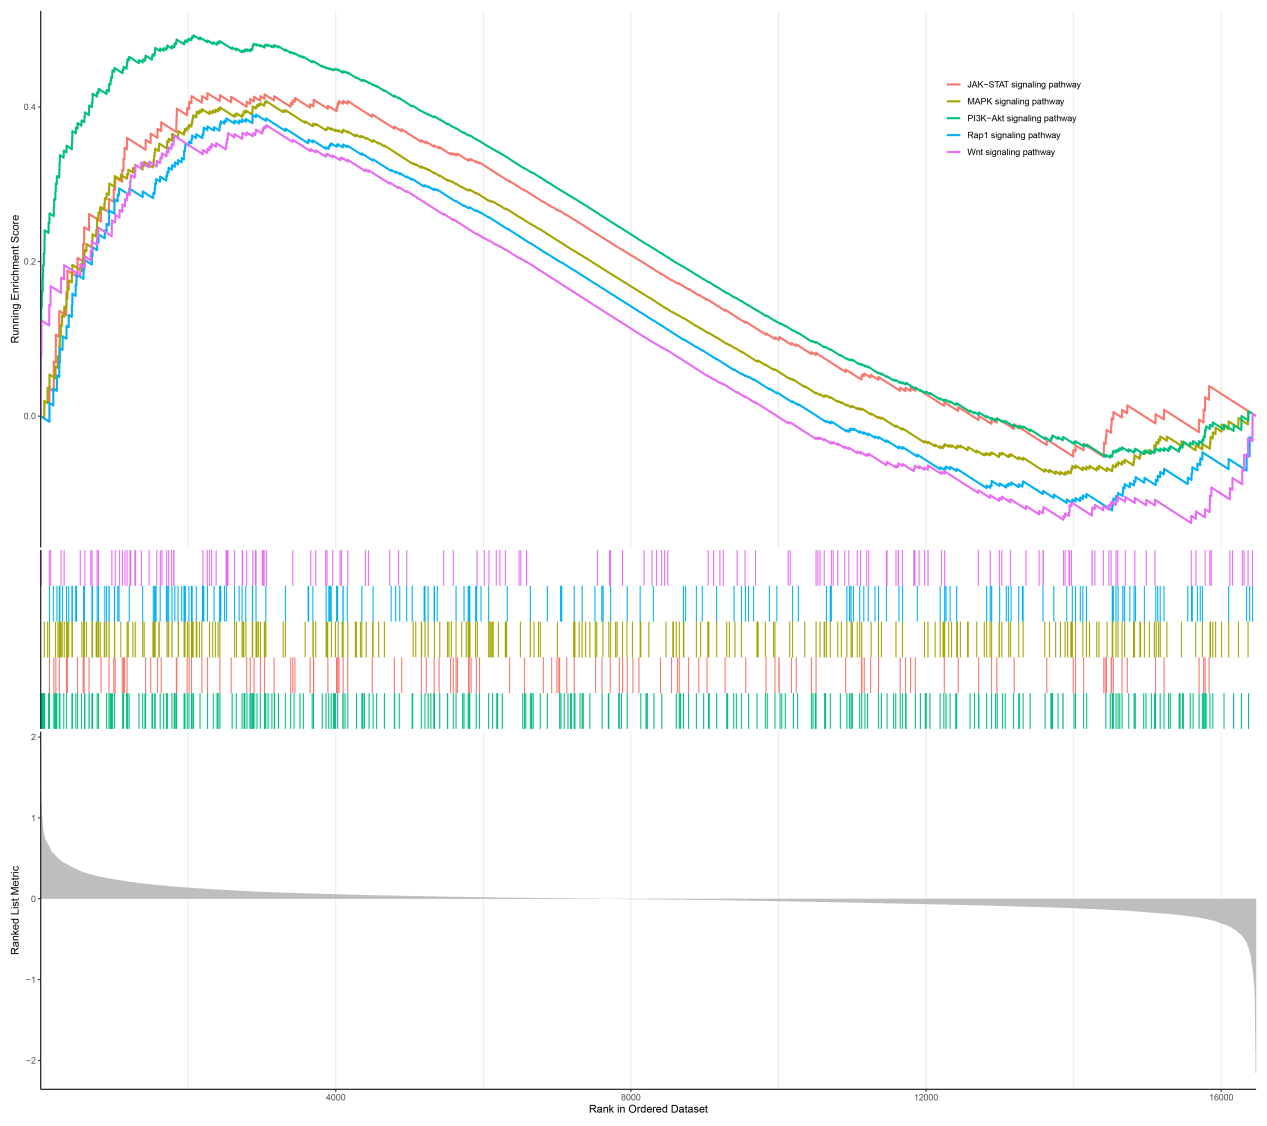


**Supplementary Figure 3 Identification of potential molecular mechanism pathways by GSEA analysis.** Significantly enriched molecular mechanism pathways in the high risk group.


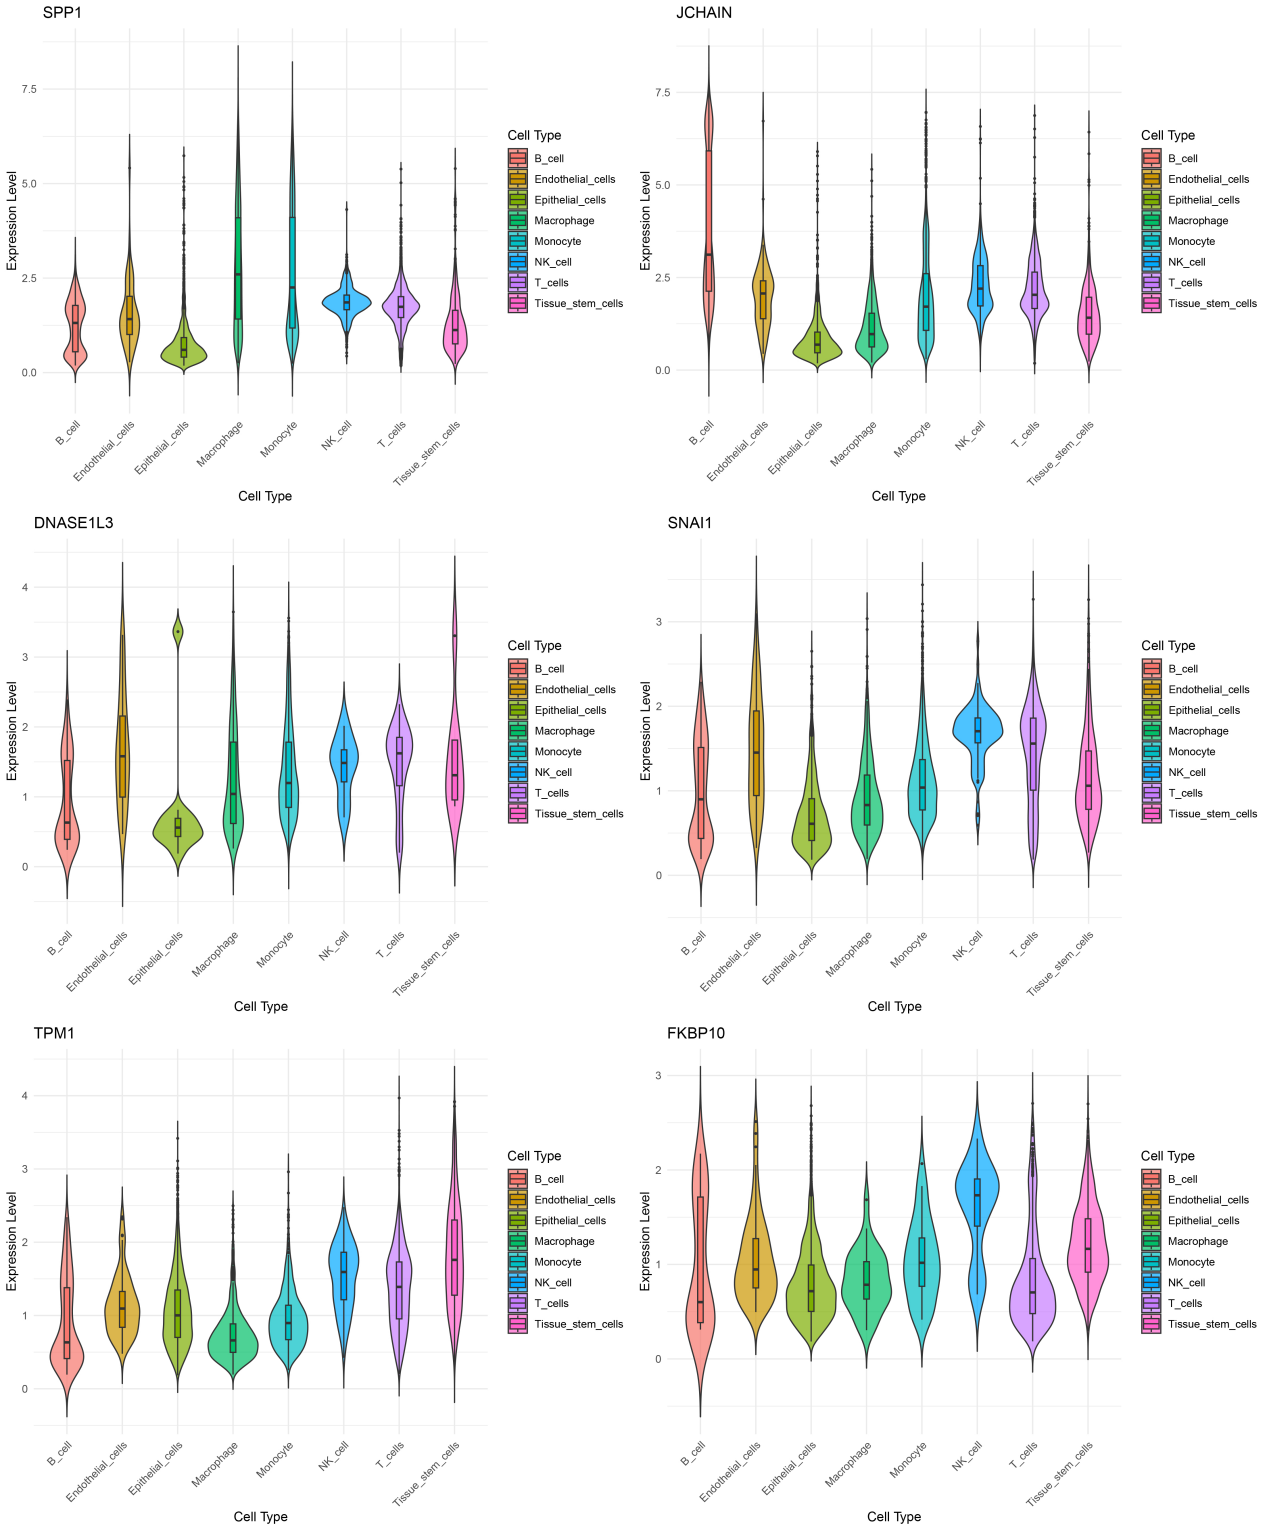


**Supplementary Figure 4 Differential expression of key gens across different cell types.** Differential expression of six key genes across different cell types.


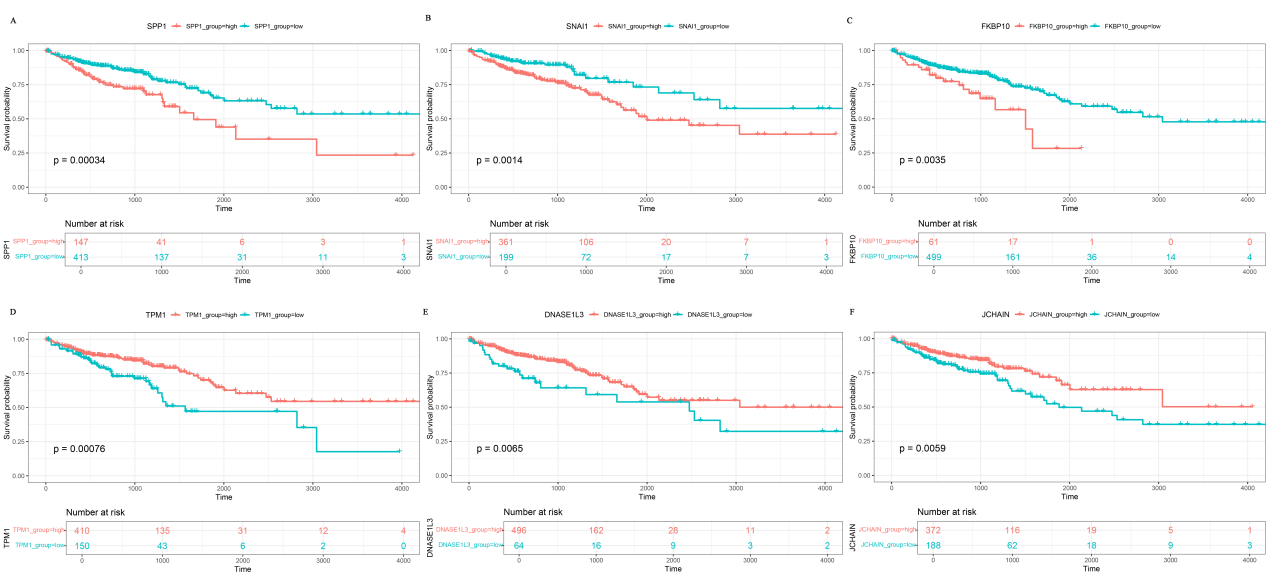


**Supplementary Figure 5 The associated with OS of key gens between high- and low-expression group.** K-M survival analysis of SPP1, SNAL1, FKBP10, TPM1, DNASE1L3 and JCHAIN in CRC patients.

**Supplementary Table**

| **Supplementary file 1.The clinicopathological information in TCGA and GSE17536.** | | | | | | | | | | | | | |
| --- | --- | --- | --- | --- | --- | --- | --- | --- | --- | --- | --- | --- | --- |
| **The clinicopathological information in TCGA** | | | | | |  |  | **The clinicopathological information in GSE17536** | | | | | |
| ID | stage | gender | event | age | time |  |  | ID | age | gender | stage | time | event |
| TCGA.3L.AA1B | Stage I | female | 0 | 61 | 475 |  |  | GSM437093 | 73 | male | 1 | 142.55 | 0 |
| TCGA.4N.A93T | Stage IIIB | male | 0 | 67 | 146 |  |  | GSM437094 | 63 | male | 1 | 122.72 | 0 |
| TCGA.4T.AA8H | Stage IIA | female | 0 | 42 | 385 |  |  | GSM437095 | 51 | male | 1 | 28.96 | 1 |
| TCGA.5M.AAT4 | Stage IV | male | 1 | 74 | 49 |  |  | GSM437096 | 56 | female | 1 | 119.21 | 0 |
| TCGA.5M.AAT6 | Stage IV | female | 1 | 40 | 290 |  |  | GSM437097 | 50 | male | 1 | 59.53 | 0 |
| TCGA.5M.AATE | Stage IIA | male | 0 | 76 | 1200 |  |  | GSM437098 | 63 | female | 1 | 68.81 | 1 |
| TCGA.A6.2671 | Stage IV | male | 1 | 85 | 1331 |  |  | GSM437099 | 66 | male | 1 | 82.29 | 0 |
| TCGA.A6.2672 | Stage IIIB | female | 0 | 82 | 1419 |  |  | GSM437100 | 63 | male | 1 | 110.82 | 0 |
| TCGA.A6.2674 | Stage IV | male | 0 | 71 | 1331 |  |  | GSM437101 | 88 | male | 1 | 65.88 | 1 |
| TCGA.A6.2675 | Stage IIA | male | 0 | 78 | 1321 |  |  | GSM437102 | 66 | male | 1 | 84.13 | 0 |
| TCGA.A6.2676 | Stage IIB | female | 1 | 75 | 1305 |  |  | GSM437103 | 80 | female | 1 | 16.47 | 1 |
| TCGA.A6.2677 | Stage IIIC | female | 1 | 68 | 740 |  |  | GSM437104 | 62 | male | 1 | 89.75 | 0 |
| TCGA.A6.2678 | Stage IIIB | female | 0 | 43 | 1286 |  |  | GSM437105 | 82 | male | 1 | 76.07 | 0 |
| TCGA.A6.2679 | Stage IIB | female | 0 | 73 | 1366 |  |  | GSM437106 | 78 | female | 1 | 67.82 | 0 |
| TCGA.A6.2680 | Stage II | female | 0 | 72 | 1068 |  |  | GSM437107 | 76 | male | 1 | 52.24 | 0 |
| TCGA.A6.2681 | Stage IIA | female | 0 | 73 | 1387 |  |  | GSM437108 | 87 | female | 1 | 64.1 | 0 |
| TCGA.A6.2682 | Stage IV | male | 1 | 70 | 424 |  |  | GSM437109 | 74 | female | 1 | 55.13 | 0 |
| TCGA.A6.2683 | Stage IV | female | 1 | 57 | 504 |  |  | GSM437110 | 55 | male | 1 | 57.79 | 0 |
| TCGA.A6.2684 | Stage I | female | 0 | 75 | 1127 |  |  | GSM437111 | 71 | male | 1 | 50.1 | 0 |
| TCGA.A6.2685 | Stage IIA | female | 0 | 48 | 1133 |  |  | GSM437112 | 86 | female | 1 | 43.79 | 0 |
| TCGA.A6.2686 | Stage IIA | female | 1 | 81 | 1126 |  |  | GSM437113 | 58 | male | 1 | 30.27 | 0 |
| TCGA.A6.3807 | Stage IIIC | female | 0 | 53 | 1054 |  |  | GSM437114 | 78 | male | 1 | 3.64 | 0 |
| TCGA.A6.3808 | Stage IIA | male | 0 | 73 | 1014 |  |  | GSM437115 | 57 | male | 1 | 36.59 | 0 |
| TCGA.A6.3809 | Stage IIB | female | 0 | 71 | 996 |  |  | GSM437116 | 81 | male | 1 | 20.02 | 0 |
| TCGA.A6.3810 | Stage IIA | male | 0 | 62 | 1111 |  |  | GSM437117 | 74 | female | 2 | 118.58 | 0 |
| TCGA.A6.4105 | Stage IIA | male | 1 | 79 | 442 |  |  | GSM437118 | 77 | female | 2 | 55.33 | 0 |
| TCGA.A6.4107 | Stage IIIB | female | 0 | 57 | 987 |  |  | GSM437119 | 41 | male | 2 | 134.86 | 1 |
| TCGA.A6.5656 | Stage I | male | 0 | 74 | 1001 |  |  | GSM437120 | 43 | female | 2 | 127.29 | 0 |
| TCGA.A6.5657 | Stage IIIB | male | 0 | 65 | 962 |  |  | GSM437121 | 51 | female | 2 | 120.62 | 0 |
| TCGA.A6.5659 | Stage I | male | 0 | 82 | 926 |  |  | GSM437122 | 70 | male | 2 | 106.94 | 0 |
| TCGA.A6.5660 | Stage IIIC | male | 0 | 73 | 888 |  |  | GSM437123 | 78 | female | 2 | 11.7 | 1 |
| TCGA.A6.5661 | Stage IIA | female | 0 | 80 | 1020 |  |  | GSM437124 | 80 | male | 2 | 28.79 | 1 |
| TCGA.A6.5662 | Stage IVA | male | 0 | 46 | 718 |  |  | GSM437125 | 66 | male | 2 | 26.82 | 1 |
| TCGA.A6.5664 | Stage IIIC | male | 0 | 80 | 672 |  |  | GSM437126 | 76 | female | 2 | 52.5 | 1 |
| TCGA.A6.5665 | Stage IIA | female | 0 | 84 | 671 |  |  | GSM437127 | 58 | female | 2 | 24.03 | 1 |
| TCGA.A6.5666 | Stage IIC | male | 0 | 78 | 995 |  |  | GSM437128 | 74 | male | 2 | 88.99 | 0 |
| TCGA.A6.5667 | Stage IIIB | female | 0 | 40 | 887 |  |  | GSM437129 | 49 | male | 2 | 102.44 | 0 |
| TCGA.A6.6137 | Stage IIIB | male | 0 | 55 | 824 |  |  | GSM437130 | 54 | female | 2 | 33.73 | 1 |
| TCGA.A6.6138 | Stage I | male | 0 | 61 | 685 |  |  | GSM437131 | 71 | female | 2 | 85.28 | 0 |
| TCGA.A6.6140 | Stage IIA | male | 0 | 62 | 734 |  |  | GSM437132 | 79 | female | 2 | 26.53 | 0 |
| TCGA.A6.6141 | Stage IIA | male | 0 | 31 | 255 |  |  | GSM437133 | 75 | female | 2 | 37.31 | 1 |
| TCGA.A6.6142 | Stage IVA | female | 0 | 56 | 763 |  |  | GSM437134 | 74 | female | 2 | 86.43 | 0 |
| TCGA.A6.6648 | Stage IVA | male | 0 | 56 | 766 |  |  | GSM437135 | 74 | female | 2 | 55.92 | 0 |
| TCGA.A6.6649 | Stage IIIB | male | 0 | 66 | 735 |  |  | GSM437136 | 83 | female | 2 | 70.65 | 0 |
| TCGA.A6.6650 | Stage IIA | female | 0 | 69 | 627 |  |  | GSM437137 | 73 | male | 2 | 76.04 | 0 |
| TCGA.A6.6651 | Stage IIIB | female | 0 | 55 | 662 |  |  | GSM437138 | 57 | female | 2 | 79.13 | 0 |
| TCGA.A6.6652 | Stage IVA | male | 0 | 59 | 751 |  |  | GSM437139 | 65 | female | 2 | 83.99 | 0 |
| TCGA.A6.6653 | Stage I | male | 0 | 82 | 742 |  |  | GSM437140 | 86 | female | 2 | 80.25 | 0 |
| TCGA.A6.6654 | Stage IIIB | female | 0 | 65 | 726 |  |  | GSM437141 | 89 | female | 2 | 40.6 | 0 |
| TCGA.A6.6780 | Stage IIA | male | 0 | 74 | 612 |  |  | GSM437142 | 56 | female | 2 | 95.37 | 0 |
| TCGA.A6.6781 | Stage IIIC | male | 0 | 43 | 598 |  |  | GSM437143 | 86 | female | 2 | 31.06 | 1 |
| TCGA.A6.6782 | Stage IIB | male | 0 | 82 | 617 |  |  | GSM437144 | 71 | male | 2 | 37.31 | 1 |
| TCGA.A6.A565 | Stage IIIC | female | 1 | 34 | 494 |  |  | GSM437145 | 78 | female | 2 | 22.02 | 1 |
| TCGA.A6.A566 | Stage IIIB | female | 1 | 55 | 758 |  |  | GSM437146 | 76 | male | 2 | 63.25 | 0 |
| TCGA.A6.A567 | Stage IV | male | 1 | 56 | 1881 |  |  | GSM437147 | 66 | female | 2 | 34.09 | 0 |
| TCGA.A6.A56B | Stage IIIB | male | 1 | 57 | 1711 |  |  | GSM437148 | 65 | female | 2 | 52.14 | 0 |
| TCGA.A6.A5ZU | Stage IIIB | male | 0 | 59 | 293 |  |  | GSM437149 | 74 | female | 2 | 66.04 | 0 |
| TCGA.AA.3488 | Stage IV | male | 1 | 58 | 153 |  |  | GSM437150 | 67 | male | 2 | 59.96 | 0 |
| TCGA.AA.3489 | Stage II | male | 1 | 75 | 214 |  |  | GSM437151 | 56 | male | 2 | 47.86 | 0 |
| TCGA.AA.3492 | Stage II | female | 1 | 90 | 1 |  |  | GSM437152 | 48 | female | 2 | 58.45 | 0 |
| TCGA.AA.3494 | Stage IV | male | 0 | 55 | 31 |  |  | GSM437153 | 68 | male | 2 | 45.99 | 0 |
| TCGA.AA.3495 | Stage I | male | 0 | 79 | 1127 |  |  | GSM437154 | 71 | male | 2 | 60.42 | 0 |
| TCGA.AA.3496 | Stage II | female | 0 | 83 | 31 |  |  | GSM437155 | 38 | female | 2 | 37.67 | 0 |
| TCGA.AA.3502 | Stage I | male | 0 | 73 | 1065 |  |  | GSM437156 | 73 | male | 2 | 15.71 | 0 |
| TCGA.AA.3506 | Stage I | male | 0 | 77 | 1765 |  |  | GSM437157 | 59 | female | 2 | 39.25 | 0 |
| TCGA.AA.3509 | Stage II | female | 0 | 54 | 1915 |  |  | GSM437158 | 76 | female | 2 | 49.87 | 0 |
| TCGA.AA.3510 | Stage II | male | 0 | 70 | 1946 |  |  | GSM437159 | 71 | male | 2 | 25.24 | 0 |
| TCGA.AA.3511 | Stage II | male | 0 | 64 | 212 |  |  | GSM437160 | 58 | male | 2 | 44.97 | 0 |
| TCGA.AA.3514 | Stage I | female | 0 | 81 | 31 |  |  | GSM437161 | 60 | male | 2 | 35.9 | 0 |
| TCGA.AA.3516 | Stage III | female | 1 | 74 | 396 |  |  | GSM437162 | 71 | male | 2 | 26.66 | 0 |
| TCGA.AA.3517 | Stage IIA | male | 0 | 60 | 1186 |  |  | GSM437163 | 64 | female | 2 | 36.78 | 0 |
| TCGA.AA.3518 | Stage IIA | female | 0 | 81 | 31 |  |  | GSM437164 | 84 | female | 2 | 41.52 | 0 |
| TCGA.AA.3519 | Stage III | male | 0 | 63 | 276 |  |  | GSM437165 | 87 | female | 2 | 22.22 | 0 |
| TCGA.AA.3520 | Stage II | female | 0 | 86 | 731 |  |  | GSM437166 | 51 | male | 2 | 33.2 | 0 |
| TCGA.AA.3522 | Stage IIA | male | 0 | 67 | 1127 |  |  | GSM437167 | 69 | male | 2 | 39.68 | 0 |
| TCGA.AA.3524 | Stage II | male | 0 | 85 | 1096 |  |  | GSM437168 | 78 | male | 2 | 25.61 | 0 |
| TCGA.AA.3525 | Stage IIIB | male | 0 | 90 | 1 |  |  | GSM437169 | 65 | female | 2 | 83.99 | 0 |
| TCGA.AA.3526 | Stage I | male | 0 | 57 | 580 |  |  | GSM437170 | 54 | male | 2 | 15.05 | 0 |
| TCGA.AA.3530 | Stage I | male | 0 | 80 | 580 |  |  | GSM437171 | 40 | female | 2 | 8.38 | 0 |
| TCGA.AA.3531 | Stage IIA | female | 0 | 75 | 1035 |  |  | GSM437172 | 68 | male | 2 | 18.18 | 0 |
| TCGA.AA.3532 | Stage IIA | male | 0 | 63 | 882 |  |  | GSM437173 | 52 | female | 2 | 27.15 | 1 |
| TCGA.AA.3534 | Stage IIA | female | 0 | 78 | 882 |  |  | GSM437174 | 46 | male | 3 | 24.26 | 1 |
| TCGA.AA.3538 | Stage I | female | 0 | 54 | 791 |  |  | GSM437175 | 39 | male | 3 | 105.17 | 0 |
| TCGA.AA.3542 | Stage IIIC | male | 0 | 69 | 395 |  |  | GSM437176 | 38 | male | 3 | 11.76 | 1 |
| TCGA.AA.3543 | Stage I | male | 0 | 84 | 30 |  |  | GSM437177 | 26 | male | 3 | 70.45 | 1 |
| TCGA.AA.3544 | Stage I | male | 0 | 68 | 426 |  |  | GSM437178 | 71 | female | 3 | 95.07 | 0 |
| TCGA.AA.3548 | Stage IIIC | female | 0 | 71 | 1034 |  |  | GSM437179 | 64 | female | 3 | 112.33 | 0 |
| TCGA.AA.3549 | Stage I | male | 0 | 69 | 639 |  |  | GSM437180 | 53 | male | 3 | 27.51 | 1 |
| TCGA.AA.3552 | Stage IIIC | male | 1 | 85 | 396 |  |  | GSM437181 | 53 | female | 3 | 45.92 | 1 |
| TCGA.AA.3553 | Stage I | female | 0 | 61 | 730 |  |  | GSM437182 | 92 | female | 3 | 54.04 | 1 |
| TCGA.AA.3554 | Stage IIA | female | 0 | 62 | 546 |  |  | GSM437183 | 60 | male | 3 | 103.98 | 0 |
| TCGA.AA.3555 | Stage IIA | female | 0 | 81 | 911 |  |  | GSM437184 | 74 | male | 3 | 6.11 | 1 |
| TCGA.AA.3556 | Stage I | male | 0 | 78 | 700 |  |  | GSM437185 | 48 | female | 3 | 99.51 | 0 |
| TCGA.AA.3560 | Stage IIIC | female | 0 | 72 | 608 |  |  | GSM437186 | 63 | male | 3 | 20.44 | 1 |
| TCGA.AA.3561 | Stage IIA | male | 0 | 72 | 424 |  |  | GSM437187 | 58 | male | 3 | 76.6 | 1 |
| TCGA.AA.3562 | Stage IIIC | male | 0 | 82 | 608 |  |  | GSM437188 | 75 | male | 3 | 10.02 | 1 |
| TCGA.AA.3655 | Stage II | male | 0 | 68 | 1856 |  |  | GSM437189 | 63 | male | 3 | 41.45 | 1 |
| TCGA.AA.3660 | Stage II | female | 0 | 51 | 2375 |  |  | GSM437190 | 46 | male | 3 | 96.26 | 0 |
| TCGA.AA.3662 | Stage IV | female | 0 | 80 | 184 |  |  | GSM437191 | 71 | female | 3 | 85.61 | 0 |
| TCGA.AA.3663 | Stage II | male | 0 | 42 | 212 |  |  | GSM437192 | 63 | male | 3 | 78.87 | 0 |
| TCGA.AA.3664 | Stage II | female | 0 | 74 | 1643 |  |  | GSM437193 | 87 | female | 3 | 22.25 | 1 |
| TCGA.AA.3666 | Stage III | male | 1 | 68 | 61 |  |  | GSM437194 | 63 | male | 3 | 74.53 | 0 |
| TCGA.AA.3667 | Stage I | female | 0 | 36 | 426 |  |  | GSM437195 | 87 | male | 3 | 59.07 | 1 |
| TCGA.AA.3673 | Stage II | female | 0 | 53 | 1522 |  |  | GSM437196 | 30 | male | 3 | 47.8 | 1 |
| TCGA.AA.3675 | Stage II | male | 0 | 84 | 1431 |  |  | GSM437197 | 83 | female | 3 | 5.68 | 1 |
| TCGA.AA.3678 | Stage III | female | 0 | 60 | 1430 |  |  | GSM437198 | 55 | male | 3 | 79.39 | 0 |
| TCGA.AA.3679 | Stage IV | male | 0 | 59 | 457 |  |  | GSM437199 | 66 | male | 3 | 74.07 | 0 |
| TCGA.AA.3680 | Stage IV | female | 1 | 67 | 335 |  |  | GSM437200 | 69 | male | 3 | 50.76 | 1 |
| TCGA.AA.3681 | Stage III | female | 0 | 77 | 182 |  |  | GSM437201 | 64 | female | 3 | 67.82 | 1 |
| TCGA.AA.3685 | Stage II | male | 0 | 69 | 1127 |  |  | GSM437202 | 62 | male | 3 | 70.84 | 0 |
| TCGA.AA.3688 | Stage IV | male | 0 | 80 | 578 |  |  | GSM437203 | 67 | female | 3 | 50.59 | 0 |
| TCGA.AA.3692 | Stage IV | female | 1 | 47 | 1095 |  |  | GSM437204 | 57 | male | 3 | 34.58 | 1 |
| TCGA.AA.3696 | Stage IV | female | 1 | 75 | 153 |  |  | GSM437205 | 73 | female | 3 | 38.72 | 1 |
| TCGA.AA.3697 | Stage II | male | 0 | 77 | 2587 |  |  | GSM437206 | 83 | female | 3 | 54.9 | 1 |
| TCGA.AA.3710 | Stage IIA | female | 0 | 80 | 821 |  |  | GSM437207 | 65 | female | 3 | 67.92 | 0 |
| TCGA.AA.3713 | Stage IV | male | 0 | 68 | 579 |  |  | GSM437208 | 63 | female | 3 | 58.45 | 0 |
| TCGA.AA.3715 | Stage II | male | 1 | 77 | 579 |  |  | GSM437209 | 69 | male | 3 | 59.34 | 0 |
| TCGA.AA.3811 | Stage III | female | 1 | 84 | 306 |  |  | GSM437210 | 71 | female | 3 | 54.54 | 0 |
| TCGA.AA.3812 | Stage IIA | female | 0 | 82 | 1066 |  |  | GSM437211 | 51 | female | 3 | 19.03 | 1 |
| TCGA.AA.3815 | Stage IIA | female | 0 | 65 | 1005 |  |  | GSM437212 | 78 | female | 3 | 26.26 | 1 |
| TCGA.AA.3818 | Stage IIA | female | 1 | 78 | 30 |  |  | GSM437213 | 72 | male | 3 | 52.86 | 0 |
| TCGA.AA.3819 | Stage IIA | female | 0 | 41 | 761 |  |  | GSM437214 | 46 | male | 3 | 32.05 | 1 |
| TCGA.AA.3821 | Stage I | female | 0 | 81 | 31 |  |  | GSM437215 | 67 | male | 3 | 55.95 | 0 |
| TCGA.AA.3831 | Stage IIA | male | 0 | 66 | 547 |  |  | GSM437216 | 67 | male | 3 | 56.67 | 0 |
| TCGA.AA.3833 | Stage IIA | female | 0 | 63 | 485 |  |  | GSM437217 | 26 | male | 3 | 50.43 | 0 |
| TCGA.AA.3837 | Stage IIA | male | 0 | 67 | 1186 |  |  | GSM437218 | 78 | female | 3 | 4.24 | 1 |
| TCGA.AA.3841 | Stage IIA | male | 0 | 66 | 1124 |  |  | GSM437219 | 71 | female | 3 | 49.11 | 0 |
| TCGA.AA.3842 | Stage IIIA | male | 0 | 51 | 1126 |  |  | GSM437220 | 60 | female | 3 | 49.57 | 0 |
| TCGA.AA.3844 | Stage IIIC | female | 0 | 78 | 454 |  |  | GSM437221 | 46 | male | 3 | 50.49 | 0 |
| TCGA.AA.3846 | Stage IIA | female | 0 | 74 | 518 |  |  | GSM437222 | 41 | male | 3 | 63.05 | 0 |
| TCGA.AA.3848 | Stage IIIC | female | 1 | 82 | 306 |  |  | GSM437223 | 75 | female | 3 | 49.24 | 1 |
| TCGA.AA.3851 | Stage IIA | male | 0 | 74 | 1006 |  |  | GSM437224 | 54 | male | 3 | 0.92 | 0 |
| TCGA.AA.3854 | Stage I | female | 0 | 71 | 1096 |  |  | GSM437225 | 78 | female | 3 | 31.36 | 0 |
| TCGA.AA.3855 | Stage I | male | 0 | 72 | 975 |  |  | GSM437226 | 61 | female | 3 | 40.3 | 0 |
| TCGA.AA.3856 | Stage IIA | male | 0 | 59 | 30 |  |  | GSM437227 | 74 | male | 3 | 116.64 | 0 |
| TCGA.AA.3858 | Stage I | male | 0 | 67 | 945 |  |  | GSM437228 | 79 | female | 3 | 31.92 | 0 |
| TCGA.AA.3860 | Stage IIIB | female | 0 | 53 | 945 |  |  | GSM437229 | 81 | female | 3 | 19.98 | 0 |
| TCGA.AA.3861 | Stage IIA | male | 0 | 72 | 914 |  |  | GSM437230 | 62 | female | 3 | 24.62 | 0 |
| TCGA.AA.3862 | Stage IIA | male | 0 | 82 | 914 |  |  | GSM437231 | 64 | male | 4 | 18.54 | 1 |
| TCGA.AA.3864 | Stage II | male | 0 | 71 | 1612 |  |  | GSM437232 | 72 | female | 4 | 130.75 | 0 |
| TCGA.AA.3866 | Stage I | female | 0 | 78 | 518 |  |  | GSM437233 | 59 | female | 4 | 17.62 | 1 |
| TCGA.AA.3867 | Stage IV | male | 0 | 74 | 731 |  |  | GSM437234 | 46 | male | 4 | 5.32 | 1 |
| TCGA.AA.3869 | Stage IV | male | 1 | 76 | 822 |  |  | GSM437235 | 69 | male | 4 | 2.36 | 1 |
| TCGA.AA.3870 | Stage IV | female | 0 | 71 | 912 |  |  | GSM437236 | 73 | male | 4 | 5.72 | 1 |
| TCGA.AA.3875 | Stage I | female | 0 | 78 | 549 |  |  | GSM437237 | 66 | male | 4 | 15.28 | 1 |
| TCGA.AA.3877 | Stage I | female | 0 | 83 | 943 |  |  | GSM437238 | 54 | male | 4 | 95.07 | 0 |
| TCGA.AA.3930 | Stage IV | male | 1 | 66 | 61 |  |  | GSM437239 | 88 | male | 4 | 4.96 | 1 |
| TCGA.AA.3939 | Stage IIA | male | 0 | 83 | 395 |  |  | GSM437240 | 58 | male | 4 | 28.89 | 1 |
| TCGA.AA.3941 | Stage IVA | female | 0 | 84 | 730 |  |  | GSM437241 | 82 | female | 4 | 3.25 | 1 |
| TCGA.AA.3947 | Stage IIB | female | 0 | 60 | 1004 |  |  | GSM437242 | 58 | female | 4 | 0.92 | 1 |
| TCGA.AA.3949 | Stage IIIB | female | 0 | 87 | 791 |  |  | GSM437243 | 69 | male | 4 | 18.77 | 1 |
| TCGA.AA.3950 | Stage IIA | female | 0 | 79 | 730 |  |  | GSM437244 | 51 | male | 4 | 57.73 | 1 |
| TCGA.AA.3952 | Stage IIIC | male | 1 | 68 | 61 |  |  | GSM437245 | 70 | female | 4 | 14.39 | 1 |
| TCGA.AA.3955 | Stage IIIB | male | 0 | 38 | 638 |  |  | GSM437246 | 82 | female | 4 | 5.12 | 1 |
| TCGA.AA.3956 | Stage IIA | male | 0 | 65 | 1035 |  |  | GSM437247 | 60 | male | 4 | 4.99 | 1 |
| TCGA.AA.3966 | Stage IIA | female | 0 | 89 | 61 |  |  | GSM437248 | 52 | male | 4 | 33.17 | 1 |
| TCGA.AA.3968 | Stage I | female | 0 | 55 | 669 |  |  | GSM437249 | 59 | male | 4 | 50.53 | 1 |
| TCGA.AA.3970 | Stage IIA | male | 0 | 65 | 1096 |  |  | GSM437250 | 56 | male | 4 | 5.72 | 1 |
| TCGA.AA.3971 | Stage III | male | 0 | 58 | 489 |  |  | GSM437251 | 63 | male | 4 | 8.02 | 1 |
| TCGA.AA.3972 | Stage IV | male | 0 | 72 | 1551 |  |  | GSM437252 | 65 | female | 4 | 34.02 | 1 |
| TCGA.AA.3973 | Stage IV | male | 0 | 69 | 397 |  |  | GSM437253 | 54 | male | 4 | 1.44 | 1 |
| TCGA.AA.3975 | Stage I | male | 0 | 80 | 1036 |  |  | GSM437254 | 76 | male | 4 | 36.95 | 1 |
| TCGA.AA.3976 | Stage IIIA | male | 0 | 70 | 791 |  |  | GSM437255 | 58 | female | 4 | 60.75 | 0 |
| TCGA.AA.3979 | Stage IIA | male | 0 | 84 | 730 |  |  | GSM437256 | 69 | female | 4 | 37.44 | 1 |
| TCGA.AA.3980 | Stage I | female | 0 | 89 | 242 |  |  | GSM437257 | 42 | female | 4 | 23.07 | 1 |
| TCGA.AA.3982 | Stage IIIB | male | 0 | 75 | 822 |  |  | GSM437258 | 78 | female | 4 | 19.85 | 1 |
| TCGA.AA.3986 | Stage I | male | 0 | 73 | 580 |  |  | GSM437259 | 51 | male | 4 | 31.85 | 0 |
| TCGA.AA.3989 | Stage IV | male | 1 | 84 | 242 |  |  | GSM437260 | 63 | male | 4 | 8.61 | 1 |
| TCGA.AA.3994 | Stage IIIB | male | 0 | 69 | 822 |  |  | GSM437261 | 66 | male | 4 | 42.27 | 0 |
| TCGA.AA.A004 | Stage IIA | male | 0 | 76 | 424 |  |  | GSM437262 | 73 | male | 4 | 15.25 | 1 |
| TCGA.AA.A00A | Stage IIA | male | 0 | 80 | 1157 |  |  | GSM437263 | 62 | male | 4 | 14.56 | 1 |
| TCGA.AA.A00D | Stage I | male | 0 | 70 | 578 |  |  | GSM437264 | 82 | female | 4 | 9.96 | 1 |
| TCGA.AA.A00E | Stage IIA | male | 0 | 65 | 913 |  |  | GSM437265 | 76 | male | 4 | 8.94 | 1 |
| TCGA.AA.A00F | Stage IIIC | male | 0 | 66 | 1035 |  |  | GSM437266 | 78 | female | 4 | 32.67 | 0 |
| TCGA.AA.A00J | Stage IIIB | male | 0 | 80 | 549 |  |  | GSM437267 | 66 | female | 4 | 2.07 | 1 |
| TCGA.AA.A00K | Stage IIA | male | 0 | 79 | 549 |  |  | GSM437268 | 68 | male | 4 | 22.78 | 1 |
| TCGA.AA.A00L | Stage IIA | male | 0 | 66 | 1157 |  |  | GSM437269 | 47 | male | 4 | 22.35 | 0 |
| TCGA.AA.A00N | Stage IIB | male | 1 | 75 | 122 |  |  |  |  |  |  |  |  |
| TCGA.AA.A00O | Stage IIIC | female | 0 | 83 | 822 |  |  |  |  |  |  |  |  |
| TCGA.AA.A00Q | Stage IIIB | female | 0 | 66 | 1278 |  |  |  |  |  |  |  |  |
| TCGA.AA.A00R | Stage I | female | 0 | 64 | 30 |  |  |  |  |  |  |  |  |
| TCGA.AA.A00U | Stage IIIB | male | 0 | 50 | 518 |  |  |  |  |  |  |  |  |
| TCGA.AA.A00W | Stage I | male | 0 | 80 | 456 |  |  |  |  |  |  |  |  |
| TCGA.AA.A00Z | Stage IIA | male | 0 | 70 | 669 |  |  |  |  |  |  |  |  |
| TCGA.AA.A010 | Stage IIB | female | 0 | 46 | 1064 |  |  |  |  |  |  |  |  |
| TCGA.AA.A017 | Stage IIA | female | 0 | 57 | 457 |  |  |  |  |  |  |  |  |
| TCGA.AA.A01C | Stage IIIA | male | 0 | 75 | 457 |  |  |  |  |  |  |  |  |
| TCGA.AA.A01D | Stage IIIC | female | 1 | 47 | 334 |  |  |  |  |  |  |  |  |
| TCGA.AA.A01F | Stage IIIB | male | 0 | 72 | 974 |  |  |  |  |  |  |  |  |
| TCGA.AA.A01G | Stage IIA | male | 0 | 63 | 365 |  |  |  |  |  |  |  |  |
| TCGA.AA.A01I | Stage I | male | 0 | 76 | 943 |  |  |  |  |  |  |  |  |
| TCGA.AA.A01K | Stage IIIC | female | 0 | 74 | 943 |  |  |  |  |  |  |  |  |
| TCGA.AA.A01P | Stage III | female | 1 | 80 | 1158 |  |  |  |  |  |  |  |  |
| TCGA.AA.A01Q | Stage II | female | 0 | 48 | 31 |  |  |  |  |  |  |  |  |
| TCGA.AA.A01R | Stage III | male | 0 | 47 | 1065 |  |  |  |  |  |  |  |  |
| TCGA.AA.A01S | Stage III | female | 0 | 47 | 31 |  |  |  |  |  |  |  |  |
| TCGA.AA.A01T | Stage III | female | 0 | 63 | 1005 |  |  |  |  |  |  |  |  |
| TCGA.AA.A01V | Stage I | male | 0 | 59 | 31 |  |  |  |  |  |  |  |  |
| TCGA.AA.A01X | Stage III | female | 0 | 80 | 791 |  |  |  |  |  |  |  |  |
| TCGA.AA.A01Z | Stage II | male | 0 | 68 | 1126 |  |  |  |  |  |  |  |  |
| TCGA.AA.A024 | Stage II | male | 1 | 81 | 1188 |  |  |  |  |  |  |  |  |
| TCGA.AA.A029 | Stage II | male | 0 | 67 | 1581 |  |  |  |  |  |  |  |  |
| TCGA.AA.A02E | Stage IV | female | 1 | 82 | 90 |  |  |  |  |  |  |  |  |
| TCGA.AA.A02F | Stage IV | female | 0 | 68 | 1216 |  |  |  |  |  |  |  |  |
| TCGA.AA.A02H | Stage IV | female | 1 | 74 | 61 |  |  |  |  |  |  |  |  |
| TCGA.AA.A02J | Stage IV | female | 1 | 70 | 153 |  |  |  |  |  |  |  |  |
| TCGA.AA.A02K | Stage IV | male | 1 | 50 | 426 |  |  |  |  |  |  |  |  |
| TCGA.AA.A02O | Stage II | male | 0 | 82 | 28 |  |  |  |  |  |  |  |  |
| TCGA.AA.A02R | Stage IIA | female | 1 | 84 | 670 |  |  |  |  |  |  |  |  |
| TCGA.AA.A02W | Stage I | female | 0 | 73 | 1247 |  |  |  |  |  |  |  |  |
| TCGA.AA.A02Y | Stage I | male | 0 | 73 | 1216 |  |  |  |  |  |  |  |  |
| TCGA.AA.A03J | Stage I | female | 0 | 65 | 1246 |  |  |  |  |  |  |  |  |
| TCGA.AD.5900 | Stage I | male | 0 | 67 | 370 |  |  |  |  |  |  |  |  |
| TCGA.AD.6548 | Stage I | female | 0 | 81 | 650 |  |  |  |  |  |  |  |  |
| TCGA.AD.6888 | Stage IIIB | male | 1 | 73 | 472 |  |  |  |  |  |  |  |  |
| TCGA.AD.6889 | Stage IIA | male | 1 | 76 | 2532 |  |  |  |  |  |  |  |  |
| TCGA.AD.6895 | Stage IIIB | male | 0 | 84 | 763 |  |  |  |  |  |  |  |  |
| TCGA.AD.6899 | Stage IIIC | male | 1 | 84 | 176 |  |  |  |  |  |  |  |  |
| TCGA.AD.6965 | Stage IIIC | male | 0 | 62 | 805 |  |  |  |  |  |  |  |  |
| TCGA.AD.A5EK | Stage I | male | 0 | 51 | 500 |  |  |  |  |  |  |  |  |
| TCGA.AF.2687 | Stage IIIC | male | 0 | 57 | 1427 |  |  |  |  |  |  |  |  |
| TCGA.AF.2690 | Stage IIIC | female | 1 | 76 | 524 |  |  |  |  |  |  |  |  |
| TCGA.AF.2691 | Stage I | female | 0 | 48 | 1309 |  |  |  |  |  |  |  |  |
| TCGA.AF.2692 | Stage IIA | female | 0 | 54 | 412 |  |  |  |  |  |  |  |  |
| TCGA.AF.2693 | Stage I | male | 0 | 75 | 1155 |  |  |  |  |  |  |  |  |
| TCGA.AF.3400 | Stage IIA | male | 0 | 54 | 1049 |  |  |  |  |  |  |  |  |
| TCGA.AF.3911 | Stage IIIC | male | 0 | 48 | 1148 |  |  |  |  |  |  |  |  |
| TCGA.AF.3913 | Stage IV | male | 1 | 60 | 316 |  |  |  |  |  |  |  |  |
| TCGA.AF.4110 | Stage IVA | male | 0 | 77 | 912 |  |  |  |  |  |  |  |  |
| TCGA.AF.5654 | Stage I | female | 1 | 73 | 512 |  |  |  |  |  |  |  |  |
| TCGA.AF.6136 | Stage IIIB | female | 0 | 72 | 741 |  |  |  |  |  |  |  |  |
| TCGA.AF.6655 | Stage IIIA | male | 0 | 66 | 609 |  |  |  |  |  |  |  |  |
| TCGA.AF.6672 | Stage IV | male | 0 | 43 | 748 |  |  |  |  |  |  |  |  |
| TCGA.AF.A56K | Stage IIA | male | 0 | 56 | 2635 |  |  |  |  |  |  |  |  |
| TCGA.AF.A56L | Stage IIIC | female | 0 | 48 | 2007 |  |  |  |  |  |  |  |  |
| TCGA.AF.A56N | Stage IIA | female | 0 | 47 | 360 |  |  |  |  |  |  |  |  |
| TCGA.AG.3574 | Stage II | female | 1 | 89 | 91 |  |  |  |  |  |  |  |  |
| TCGA.AG.3575 | Stage II | male | 0 | 51 | 365 |  |  |  |  |  |  |  |  |
| TCGA.AG.3578 | Stage IIA | female | 0 | 76 | 974 |  |  |  |  |  |  |  |  |
| TCGA.AG.3580 | Stage I | male | 0 | 67 | 244 |  |  |  |  |  |  |  |  |
| TCGA.AG.3581 | Stage I | male | 0 | 63 | 215 |  |  |  |  |  |  |  |  |
| TCGA.AG.3582 | Stage IV | male | 1 | 75 | 1096 |  |  |  |  |  |  |  |  |
| TCGA.AG.3583 | Stage IV | male | 1 | 66 | 610 |  |  |  |  |  |  |  |  |
| TCGA.AG.3584 | Stage IV | male | 1 | 60 | 730 |  |  |  |  |  |  |  |  |
| TCGA.AG.3586 | Stage III | female | 0 | 72 | 31 |  |  |  |  |  |  |  |  |
| TCGA.AG.3587 | Stage I | male | 0 | 65 | 1400 |  |  |  |  |  |  |  |  |
| TCGA.AG.3591 | Stage IIA | female | 0 | 66 | 1035 |  |  |  |  |  |  |  |  |
| TCGA.AG.3592 | Stage IIA | male | 0 | 68 | 1035 |  |  |  |  |  |  |  |  |
| TCGA.AG.3593 | Stage IIA | female | 0 | 72 | 1035 |  |  |  |  |  |  |  |  |
| TCGA.AG.3594 | Stage IIA | male | 1 | 77 | 61 |  |  |  |  |  |  |  |  |
| TCGA.AG.3598 | Stage IIA | male | 0 | 69 | 1522 |  |  |  |  |  |  |  |  |
| TCGA.AG.3599 | Stage I | male | 0 | 70 | 366 |  |  |  |  |  |  |  |  |
| TCGA.AG.3600 | Stage IIIC | male | 0 | 62 | 184 |  |  |  |  |  |  |  |  |
| TCGA.AG.3605 | Stage IV | female | 0 | 85 | 30 |  |  |  |  |  |  |  |  |
| TCGA.AG.3608 | Stage IIA | female | 0 | 79 | 485 |  |  |  |  |  |  |  |  |
| TCGA.AG.3609 | Stage IIIC | female | 0 | 65 | 608 |  |  |  |  |  |  |  |  |
| TCGA.AG.3611 | Stage IIA | male | 0 | 72 | 424 |  |  |  |  |  |  |  |  |
| TCGA.AG.3612 | Stage IIIB | female | 0 | 55 | 608 |  |  |  |  |  |  |  |  |
| TCGA.AG.3726 | Stage I | female | 0 | 63 | 243 |  |  |  |  |  |  |  |  |
| TCGA.AG.3727 | Stage III | female | 0 | 78 | 30 |  |  |  |  |  |  |  |  |
| TCGA.AG.3728 | Stage IIIB | male | 0 | 73 | 912 |  |  |  |  |  |  |  |  |
| TCGA.AG.3731 | Stage IV | male | 0 | 65 | 1126 |  |  |  |  |  |  |  |  |
| TCGA.AG.3732 | Stage I | female | 0 | 78 | 1003 |  |  |  |  |  |  |  |  |
| TCGA.AG.3742 | Stage I | female | 0 | 85 | 30 |  |  |  |  |  |  |  |  |
| TCGA.AG.3878 | Stage I | male | 0 | 64 | 30 |  |  |  |  |  |  |  |  |
| TCGA.AG.3881 | Stage IIA | female | 0 | 83 | 579 |  |  |  |  |  |  |  |  |
| TCGA.AG.3882 | Stage I | female | 0 | 66 | 608 |  |  |  |  |  |  |  |  |
| TCGA.AG.3883 | Stage I | male | 0 | 69 | 31 |  |  |  |  |  |  |  |  |
| TCGA.AG.3885 | Stage IIIB | female | 0 | 71 | 546 |  |  |  |  |  |  |  |  |
| TCGA.AG.3887 | Stage IIA | male | 0 | 68 | 1124 |  |  |  |  |  |  |  |  |
| TCGA.AG.3890 | Stage I | male | 0 | 62 | 518 |  |  |  |  |  |  |  |  |
| TCGA.AG.3892 | Stage I | female | 0 | 57 | 396 |  |  |  |  |  |  |  |  |
| TCGA.AG.3893 | Stage IIIB | male | 0 | 74 | 1065 |  |  |  |  |  |  |  |  |
| TCGA.AG.3894 | Stage IIA | male | 0 | 65 | 426 |  |  |  |  |  |  |  |  |
| TCGA.AG.3896 | Stage I | female | 0 | 85 | 31 |  |  |  |  |  |  |  |  |
| TCGA.AG.3898 | Stage IIA | male | 0 | 61 | 1461 |  |  |  |  |  |  |  |  |
| TCGA.AG.3901 | Stage IIIB | female | 0 | 67 | 761 |  |  |  |  |  |  |  |  |
| TCGA.AG.3902 | Stage IIA | male | 0 | 61 | 974 |  |  |  |  |  |  |  |  |
| TCGA.AG.3909 | Stage IIIB | female | 0 | 69 | 608 |  |  |  |  |  |  |  |  |
| TCGA.AG.3999 | Stage IIIC | female | 0 | 61 | 853 |  |  |  |  |  |  |  |  |
| TCGA.AG.4001 | Stage IIA | female | 0 | 74 | 1096 |  |  |  |  |  |  |  |  |
| TCGA.AG.4005 | Stage IV | male | 0 | 64 | 427 |  |  |  |  |  |  |  |  |
| TCGA.AG.4007 | Stage IV | male | 0 | 87 | 31 |  |  |  |  |  |  |  |  |
| TCGA.AG.4008 | Stage IIA | male | 0 | 63 | 518 |  |  |  |  |  |  |  |  |
| TCGA.AG.4021 | Stage IV | female | 1 | 84 | 121 |  |  |  |  |  |  |  |  |
| TCGA.AG.4022 | Stage II | female | 0 | 59 | 1400 |  |  |  |  |  |  |  |  |
| TCGA.AG.A002 | Stage I | male | 0 | 35 | 638 |  |  |  |  |  |  |  |  |
| TCGA.AG.A008 | Stage I | female | 0 | 50 | 424 |  |  |  |  |  |  |  |  |
| TCGA.AG.A00C | Stage IIIB | female | 0 | 49 | 183 |  |  |  |  |  |  |  |  |
| TCGA.AG.A00H | Stage IIA | male | 0 | 75 | 790 |  |  |  |  |  |  |  |  |
| TCGA.AG.A00Y | Stage IIA | male | 0 | 68 | 700 |  |  |  |  |  |  |  |  |
| TCGA.AG.A011 | Stage IIA | male | 0 | 80 | 1126 |  |  |  |  |  |  |  |  |
| TCGA.AG.A014 | Stage I | male | 0 | 86 | 485 |  |  |  |  |  |  |  |  |
| TCGA.AG.A015 | Stage I | female | 0 | 64 | 1096 |  |  |  |  |  |  |  |  |
| TCGA.AG.A016 | Stage IV | male | 0 | 55 | 276 |  |  |  |  |  |  |  |  |
| TCGA.AG.A01J | Stage IIA | female | 0 | 59 | 31 |  |  |  |  |  |  |  |  |
| TCGA.AG.A01N | Stage IV | female | 0 | 68 | 943 |  |  |  |  |  |  |  |  |
| TCGA.AG.A020 | Stage III | female | 0 | 57 | 31 |  |  |  |  |  |  |  |  |
| TCGA.AG.A023 | Stage IV | female | 1 | 62 | 1581 |  |  |  |  |  |  |  |  |
| TCGA.AG.A025 | Stage I | female | 0 | 62 | 1520 |  |  |  |  |  |  |  |  |
| TCGA.AG.A026 | Stage II | male | 1 | 66 | 59 |  |  |  |  |  |  |  |  |
| TCGA.AG.A02G | Stage IV | male | 1 | 66 | 1185 |  |  |  |  |  |  |  |  |
| TCGA.AG.A02N | Stage II | male | 0 | 67 | 1885 |  |  |  |  |  |  |  |  |
| TCGA.AG.A02X | Stage I | male | 0 | 77 | 1247 |  |  |  |  |  |  |  |  |
| TCGA.AG.A032 | Stage IIIB | male | 0 | 68 | 1157 |  |  |  |  |  |  |  |  |
| TCGA.AG.A036 | Stage III | male | 0 | 71 | 3562 |  |  |  |  |  |  |  |  |
| TCGA.AH.6643 | Stage IIIC | male | 1 | 50 | 1314 |  |  |  |  |  |  |  |  |
| TCGA.AH.6897 | Stage I | male | 0 | 48 | 804 |  |  |  |  |  |  |  |  |
| TCGA.AH.6903 | Stage IIIB | male | 0 | 46 | 592 |  |  |  |  |  |  |  |  |
| TCGA.AM.5820 | Stage IVA | female | 0 | 59 | 14 |  |  |  |  |  |  |  |  |
| TCGA.AM.5821 | Stage IIA | female | 0 | 68 | 28 |  |  |  |  |  |  |  |  |
| TCGA.AU.3779 | Stage IIA | female | 0 | 80 | 441 |  |  |  |  |  |  |  |  |
| TCGA.AU.6004 | Stage I | female | 0 | 69 | 824 |  |  |  |  |  |  |  |  |
| TCGA.AY.4070 | Stage IIIC | female | 1 | 50 | 496 |  |  |  |  |  |  |  |  |
| TCGA.AY.4071 | Stage I | female | 1 | 63 | 29 |  |  |  |  |  |  |  |  |
| TCGA.AY.5543 | Stage IVA | female | 0 | 65 | 1004 |  |  |  |  |  |  |  |  |
| TCGA.AY.6196 | Stage IIIC | male | 0 | 47 | 6 |  |  |  |  |  |  |  |  |
| TCGA.AY.6197 | Stage IIA | male | 0 | 60 | 652 |  |  |  |  |  |  |  |  |
| TCGA.AY.6386 | Stage IIIB | female | 0 | 66 | 542 |  |  |  |  |  |  |  |  |
| TCGA.AY.A54L | Stage I | female | 0 | 74 | 525 |  |  |  |  |  |  |  |  |
| TCGA.AY.A69D | Stage IIA | female | 0 | 55 | 543 |  |  |  |  |  |  |  |  |
| TCGA.AY.A71X | Stage I | female | 0 | 54 | 588 |  |  |  |  |  |  |  |  |
| TCGA.AY.A8YK | Stage IVA | male | 0 | 44 | 573 |  |  |  |  |  |  |  |  |
| TCGA.AZ.4308 | Stage IIIB | female | 0 | 47 | 3324 |  |  |  |  |  |  |  |  |
| TCGA.AZ.4313 | Stage I | female | 0 | 51 | 2310 |  |  |  |  |  |  |  |  |
| TCGA.AZ.4315 | Stage IIA | male | 0 | 61 | 1776 |  |  |  |  |  |  |  |  |
| TCGA.AZ.4323 | Stage IV | male | 1 | 37 | 43 |  |  |  |  |  |  |  |  |
| TCGA.AZ.4614 | Stage IVA | female | 1 | 71 | 172 |  |  |  |  |  |  |  |  |
| TCGA.AZ.4615 | Stage IIIB | male | 0 | 84 | 1002 |  |  |  |  |  |  |  |  |
| TCGA.AZ.4616 | Stage IV | female | 1 | 82 | 156 |  |  |  |  |  |  |  |  |
| TCGA.AZ.4681 | Stage IIA | female | 0 | 79 | 3247 |  |  |  |  |  |  |  |  |
| TCGA.AZ.4684 | Stage IVA | male | 0 | 49 | 1977 |  |  |  |  |  |  |  |  |
| TCGA.AZ.5403 | Stage II | male | 1 | 43 | 1910 |  |  |  |  |  |  |  |  |
| TCGA.AZ.5407 | Stage I | female | 0 | 51 | 2683 |  |  |  |  |  |  |  |  |
| TCGA.AZ.6598 | Stage II | female | 1 | 77 | 1503 |  |  |  |  |  |  |  |  |
| TCGA.AZ.6599 | Stage I | male | 1 | 72 | 206 |  |  |  |  |  |  |  |  |
| TCGA.AZ.6600 | Stage IV | male | 1 | 64 | 368 |  |  |  |  |  |  |  |  |
| TCGA.AZ.6601 | Stage II | male | 1 | 68 | 3042 |  |  |  |  |  |  |  |  |
| TCGA.AZ.6605 | Stage IIIB | male | 1 | 77 | 159 |  |  |  |  |  |  |  |  |
| TCGA.AZ.6606 | Stage IV | male | 1 | 81 | 357 |  |  |  |  |  |  |  |  |
| TCGA.AZ.6607 | Stage IV | male | 1 | 69 | 97 |  |  |  |  |  |  |  |  |
| TCGA.AZ.6608 | Stage IIIA | female | 1 | 55 | 59 |  |  |  |  |  |  |  |  |
| TCGA.BM.6198 | Stage IIIB | male | 0 | 73 | 646 |  |  |  |  |  |  |  |  |
| TCGA.CA.5254 | Stage IIA | female | 0 | 42 | 386 |  |  |  |  |  |  |  |  |
| TCGA.CA.5255 | Stage IIA | male | 0 | 45 | 376 |  |  |  |  |  |  |  |  |
| TCGA.CA.5256 | Stage IIA | female | 0 | 54 | 379 |  |  |  |  |  |  |  |  |
| TCGA.CA.5796 | Stage IIA | female | 0 | 52 | 377 |  |  |  |  |  |  |  |  |
| TCGA.CA.5797 | Stage IIA | male | 0 | 56 | 383 |  |  |  |  |  |  |  |  |
| TCGA.CA.6715 | Stage IIIB | male | 0 | 63 | 383 |  |  |  |  |  |  |  |  |
| TCGA.CA.6716 | Stage IIA | male | 0 | 65 | 371 |  |  |  |  |  |  |  |  |
| TCGA.CA.6717 | Stage IIA | male | 0 | 57 | 388 |  |  |  |  |  |  |  |  |
| TCGA.CA.6718 | Stage IIA | male | 1 | 46 | 306 |  |  |  |  |  |  |  |  |
| TCGA.CA.6719 | Stage IIA | male | 0 | 77 | 435 |  |  |  |  |  |  |  |  |
| TCGA.CI.6620 | Stage IVA | female | 0 | 41 | 1009 |  |  |  |  |  |  |  |  |
| TCGA.CI.6621 | Stage IIIB | male | 0 | 63 | 419 |  |  |  |  |  |  |  |  |
| TCGA.CI.6622 | Stage IIB | male | 0 | 74 | 1362 |  |  |  |  |  |  |  |  |
| TCGA.CK.4950 | Stage IIIB | female | 0 | 68 | 2599 |  |  |  |  |  |  |  |  |
| TCGA.CK.4951 | Stage IIA | female | 1 | 79 | 2134 |  |  |  |  |  |  |  |  |
| TCGA.CK.4952 | Stage IIIC | female | 0 | 48 | 475 |  |  |  |  |  |  |  |  |
| TCGA.CK.5912 | Stage I | male | 1 | 81 | 1493 |  |  |  |  |  |  |  |  |
| TCGA.CK.5913 | Stage IIA | female | 0 | 58 | 1561 |  |  |  |  |  |  |  |  |
| TCGA.CK.5914 | Stage IIIB | male | 0 | 81 | 669 |  |  |  |  |  |  |  |  |
| TCGA.CK.5916 | Stage I | female | 1 | 71 | 643 |  |  |  |  |  |  |  |  |
| TCGA.CK.6747 | Stage IIA | female | 0 | 87 | 820 |  |  |  |  |  |  |  |  |
| TCGA.CK.6748 | Stage IV | female | 0 | 45 | 61 |  |  |  |  |  |  |  |  |
| TCGA.CK.6751 | Stage I | female | 0 | 88 | 518 |  |  |  |  |  |  |  |  |
| TCGA.CL.5917 | Stage IIIC | female | 0 | 71 | 2376 |  |  |  |  |  |  |  |  |
| TCGA.CM.4743 | Stage IIA | male | 0 | 69 | 701 |  |  |  |  |  |  |  |  |
| TCGA.CM.4744 | Stage I | male | 0 | 69 | 609 |  |  |  |  |  |  |  |  |
| TCGA.CM.4746 | Stage I | male | 0 | 61 | 1126 |  |  |  |  |  |  |  |  |
| TCGA.CM.4747 | Stage IVA | male | 0 | 47 | 761 |  |  |  |  |  |  |  |  |
| TCGA.CM.4748 | Stage IIIB | male | 0 | 53 | 792 |  |  |  |  |  |  |  |  |
| TCGA.CM.4750 | Stage IIIA | female | 0 | 34 | 244 |  |  |  |  |  |  |  |  |
| TCGA.CM.4751 | Stage IIIB | male | 0 | 62 | 822 |  |  |  |  |  |  |  |  |
| TCGA.CM.4752 | Stage IIA | male | 0 | 58 | 396 |  |  |  |  |  |  |  |  |
| TCGA.CM.5341 | Stage IIIA | female | 0 | 82 | 884 |  |  |  |  |  |  |  |  |
| TCGA.CM.5344 | Stage IIIB | female | 0 | 39 | 670 |  |  |  |  |  |  |  |  |
| TCGA.CM.5348 | Stage IIIB | male | 0 | 72 | 699 |  |  |  |  |  |  |  |  |
| TCGA.CM.5349 | Stage IIA | female | 0 | 68 | 915 |  |  |  |  |  |  |  |  |
| TCGA.CM.5860 | Stage IIA | male | 0 | 44 | 974 |  |  |  |  |  |  |  |  |
| TCGA.CM.5861 | Stage IIA | female | 0 | 63 | 457 |  |  |  |  |  |  |  |  |
| TCGA.CM.5862 | Stage IVA | male | 1 | 80 | 153 |  |  |  |  |  |  |  |  |
| TCGA.CM.5863 | Stage IIIB | female | 0 | 60 | 457 |  |  |  |  |  |  |  |  |
| TCGA.CM.5864 | Stage I | male | 0 | 60 | 457 |  |  |  |  |  |  |  |  |
| TCGA.CM.5868 | Stage IVA | female | 0 | 59 | 518 |  |  |  |  |  |  |  |  |
| TCGA.CM.6161 | Stage I | female | 0 | 36 | 457 |  |  |  |  |  |  |  |  |
| TCGA.CM.6162 | Stage IIIB | female | 0 | 48 | 365 |  |  |  |  |  |  |  |  |
| TCGA.CM.6163 | Stage I | male | 0 | 74 | 427 |  |  |  |  |  |  |  |  |
| TCGA.CM.6164 | Stage IIA | female | 0 | 46 | 883 |  |  |  |  |  |  |  |  |
| TCGA.CM.6165 | Stage IIA | male | 0 | 74 | 488 |  |  |  |  |  |  |  |  |
| TCGA.CM.6166 | Stage I | female | 0 | 48 | 669 |  |  |  |  |  |  |  |  |
| TCGA.CM.6167 | Stage IIIC | female | 0 | 57 | 456 |  |  |  |  |  |  |  |  |
| TCGA.CM.6168 | Stage IIA | female | 0 | 84 | 395 |  |  |  |  |  |  |  |  |
| TCGA.CM.6169 | Stage IIA | male | 0 | 67 | 396 |  |  |  |  |  |  |  |  |
| TCGA.CM.6170 | Stage I | female | 0 | 73 | 457 |  |  |  |  |  |  |  |  |
| TCGA.CM.6171 | Stage I | female | 0 | 77 | 427 |  |  |  |  |  |  |  |  |
| TCGA.CM.6172 | Stage IIIB | female | 0 | 70 | 335 |  |  |  |  |  |  |  |  |
| TCGA.CM.6674 | Stage IIA | male | 0 | 39 | 394 |  |  |  |  |  |  |  |  |
| TCGA.CM.6675 | Stage IVB | male | 0 | 35 | 397 |  |  |  |  |  |  |  |  |
| TCGA.CM.6676 | Stage I | male | 0 | 82 | 337 |  |  |  |  |  |  |  |  |
| TCGA.CM.6677 | Stage IIA | female | 0 | 75 | 337 |  |  |  |  |  |  |  |  |
| TCGA.CM.6678 | Stage IVA | female | 0 | 63 | 335 |  |  |  |  |  |  |  |  |
| TCGA.CM.6679 | Stage IIA | male | 0 | 58 | 306 |  |  |  |  |  |  |  |  |
| TCGA.CM.6680 | Stage IIIB | female | 0 | 78 | 366 |  |  |  |  |  |  |  |  |
| TCGA.D5.5538 | Stage IIIB | female | 1 | 60 | 1661 |  |  |  |  |  |  |  |  |
| TCGA.D5.5539 | Stage IIIA | male | 0 | 60 | 596 |  |  |  |  |  |  |  |  |
| TCGA.D5.5540 | Stage IIA | male | 0 | 73 | 1706 |  |  |  |  |  |  |  |  |
| TCGA.D5.5541 | Stage IIIB | male | 0 | 63 | 1701 |  |  |  |  |  |  |  |  |
| TCGA.D5.6529 | Stage IIA | male | 0 | 69 | 614 |  |  |  |  |  |  |  |  |
| TCGA.D5.6530 | Stage I | male | 0 | 53 | 621 |  |  |  |  |  |  |  |  |
| TCGA.D5.6531 | Stage IIA | male | 0 | 75 | 540 |  |  |  |  |  |  |  |  |
| TCGA.D5.6532 | Stage IIA | male | 0 | 61 | 555 |  |  |  |  |  |  |  |  |
| TCGA.D5.6534 | Stage IIA | female | 0 | 62 | 1316 |  |  |  |  |  |  |  |  |
| TCGA.D5.6535 | Stage IIIB | female | 0 | 80 | 460 |  |  |  |  |  |  |  |  |
| TCGA.D5.6536 | Stage IIA | male | 0 | 73 | 543 |  |  |  |  |  |  |  |  |
| TCGA.D5.6537 | Stage IIIB | male | 1 | 64 | 146 |  |  |  |  |  |  |  |  |
| TCGA.D5.6538 | Stage IIIB | female | 0 | 79 | 521 |  |  |  |  |  |  |  |  |
| TCGA.D5.6540 | Stage I | male | 0 | 66 | 491 |  |  |  |  |  |  |  |  |
| TCGA.D5.6541 | Stage IIA | male | 0 | 49 | 474 |  |  |  |  |  |  |  |  |
| TCGA.D5.6898 | Stage I | female | 0 | 51 | 229 |  |  |  |  |  |  |  |  |
| TCGA.D5.6920 | Stage IIA | female | 0 | 77 | 377 |  |  |  |  |  |  |  |  |
| TCGA.D5.6922 | Stage IIIA | male | 0 | 76 | 308 |  |  |  |  |  |  |  |  |
| TCGA.D5.6923 | Stage I | male | 0 | 57 | 378 |  |  |  |  |  |  |  |  |
| TCGA.D5.6924 | Stage IIA | male | 0 | 68 | 435 |  |  |  |  |  |  |  |  |
| TCGA.D5.6926 | Stage IIIB | male | 0 | 65 | 275 |  |  |  |  |  |  |  |  |
| TCGA.D5.6927 | Stage IIA | male | 0 | 34 | 287 |  |  |  |  |  |  |  |  |
| TCGA.D5.6928 | Stage IIA | male | 0 | 80 | 354 |  |  |  |  |  |  |  |  |
| TCGA.D5.6929 | Stage IV | female | 0 | 49 | 408 |  |  |  |  |  |  |  |  |
| TCGA.D5.6930 | Stage IIA | male | 0 | 67 | 406 |  |  |  |  |  |  |  |  |
| TCGA.D5.6931 | Stage IIIC | male | 0 | 77 | 365 |  |  |  |  |  |  |  |  |
| TCGA.D5.6932 | Stage IIA | male | 0 | 69 | 346 |  |  |  |  |  |  |  |  |
| TCGA.D5.7000 | Stage I | female | 0 | 79 | 312 |  |  |  |  |  |  |  |  |
| TCGA.DC.4745 | Stage IIIB | female | 0 | 49 | 639 |  |  |  |  |  |  |  |  |
| TCGA.DC.4749 | Stage I | male | 0 | 57 | 762 |  |  |  |  |  |  |  |  |
| TCGA.DC.5337 | Stage I | male | 0 | 69 | 792 |  |  |  |  |  |  |  |  |
| TCGA.DC.5869 | Stage IIIB | female | 0 | 62 | 943 |  |  |  |  |  |  |  |  |
| TCGA.DC.6154 | Stage IVA | female | 0 | 57 | 365 |  |  |  |  |  |  |  |  |
| TCGA.DC.6155 | Stage IIIA | female | 0 | 31 | 425 |  |  |  |  |  |  |  |  |
| TCGA.DC.6156 | Stage IVA | male | 0 | 62 | 943 |  |  |  |  |  |  |  |  |
| TCGA.DC.6157 | Stage I | male | 0 | 48 | 1581 |  |  |  |  |  |  |  |  |
| TCGA.DC.6158 | Stage I | male | 1 | 70 | 334 |  |  |  |  |  |  |  |  |
| TCGA.DC.6160 | Stage I | male | 0 | 68 | 1339 |  |  |  |  |  |  |  |  |
| TCGA.DC.6681 | Stage IVA | female | 0 | 70 | 790 |  |  |  |  |  |  |  |  |
| TCGA.DC.6682 | Stage IIA | male | 0 | 57 | 762 |  |  |  |  |  |  |  |  |
| TCGA.DC.6683 | Stage IIIB | male | 0 | 43 | 762 |  |  |  |  |  |  |  |  |
| TCGA.DM.A0X9 | Stage IIA | female | 0 | 71 | 3641 |  |  |  |  |  |  |  |  |
| TCGA.DM.A0XD | Stage IIA | male | 1 | 65 | 743 |  |  |  |  |  |  |  |  |
| TCGA.DM.A0XF | Stage IIIC | female | 1 | 68 | 1162 |  |  |  |  |  |  |  |  |
| TCGA.DM.A1D0 | Stage IIA | female | 0 | 79 | 3974 |  |  |  |  |  |  |  |  |
| TCGA.DM.A1D4 | Stage IIA | male | 1 | 80 | 2821 |  |  |  |  |  |  |  |  |
| TCGA.DM.A1D6 | Stage IIA | male | 1 | 88 | 570 |  |  |  |  |  |  |  |  |
| TCGA.DM.A1D7 | Stage IIA | male | 1 | 82 | 405 |  |  |  |  |  |  |  |  |
| TCGA.DM.A1D9 | Stage IIA | female | 0 | 67 | 4270 |  |  |  |  |  |  |  |  |
| TCGA.DM.A1DA | Stage IIIC | female | 1 | 71 | 228 |  |  |  |  |  |  |  |  |
| TCGA.DM.A1DB | Stage IIA | male | 1 | 68 | 1348 |  |  |  |  |  |  |  |  |
| TCGA.DM.A1HA | Stage IIIC | male | 0 | 82 | 2600 |  |  |  |  |  |  |  |  |
| TCGA.DM.A1HB | Stage IIIB | male | 0 | 75 | 4126 |  |  |  |  |  |  |  |  |
| TCGA.DM.A280 | Stage IIA | female | 1 | 70 | 236 |  |  |  |  |  |  |  |  |
| TCGA.DM.A282 | Stage IIA | female | 0 | 60 | 4233 |  |  |  |  |  |  |  |  |
| TCGA.DM.A285 | Stage IV | female | 1 | 71 | 179 |  |  |  |  |  |  |  |  |
| TCGA.DM.A288 | Stage IIIC | male | 1 | 68 | 427 |  |  |  |  |  |  |  |  |
| TCGA.DM.A28A | Stage IIIC | male | 1 | 78 | 805 |  |  |  |  |  |  |  |  |
| TCGA.DM.A28C | Stage IIA | male | 1 | 74 | 2475 |  |  |  |  |  |  |  |  |
| TCGA.DM.A28E | Stage IIA | female | 0 | 72 | 3648 |  |  |  |  |  |  |  |  |
| TCGA.DM.A28F | Stage IIIB | male | 1 | 73 | 1094 |  |  |  |  |  |  |  |  |
| TCGA.DM.A28G | Stage IIA | male | 1 | 75 | 1849 |  |  |  |  |  |  |  |  |
| TCGA.DM.A28H | Stage IIIC | male | 0 | 50 | 3561 |  |  |  |  |  |  |  |  |
| TCGA.DM.A28K | Stage IIA | male | 0 | 75 | 2988 |  |  |  |  |  |  |  |  |
| TCGA.DM.A28M | Stage IIA | male | 0 | 63 | 2895 |  |  |  |  |  |  |  |  |
| TCGA.DT.5265 | Stage II | male | 0 | 51 | 384 |  |  |  |  |  |  |  |  |
| TCGA.DY.A0XA | Stage IIA | female | 0 | 57 | 3846 |  |  |  |  |  |  |  |  |
| TCGA.DY.A1DC | Stage IIA | female | 1 | 72 | 1258 |  |  |  |  |  |  |  |  |
| TCGA.DY.A1DD | Stage IIIB | female | 1 | 77 | 1741 |  |  |  |  |  |  |  |  |
| TCGA.DY.A1DE | Stage IIA | female | 0 | 56 | 3932 |  |  |  |  |  |  |  |  |
| TCGA.DY.A1DF | Stage IIIC | female | 1 | 73 | 734 |  |  |  |  |  |  |  |  |
| TCGA.DY.A1DG | Stage IVA | male | 1 | 75 | 1566 |  |  |  |  |  |  |  |  |
| TCGA.DY.A1H8 | Stage IIIA | female | 1 | 77 | 992 |  |  |  |  |  |  |  |  |
| TCGA.EF.5830 | Stage IIB | male | 0 | 54 | 106 |  |  |  |  |  |  |  |  |
| TCGA.EF.5831 | Stage IIA | male | 0 | 72 | 127 |  |  |  |  |  |  |  |  |
| TCGA.EI.6506 | Stage IIA | female | 0 | 78 | 625 |  |  |  |  |  |  |  |  |
| TCGA.EI.6507 | Stage IIA | male | 0 | 60 | 607 |  |  |  |  |  |  |  |  |
| TCGA.EI.6508 | Stage IIIB | female | 0 | 48 | 636 |  |  |  |  |  |  |  |  |
| TCGA.EI.6509 | Stage IIIC | male | 0 | 53 | 517 |  |  |  |  |  |  |  |  |
| TCGA.EI.6511 | Stage IIIB | male | 0 | 52 | 482 |  |  |  |  |  |  |  |  |
| TCGA.EI.6512 | Stage IIIB | female | 0 | 64 | 538 |  |  |  |  |  |  |  |  |
| TCGA.EI.6513 | Stage IIIB | male | 0 | 59 | 497 |  |  |  |  |  |  |  |  |
| TCGA.EI.6514 | Stage IIA | female | 0 | 59 | 496 |  |  |  |  |  |  |  |  |
| TCGA.EI.6881 | Stage IIIA | male | 0 | 60 | 499 |  |  |  |  |  |  |  |  |
| TCGA.EI.6882 | Stage IIA | male | 0 | 59 | 262 |  |  |  |  |  |  |  |  |
| TCGA.EI.6883 | Stage IIC | male | 0 | 63 | 350 |  |  |  |  |  |  |  |  |
| TCGA.EI.6884 | Stage IIIA | male | 0 | 71 | 328 |  |  |  |  |  |  |  |  |
| TCGA.EI.6885 | Stage IV | female | 0 | 57 | 415 |  |  |  |  |  |  |  |  |
| TCGA.EI.6917 | Stage IIIA | male | 0 | 33 | 531 |  |  |  |  |  |  |  |  |
| TCGA.EI.7002 | Stage IV | male | 0 | 58 | 364 |  |  |  |  |  |  |  |  |
| TCGA.F4.6459 | Stage IIIB | female | 1 | 61 | 262 |  |  |  |  |  |  |  |  |
| TCGA.F4.6460 | Stage IIIB | female | 1 | 51 | 972 |  |  |  |  |  |  |  |  |
| TCGA.F4.6461 | Stage IIIC | female | 1 | 41 | 338 |  |  |  |  |  |  |  |  |
| TCGA.F4.6463 | Stage IIA | male | 0 | 51 | 1087 |  |  |  |  |  |  |  |  |
| TCGA.F4.6569 | Stage I | male | 0 | 60 | 1087 |  |  |  |  |  |  |  |  |
| TCGA.F4.6570 | Stage IIA | female | 1 | 78 | 188 |  |  |  |  |  |  |  |  |
| TCGA.F4.6703 | Stage IIA | male | 0 | 64 | 1456 |  |  |  |  |  |  |  |  |
| TCGA.F4.6704 | Stage IIIC | male | 0 | 60 | 47 |  |  |  |  |  |  |  |  |
| TCGA.F4.6805 | Stage IIA | female | 0 | 58 | 1047 |  |  |  |  |  |  |  |  |
| TCGA.F4.6806 | Stage I | female | 0 | 59 | 1260 |  |  |  |  |  |  |  |  |
| TCGA.F4.6807 | Stage IIIC | female | 0 | 51 | 1309 |  |  |  |  |  |  |  |  |
| TCGA.F4.6808 | Stage I | female | 0 | 54 | 1024 |  |  |  |  |  |  |  |  |
| TCGA.F4.6809 | Stage IVA | female | 1 | 52 | 403 |  |  |  |  |  |  |  |  |
| TCGA.F4.6854 | Stage IIA | female | 0 | 77 | 16 |  |  |  |  |  |  |  |  |
| TCGA.F4.6855 | Stage IIA | female | 0 | 70 | 1442 |  |  |  |  |  |  |  |  |
| TCGA.F4.6856 | Stage I | male | 0 | 45 | 1074 |  |  |  |  |  |  |  |  |
| TCGA.F5.6464 | Stage IIIC | female | 1 | 77 | 303 |  |  |  |  |  |  |  |  |
| TCGA.F5.6465 | Stage IIA | female | 0 | 64 | 1506 |  |  |  |  |  |  |  |  |
| TCGA.F5.6571 | Stage IIA | female | 0 | 62 | 1288 |  |  |  |  |  |  |  |  |
| TCGA.F5.6702 | Stage IVA | male | 1 | 71 | 869 |  |  |  |  |  |  |  |  |
| TCGA.F5.6811 | Stage IIA | female | 0 | 72 | 979 |  |  |  |  |  |  |  |  |
| TCGA.F5.6812 | Stage IIA | male | 0 | 67 | 1110 |  |  |  |  |  |  |  |  |
| TCGA.F5.6813 | Stage IIIC | male | 1 | 70 | 598 |  |  |  |  |  |  |  |  |
| TCGA.F5.6814 | Stage IIA | male | 0 | 57 | 1131 |  |  |  |  |  |  |  |  |
| TCGA.F5.6861 | Stage IIA | female | 0 | 60 | 1160 |  |  |  |  |  |  |  |  |
| TCGA.F5.6863 | Stage IIIB | female | 1 | 71 | 361 |  |  |  |  |  |  |  |  |
| TCGA.F5.6864 | Stage IIIB | female | 0 | 74 | 379 |  |  |  |  |  |  |  |  |
| TCGA.G4.6293 | Stage III | female | 0 | 49 | 4051 |  |  |  |  |  |  |  |  |
| TCGA.G4.6294 | Stage IV | male | 1 | 75 | 858 |  |  |  |  |  |  |  |  |
| TCGA.G4.6295 | Stage II | female | 0 | 70 | 254 |  |  |  |  |  |  |  |  |
| TCGA.G4.6297 | Stage IV | female | 0 | 55 | 2506 |  |  |  |  |  |  |  |  |
| TCGA.G4.6299 | Stage IIIC | male | 0 | 69 | 2268 |  |  |  |  |  |  |  |  |
| TCGA.G4.6303 | Stage IV | female | 1 | 54 | 2003 |  |  |  |  |  |  |  |  |
| TCGA.G4.6304 | Stage IIB | female | 0 | 66 | 1631 |  |  |  |  |  |  |  |  |
| TCGA.G4.6307 | Stage IIIB | female | 0 | 37 | 1674 |  |  |  |  |  |  |  |  |
| TCGA.G4.6309 | Stage IIIB | female | 0 | 40 | 2600 |  |  |  |  |  |  |  |  |
| TCGA.G4.6310 | Stage IIIB | male | 0 | 69 | 1935 |  |  |  |  |  |  |  |  |
| TCGA.G4.6311 | Stage III | male | 0 | 80 | 1199 |  |  |  |  |  |  |  |  |
| TCGA.G4.6314 | Stage IV | female | 0 | 76 | 1093 |  |  |  |  |  |  |  |  |
| TCGA.G4.6315 | Stage IV | male | 0 | 66 | 1883 |  |  |  |  |  |  |  |  |
| TCGA.G4.6317 | Stage IIIC | female | 0 | 51 | 1095 |  |  |  |  |  |  |  |  |
| TCGA.G4.6320 | Stage III | male | 0 | 73 | 804 |  |  |  |  |  |  |  |  |
| TCGA.G4.6321 | Stage III | female | 0 | 60 | 672 |  |  |  |  |  |  |  |  |
| TCGA.G4.6322 | Stage IIIB | male | 0 | 65 | 792 |  |  |  |  |  |  |  |  |
| TCGA.G4.6323 | Stage IA | male | 0 | 50 | 419 |  |  |  |  |  |  |  |  |
| TCGA.G4.6586 | Stage IIA | female | 0 | 73 | 1089 |  |  |  |  |  |  |  |  |
| TCGA.G4.6588 | Stage IIA | female | 0 | 58 | 796 |  |  |  |  |  |  |  |  |
| TCGA.G4.6625 | Stage IIA | female | 0 | 77 | 2792 |  |  |  |  |  |  |  |  |
| TCGA.G4.6626 | Stage IIA | male | 1 | 90 | 1 |  |  |  |  |  |  |  |  |
| TCGA.G4.6627 | Stage IIA | male | 0 | 84 | 2175 |  |  |  |  |  |  |  |  |
| TCGA.G4.6628 | Stage I | male | 0 | 78 | 2424 |  |  |  |  |  |  |  |  |
| TCGA.G5.6235 | Stage IIIB | male | 0 | 72 | 1696 |  |  |  |  |  |  |  |  |
| TCGA.G5.6641 | Stage IIIA | male | 0 | 67 | 804 |  |  |  |  |  |  |  |  |
| TCGA.NH.A50T | Stage IIA | female | 0 | 68 | 553 |  |  |  |  |  |  |  |  |
| TCGA.NH.A50U | Stage IVA | male | 1 | 42 | 334 |  |  |  |  |  |  |  |  |
| TCGA.NH.A50V | Stage IIIB | male | 0 | 69 | 588 |  |  |  |  |  |  |  |  |
| TCGA.NH.A6GA | Stage IIIC | male | 1 | 58 | 302 |  |  |  |  |  |  |  |  |
| TCGA.NH.A6GB | Stage IIIC | female | 0 | 71 | 476 |  |  |  |  |  |  |  |  |
| TCGA.NH.A6GC | Stage IVB | female | 0 | 66 | 389 |  |  |  |  |  |  |  |  |
| TCGA.NH.A8F7 | Stage IIA | female | 0 | 53 | 543 |  |  |  |  |  |  |  |  |
| TCGA.NH.A8F8 | Stage IV | male | 1 | 79 | 511 |  |  |  |  |  |  |  |  |
| TCGA.QG.A5YV | Stage IIIC | female | 0 | 64 | 1301 |  |  |  |  |  |  |  |  |
| TCGA.QG.A5YW | Stage IIIC | female | 0 | 55 | 896 |  |  |  |  |  |  |  |  |
| TCGA.QG.A5YX | Stage IIA | female | 0 | 61 | 1003 |  |  |  |  |  |  |  |  |
| TCGA.QG.A5Z1 | Stage IIIB | male | 1 | 71 | 256 |  |  |  |  |  |  |  |  |
| TCGA.QG.A5Z2 | Stage I | male | 0 | 61 | 952 |  |  |  |  |  |  |  |  |
| TCGA.QL.A97D | Stage I | female | 0 | 84 | 666 |  |  |  |  |  |  |  |  |
| TCGA.RU.A8FL | Stage IIIB | male | 0 | 51 | 1177 |  |  |  |  |  |  |  |  |
| TCGA.SS.A7HO | Stage IIB | female | 0 | 44 | 1829 |  |  |  |  |  |  |  |  |
| TCGA.T9.A92H | Stage IIA | male | 0 | 82 | 362 |  |  |  |  |  |  |  |  |
| TCGA.WS.AB45 | Stage IIA | female | 0 | 52 | 2130 |  |  |  |  |  |  |  |  |

**Supplementary Table 1 The clinicopathological information in TCGA and GSE17536.** The table describes the detailed clinicopathological (stage, gender and age) and survival information (event and time) for CRC patients included in the study.

| **Supplementary Table 2.Identification of autophagy- and metastasis- related genes.** | |
| --- | --- |
| **Autophagy-related genes** | **Metastasis- related genes** |
| MTA1 | VMA21 |
| KISS1 | ATG5 |
| MTA2 | BECN1 |
| MTA3 | ULK1 |
| CDH1 | ATG16L1 |
| TP53 | ATG7 |
| EGFR | ATG14 |
| TIAM1 | AMBRA1 |
| MMP9 | ATG12 |
| CTNNB1 | ATG4B |
| ERBB2 | SQSTM1 |
| VEGFA | ATG13 |
| CD82 | ATG3 |
| MMP2 | ATG9A |
| MACC1 | ATG4A |
| NME1 | ATG4D |
| BRAF | ATG4C |
| AKT1 | ATG10 |
| BRMS1 | EPG5 |
| KRAS | ATG9B |
| VEGFC | MAP1LC3B |
| MTSS1 | ATG2B |
| HIF1A | ULK2 |
| PTEN | MAP1LC3A |
| CD44 | DRAM1 |
| CXCR4 | ATG101 |
| STAT3 | MTOR |
| TGFB1 | DRAM2 |
| MET | ATG16L2 |
| SMAD4 | NBR1 |
| S100A4 | ATG2A |
| MYC | LAMP2 |
| CCND1 | RUBCN |
| MMP7 | RUBCNL |
| SRC | BCL2 |
| CDKN2A | RB1CC1 |
| TWIST1 | GABARAPL1 |
| PIK3CA | MAP1LC3C |
| CXCL12 | GABARAP |
| TUG1 | PIK3C3 |
| BRMS1L | DEPP1 |
| MAPK1 | ELAPOR1 |
| PTGS2 | EI24 |
| MMP1 | TFEB |
| MTDH | GABARAPL2 |
| MMP14 | HMGB1 |
| HPSE | OPTN |
| RHOA | FYCO1 |
| RAC1 | UVRAG |
| NOTCH1 | IRGM |
| TIAM2 | TBK1 |
| TERT | PRKAA1 |
| IL6 | TP53 |
| PLAU | VCP |
| PTK2 | C9orf72 |
| ESR1 | WIPI1 |
| SPP1 | PIK3R4 |
| SNAI1 | ELAPOR2 |
| RECK | WIPI2 |
| SNAI2 | HDAC6 |
| VIM | VMP1 |
| PTP4A3 | CALCOCO2 |
| BIRC5 | PRKN |
| CXCL8 | HSPA8 |
| AR | UBQLN2 |
| NFKB1 | PARK7 |
| MLH1 | AKT1 |
| BRCA1 | SNCA |
| RB1 | SIRT1 |
| VEGFD | WDFY3 |
| ZEB1 | PRKAA2 |
| APC | NFE2L2 |
| EZH2 | PINK1 |
| FLT4 | SH3GLB1 |
| CD274 | WDR45 |
| BRCA2 | RPTOR |
| TNF | NOD2 |
| MMP3 | FOXO3 |
| FN1 | BNIP3 |
| BCL2 | LRRK2 |
| MUC1 | UBQLN1 |
| EGF | KEAP1 |
| BSG | MAPT |
| SMAD3 | UBC |
| TGFBR2 | TP53INP2 |
| CCR7 | TARDBP |
| CD9 | DAPK1 |
| MSH2 | STAT3 |
| MDM2 | TAX1BP1 |
| STK11 | RAB7A |
| KISS1R | TP53INP1 |
| NRAS | STX17 |
| FGFR1 | HSP90AA1 |
| YAP1 | WDR41 |
| ITGB1 | NPC1 |
| CREB1 | CISD2 |
| ATM | NRBF2 |
| PLAUR | GSK3B |
| CAV1 | TMEM59 |
| EPCAM | MFN2 |
| MSH6 | TECPR1 |
| HRAS | TRAF6 |
| SMAD2 | LAMP1 |
| TIMP1 | FUS |
| KIT | SOD1 |
| TIMP2 | STING1 |
| PEBP1 | MLST8 |
| IGF1R | MAPK8 |
| MTOR | UBQLN4 |
| MAP2K1 | APP |
| GSK3B | TUFM |
| MTSS2 | TOMM40 |
| HDAC1 | SMCR8 |
| MKI67 | BAG3 |
| CDKN1B | HIF1A |
| SERPINB5 | CHMP2B |
| CEACAM5 | RNF216 |
| MMP11 | TECPR2 |
| HMGB1 | ZKSCAN3 |
| CDKN1A | MAPK14 |
| EZR | BCL2L1 |
| PGR | CASP3 |
| RET | MAPK1 |
| MMP13 | APOE |
| CDK4 | VAMP8 |
| PDPN | ULK3 |
| DPYD | USP10 |
| CTSB | CTSD |
| MAPK3 | MTMR14 |
| HGF | TSC2 |
| GLI1 | NLRP3 |
| CDH2 | TUBA4A |
| KDR | GAA |
| CHEK2 | HDAC10 |
| SP1 | PFN1 |
| FSCN1 | PSEN1 |
| KRT19 | USP13 |
| FGFR2 | TGFB1 |
| LGALS3 | PTEN |
| KRT20 | TBC1D5 |
| WNT5A | NOD1 |
| RHOC | STK11 |
| GNAS | PARP1 |
| CTSD | RAB8A |
| PCNA | RPS6KB1 |
| MCAM | NFKB1 |
| CASP3 | TIA1 |
| BAX | EGFR |
| SERPINE1 | TRIM21 |
| ICAM1 | SPG11 |
| JUN | HNRNPA1 |
| FLT1 | MCL1 |
| HMGA2 | DEPTOR |
| EWSR1 | KRAS |
| TLR4 | MATR3 |
| NFE2L2 | TRIM27 |
| FOXM1 | RAB5A |
| IFNG | VEGFA |
| CDCP1 | HSPB8 |
| HSPB1 | VAPB |
| POSTN | EVA1A |
| NDRG1 | WDR45B |
| CTTN | HNRNPA2B1 |
| MUC16 | MCOLN1 |
| FBXW7 | ENDOG |
| TGFBR1 | LRPPRC |
| THBS1 | SIGMAR1 |
| TYMS | IFNG |
| ILK | RAB1A |
| FOXA1 | ATP13A2 |
| IDH1 | HTT |
| EP300 | RAB39B |
| MAP2K2 | FOXK1 |
| ERBB4 | PRKAB1 |
| FGFR3 | FOXO1 |
| SPARC | TRIM5 |
| TYMP | DNMT1 |
| BCL2L1 | BAX |
| ZEB2 | CASP8 |
| SATB1 | IL6 |
| EPHB2 | TLR4 |
| TMPRSS2 | SIRT2 |
| KRT7 | ATM |
| VHL | DAP |
| TNFSF11 | FLCN |
| HSPA5 | ATXN3 |
| KLK3 | NUPR1 |
| ANXA2 | PIM2 |
| ARID1A | DAPK3 |
| PROM1 | HDAC1 |
| ALK | MAP1LC3B2 |
| CCL2 | SETX |
| FGF2 | TRAPPC4 |
| TP63 | DCTN1 |
| FGFR4 | TRIM65 |
| GRB2 | SRC |
| ETV4 | GFAP |
| FOXO1 | HSPA5 |
| ITGAV | CTSB |
| LYVE1 | TRIM32 |
| MEN1 | PRNP |
| NTRK1 | MYC |
| FUS | CDKN2A |
| UTP20 | AURKA |
| LCN2 | TNF |
| STAT1 | IL1B |
| DICER1 | PIK3CA |
| RAD51 | VPS39 |
| BMI1 | ALS2 |
| NOS2 | HNRNPD |
| ITGB3 | TMEM208 |
| IDH2 | TBC1D14 |
| AGR2 | HMOX1 |
| RELA | VIM |
| B2M | DNM2 |
| COL1A1 | PSMD4 |
| HTATIP2 | LGALS8 |
| RPSA | FIG4 |
| YBX1 | GRN |
| E2F1 | EWSR1 |
| SOX2 | ASAH1 |
| EPHA2 | BNIP3L |
| MMP12 | RNASEL |
| MAP2K4 | TUG1 |
| ANXA1 | PSMC5 |
| CCNE1 | LMNA |
| MYH9 | RIPK1 |
| LGALS1 | IGF1 |
| CD36 | CXCR4 |
| CD151 | RPS27A |
| SMARCA4 | SNAP29 |
| SIRT1 | VPS18 |
| ENG | LEP |
| KLF4 | BRAF |
| LYPD3 | UBE2D3 |
| JUP | MDM2 |
| SELE | XBP1 |
| MYCN | IL23R |
| F3 | PSMA6 |
| KLF6 | RIPK2 |
| PIK3R1 | VPS33A |
| PKM | TRIM16 |
| BAP1 | VDAC1 |
| LOX | KAT5 |
| IL1B | TSC1 |
| S100B | PHB2 |
| FXYD5 | ATXN2 |
| LAMC2 | TMEM74 |
| SMO | VPS54 |
| PTP4A1 | DNM1L |
| PARD3 | CAV1 |
| ITIH5 | HSF1 |
| AXL | PSEN2 |
| XIAP | PRKAG1 |
| PARP1 | TRIM17 |
| TIMP3 | DAO |
| SKP2 | PIK3CB |
| LEF1 | LGALS3 |
| CCL5 | DIRAS3 |
| CERS2 | UBE2D2 |
| TGFB2 | BIRC5 |
| KRT18 | NPC2 |
| HSP90AA1 | CDKN1A |
| TNFRSF10B | BAD |
| ERBB3 | YWHAZ |
| ITGA6 | HEXB |
| IGF1 | PSMC2 |
| CREBBP | TOLLIP |
| ETS1 | YWHAE |
| NBN | PKM |
| WNT1 | PSMA1 |
| LOXL2 | RETREG1 |
| ITGA5 | TMEM41B |
| SLC2A1 | CFTR |
| CDC42 | CSF1R |
| AMFR | MAPK15 |
| DAPK1 | NOTCH3 |
| AKT2 | CCNF |
| RUNX3 | BNIP1 |
| CD164 | FUNDC1 |
| NF1 | RAB11A |
| PALB2 | DNAH8 |
| TNFRSF11B | TIGAR |
| HOXB13 | MEFV |
| GJB2 | NIPSNAP1 |
| TP73 | CHCHD10 |
| AURKA | RRAGA |
| IL33 | HSP90AB1 |
| NRP1 | TFE3 |
| IGF2BP3 | IFI16 |
| ALDH1A1 | UBE2N |
| CHEK1 | GSK3A |
| PAK4 | NIPSNAP2 |
| PDGFRB | TREM2 |
| FAS | TOM1 |
| CTNNA1 | SPART |
| PDGFRA | NEDD4L |
| BRIP1 | TNFAIP3 |
| LDHA | SNCB |
| ENO2 | CASP9 |
| ROCK1 | ANG |
| SF3B1 | YAP1 |
| CCND2 | PIM1 |
| ITGA3 | DYNC1H1 |
| METTL3 | ABL1 |
| FHIT | AIFM1 |
| BARD1 | BOK |
| STMN1 | AIM2 |
| ANGPTL4 | ZFYVE1 |
| RUNX2 | GBE1 |
| ENO1 | IL10RA |
| AFP | RAB33B |
| F2R | AGER |
| HDAC2 | ANXA11 |
| TCF4 | PON2 |
| PXN | EIF2AK3 |
| CCNB1 | BCL2L11 |
| ST14 | LAMTOR1 |
| YY1 | BSCL2 |
| RASAL2 | TRIM23 |
| TFE3 | AURKB |
| PRKD1 | MTMR3 |
| ZDHHC2 | IKBKB |
| SPOP | NLRX1 |
| HNRNPK | DHRSX |
| TNFRSF1A | PSMB5 |
| SMAD7 | PIK3R2 |
| ESR2 | SORL1 |
| WNT3A | HDAC4 |
| TLR9 | CSNK2A1 |
| PTCH1 | FAS |
| SOX4 | CYCS |
| IL10 | PHF23 |
| PRKCA | PICALM |
| C11orf65 | HDAC9 |
| EPAS1 | TMEM39A |
| CTNND1 | ACBD5 |
| FOXO3 | ATF4 |
| DNMT1 | RAB1B |
| TG | EEF1A1 |
| PMS2 | SNX14 |
| CDKN2B | WDR47 |
| LAMA5 | YWHAQ |
| MAPK14 | DAPK2 |
| CXCR2 | MAP1S |
| ELAVL1 | G3BP1 |
| PIK3CG | USP36 |
| BIRC2 | HDAC2 |
| IL6R | FNIP1 |
| PTHLH | TAF15 |
| MMP10 | TNFSF10 |
| ITGB4 | SPTAN1 |
| ALCAM | PLEKHM1 |
| ANGPT2 | CD44 |
| FOXP3 | IRF3 |
| PNN | CGAS |
| SDHB | VPS41 |
| PTPN11 | TUBA1B |
| GATA3 | TRAF2 |
| ABCB1 | PSMA3 |
| SYP | SMAD4 |
| RASSF1 | S100A8 |
| PAK1 | NEFH |
| FASLG | PRPH |
| MUC4 | UNC13A |
| VCAM1 | RHEB |
| CA9 | ATXN1 |
| MRE11 | CLTC |
| CASP9 | CFLAR |
| CHGA | NOTCH1 |
| SOX9 | STUB1 |
| YWHAZ | WAC |
| NEDD9 | AKT1S1 |
| ALB | HSPB1 |
| CEACAM1 | ITPR2 |
| NTRK2 | RAB23 |
| ID1 | VRK1 |
| ATR | SMAD3 |
| CCN2 | CLN3 |
| JAK1 | RACK1 |
| SOD2 | STK4 |
| CCN1 | UBE3A |
| PTPRK | PIM3 |
| SHH | UCHL1 |
| CD24 | S100A9 |
| FANCD2 | PDCD6IP |
| PDCD1 | LRSAM1 |
| SPINK1 | CTNNB1 |
| BECN1 | WDR6 |
| MGAT5 | DYNLL1 |
| FOSL1 | FHL1 |
| SERPINB2 | ERN1 |
| DKK1 | CHMP4B |
| TGFBR3 | E2F1 |
| PTPRD | MAOA |
| ATF1 | HRAS |
| FASN | RAB33A |
| S100A6 | DCN |
| NUPR1 | TRIM13 |
| YWHAE | VDAC2 |
| NME2 | BBC3 |
| RACK1 | XIAP |
| GJA1 | TOMM20 |
| NCAM1 | EP300 |
| L1CAM | RAB12 |
| POU5F1 | ATF6 |
| LRP6 | PRKAG2 |
| ACKR3 | RB1 |
| LGALS3BP | SH3BP4 |
| NF2 | PRKDC |
| HMMR | HSPA4 |
| BMP6 | ATP6V1A |
| TNFRSF11A | WASHC1 |
| TCF3 | CEBPB |
| TNFAIP8 | TUBB4B |
| IL18 | VPS16 |
| IGF2 | TSG101 |
| EFNA1 | PANK2 |
| MGMT | TMEM150B |
| KDM1A | PIK3CG |
| RRM1 | MYO6 |
| SMARCAD1 | OPA1 |
| CLU | UBA52 |
| CASP8 | PON1 |
| CTSE | KIF5A |
| HMGA1 | GLE1 |
| DCC | TANK |
| TGFA | CXCL8 |
| PTTG1 | RAB18 |
| SF3B3 | YWHAB |
| MMP16 | PIK3R1 |
| MED1 | CRY1 |
| EIF4E | GAPDH |
| ING4 | CASP7 |
| MST1R | JUN |
| TGFB3 | CBS |
| ALOX12 | HFE |
| MAPK8 | STIM1 |
| SOS1 | RNF185 |
| FANCC | BIRC6 |
| PDGFB | UBB |
| CCDC88A | VPS11 |
| CCDC25 | RNF166 |
| MUTYH | RETREG3 |
| CLDN1 | YWHAG |
| IGFBP3 | PSMB4 |
| ARRB1 | CDKN1B |
| PDCD4 | EPAS1 |
| VTN | ITM2B |
| DES | ITGB1 |
| MAP3K7 | TMEM199 |
| ITGA2 | MAP1B |
| AGER | INSR |
| WNT2 | RRAGB |
| KRT8 | RAF1 |
| CDH17 | FADD |
| CDX2 | SIRT6 |
| MSN | PMAIP1 |
| IL17A | STX5 |
| GFRA3 | ITGB4 |
| PECAM1 | WNK1 |
| PPARG | CCDC115 |
| IL1A | CHMP2A |
| TLR3 | TXN |
| TNC | HTRA2 |
| PTPN3 | YY1 |
| CCNA2 | EIF4EBP1 |
| CFL1 | EIF2AK4 |
| SELP | RELA |
| PPP2R1A | PEX5 |
| IGFBP2 | CASP1 |
| HSPD1 | IGF1R |
| CALCA | ATP5F1A |
| KDM3A | FNBP1L |
| GDF15 | NEK1 |
| LAMP1 | IMMT |
| EPHB4 | NEDD4 |
| TOP2A | ATP12A |
| MME | ACER2 |
| ARMC12 | BCAP31 |
| HMOX1 | USP20 |
| GNGT1 | RAB39A |
| MUC2 | NLRP1 |
| BTRC | PABPC1 |
| CXCL1 | RRAGC |
| RAF1 | FN1 |
| JAK2 | ATP2A2 |
| MED19 | PDCD4 |
| CDK2 | EIF5A |
| PRKACA | RAB21 |
| F2RL1 | RRAGD |
| TRIM28 | PRKAR1B |
| TFF1 | TMPO |
| MITF | SESN2 |
| NAA10 | PGAM5 |
| CXCR3 | BCAS3 |
| MSR1 | MFN1 |
| PRMT5 | EPHB2 |
| GNAQ | BSN |
| FANCA | HMGA1 |
| CTSL | BAK1 |
| AXIN2 | SUPT20H |
| SPHK1 | PLEKHM2 |
| KRT14 | ELP3 |
| GSTP1 | VDAC3 |
| POLD1 | ITPR1 |
| SRD5A2 | TUBA1C |
| SDCBP | VHL |
| CD276 | CCAR2 |
| S100P | DDIT3 |
| KLK6 | TNFSF11 |
| IFI27 | RAB5C |
| DVL1 | FOXK2 |
| FOXC2 | RSL1D1 |
| STUB1 | JAK2 |
| CSF3 | CLEC16A |
| ADAM10 | TNFRSF10B |
| MIF | LARP1 |
| CASR | USP14 |
| MAPK10 | EIF2S1 |
| RLIM | BIRC2 |
| KLF17 | HEXA |
| MMP8 | MAP2K1 |
| TCF7L2 | APOB |
| IDO1 | HDAC7 |
| HSPA4 | OGT |
| KMT2D | RIPK3 |
| WASF3 | MAP3K7 |
| NT5E | TBC1D17 |
| COPS6 | ERBB4 |
| S100A1 | TBP |
| IQGAP1 | CHRM1 |
| EGR1 | ABCA7 |
| ABCE1 | DPP6 |
| NES | PON3 |
| HBEGF | TYROBP |
| ABCC4 | TIMM8A |
| LRP5 | SRCAP |
| PTK2B | SS18L1 |
| CDK12 | ARHGEF28 |
| TLR2 | FGGY |
| VCAN | MCOLN3 |
| NCL | HDAC8 |
| BIRC3 | UBE2V1 |
| TRAF6 | DYNLL2 |
| IL32 | TUBB3 |
| BCOR | MITF |
| IGF2BP1 | EIF4G2 |
| PARK7 | NCL |
| ANPEP | TNFRSF1A |
| S100A11 | CSNK2B |
| CKAP5 | ABCE1 |
| MMP15 | ERBB2 |
| CSF1 | MTDH |
| AHNAK | HNRNPK |
| CCL21 | PTPN22 |
| NFKBIA | CSNK2A2 |
| APEX1 | BIK |
| CYP19A1 | SEC24C |
| CREB3L1 | CUL3 |
| MUC6 | NR4A1 |
| MTBP | TLR9 |
| BACH1 | MYH9 |
| PLK1 | HK2 |
| RAD51D | CAMKK2 |
| CST7 | DENND3 |
| HAS2 | ELAVL1 |
| IBSP | RAB9A |
| SLPI | PHGDH |
| USP28 | PLIN3 |
| DLL1 | IRF1 |
| S100A14 | JMY |
| SIX1 | EIF5 |
| ERCC1 | OFD1 |
| WWTR1 | ACSS2 |
| RAD50 | CANX |
| PGF | PRKAB2 |
| PRKDC | MAPK3 |
| TGM2 | UBE2L3 |
| ING1 | CCT3 |
| NUMB | SEC16A |
| S100A2 | HSP90B1 |
| RAD51C | WNT5A |
| GRP | VPS4A |
| NRG1 | LMNB1 |
| CTSK | NPM1 |
| U2AF1 | FNIP2 |
| NETO2 | CPTP |
| NRP2 | TFRC |
| NR4A3 | RBX1 |
| HNRNPA1 | ITGB3 |
| S100A9 | RNF5 |
| SKIL | PAWR |
| PGK1 | IKBKE |
| CAND1 | NCOA4 |
| TXN | TUBA1A |
| AKAP9 | RETREG2 |
| LIMK1 | AP2M1 |
| PPP2R2A | MET |
| NTN4 | KPNB1 |
| THBS2 | BANF1 |
| TSC2 | NPRL2 |
| GPI | UBAP1 |
| SERPINF1 | PIKFYVE |
| FOS | EEF2 |
| SOCS1 | PLIN2 |
| WT1 | MTMR9 |
| BLM | SERPINF1 |
| PYHIN1 | MAPK9 |
| HSP90B1 | VPS35 |
| HSP90AB1 | TPCN2 |
| WNT7A | TBKBP1 |
| EPHB6 | MFSD8 |
| CDK1 | SIRT3 |
| CDH3 | RAB35 |
| CDH5 | LDHA |
| CHD1 | PSIP1 |
| ADAM9 | KHDRBS1 |
| TNFSF10 | FKBP8 |
| TCF12 | WDFY4 |
| CHI3L1 | TNPO1 |
| NGFR | TUBB6 |
| UCHL1 | SKP1 |
| FAP | PFKP |
| LRP1B | ANXA5 |
| VEGFB | RAB8B |
| PROX1 | SLC35D3 |
| BCAR1 | AR |
| ACTN4 | XPO1 |
| CCR6 | COL1A1 |
| MUC5AC | PSMC4 |
| ASPSCR1 | LGALS1 |
| LGR5 | RAN |
| CLDN7 | SGPP1 |
| MIEN1 | EIF4B |
| PELP1 | TM9SF1 |
| FZD7 | CTSL |
| NPM1 | DNAJA3 |
| RHOD | MAVS |
| CXCL10 | PIK3C2A |
| TFAP2A | IL10 |
| IRS1 | CDK1 |
| CDH11 | OLR1 |
| TTK | UBR4 |
| MMP17 | ANXA1 |
| TJP1 | PPP2CA |
| ZKSCAN1 | CCT8 |
| GPAT3 | ISG15 |
| TACSTD2 | IL6ST |
| WNT7B | EEF2K |
| KLF8 | VPS29 |
| FZD2 | PPP1CA |
| TNFRSF8 | IFT88 |
| WNT11 | COPB1 |
| FPR1 | NDRG1 |
| RAN | PGK1 |
| CUL1 | ITGA3 |
| DAB2IP | DAXX |
| BMP4 | RAB2A |
| PIK3R3 | TRAPPC8 |
| SHC1 | MYCBP2 |
| CLPTM1L | BID |
| FANCL | FLNC |
| ARTN | TRIM11 |
| GRWD1 | RAB38 |
| ATRX | PDPK1 |
| CEACAM3 | MYD88 |
| ALPP | RAB13 |
| HNRNPA2B1 | TLK2 |
| TXNIP | RASIP1 |
| DLC1 | PSMD2 |
| ADAM17 | RAB26 |
| ACTC1 | CAPNS1 |
| CLDN4 | GOPC |
| RORA | GSN |
| HSPA8 | GNE |
| LEP | HSPA9 |
| KLHL20 | NLRP6 |
| SYK | TMBIM6 |
| NNMT | KIF25 |
| INTS3 | WWOX |
| MAML1 | XRCC5 |
| GPR55 | TRIM22 |
| SCUBE3 | GOLGA2 |
| KEAP1 | RASA2 |
| HK2 | ATP6V1B2 |
| FYN | SPATA33 |
| PRKAR1A | UPF1 |
| SALL4 | TRAF3 |
| BMP7 | SLC3A2 |
| PRKAA1 | TTR |
| ENPP2 | SCFD1 |
| DNMT3B | IL17A |
| AREG | TOMM22 |
| DDR1 | MLKL |
| ZFHX3 | FMR1 |
| SRA1 | ITGA5 |
| KDM4B | LAMP3 |
| SETD2 | NOP56 |
| WRN | PPP1R15A |
| GAPDH | RNF186 |
| MYO18A | DYNC1LI2 |
| PTPRC | TCP1 |
| PRKCI | SMAD1 |
| PIN1 | EIF2AK2 |
| SFN | HNRNPU |
| KDM5D | STK3 |
| DDX5 | LAMTOR3 |
| FZD8 | CCT2 |
| SQSTM1 | IL6R |
| XRCC1 | RNF41 |
| PTAFR | UBE3C |
| ATF3 | HNRNPA3 |
| SST | CKAP4 |
| FLNA | FLNA |
| WNT10B | GBP1 |
| HDAC6 | SETD2 |
| LPAR1 | HNRNPM |
| CDC73 | PLK1 |
| JAG1 | TGM2 |
| DDX3X | PI4KB |
| USP48 | MFF |
| ASPH | YWHAH |
| TGFBI | HNRNPH1 |
| GNB3 | SHOC2 |
| CLCA2 | NUP62 |
| CDK6 | HSPA1A |
| MSH3 | MTMR8 |
| FOXQ1 | SNX30 |
| CSTA | RAB14 |
| S100A8 | MMP14 |
| ADRM1 | NUP205 |
| CXCL5 | TRAP1 |
| GSN | ATP6V1G1 |
| CCR5 | ATP1A1 |
| MAP2K3 | SNX4 |
| ANXA5 | SYT11 |
| NRCAM | CSNK1A1 |
| THBS4 | PCNA |
| EHMT2 | BHLHE40 |
| TEK | BMF |
| MED12 | SFPQ |
| BUD23 | ANXA7 |
| WNT5B | PEA15 |
| KRT5 | FBXW7 |
| CDKN3 | CHUK |
| GSTM1 | ACIN1 |
| MSLN | TLR3 |
| PPFIBP1 | BMI1 |
| SNCG | ANXA2 |
| ABI3 | USP30 |
| HIP1 | EPHA3 |
| ABCG2 | SIDT2 |
| MAP2K5 | TUBA8 |
| HSPA9 | TUBB |
| IL13RA2 | CPT2 |
| C6orf132 | RAC1 |
| DCN | ARG2 |
| ACTB | MALT1 |
| CADPS | S100A4 |
| SOD1 | MAP1A |
| IGF2BP2 | CDK5 |
| MAP2K6 | DYNC1I1 |
| CD47 | RAB24 |
| MUC17 | DIABLO |
| PALM2AKAP2 | FAF1 |
| PPARGC1A | MAP3K5 |
| DPP4 | COPZ1 |
| COPS5 | SUMO1 |
| TAF15 | NAMPT |
| TSPAN5 | LARS1 |
| PPP6R2 | SPARC |
| MYCL | EPHB3 |
| RPS6KB1 | BCL2L2 |
| PEAK1 | METTL3 |
| ABCC1 | ESR2 |
| ANGPT1 | TAB2 |
| LAMC1 | COMT |
| ECM1 | RMC1 |
| PPP2CA | FXR2 |
| PTBP1 | SDCBP |
| SORBS1 | CCT4 |
| YTHDC2 | ZC3H12A |
| RPL10L | DEPDC5 |
| CCNG1 | KPNA2 |
| TLN1 | PTRH2 |
| ADRB2 | BCL2L10 |
| CCL7 | CREG1 |
| SOCS3 | BMPR2 |
| IKBKB | LMNB2 |
| VCP | TMED10 |
| CD34 | LDHB |
| CCL20 | SH3BGRL |
| TRIP12 | GRAMD1A |
| HAVCR2 | CHEK2 |
| PIK3CB | CASP4 |
| MACF1 | ACTB |
| PTGER2 | IARS1 |
| CX3CR1 | PPARA |
| SDC1 | TP53BP2 |
| PRMT1 | PSMB8 |
| ROCK2 | HDAC5 |
| FZD4 | ROCK1 |
| BMPR1A | ATP6V1C1 |
| NCOA3 | KDM4B |
| FUT3 | LAMTOR2 |
| USP7 | CSF1 |
| CXCL2 | AVEN |
| XRCC6 | CLOCK |
| GRK3 | MAP2K3 |
| PRDX1 | IL24 |
| GRK2 | RNF213 |
| STYK1 | HSPD1 |
| ITGA4 | CLU |
| NUAK1 | SBF1 |
| FANCM | DDX5 |
| TET1 | DDB1 |
| RRP1B | EZH2 |
| LIFR | RPS3 |
| GNA12 | RAB6A |
| BMP2 | PIR |
| GNB2 | PRKCI |
| DDR2 | SNRNP70 |
| MYLK | EIF4A3 |
| PTPN21 | CCT7 |
| FOXC1 | PLIN4 |
| GAST | LRRC25 |
| CTBP1 | PTBP1 |
| TFG | SCOC |
| MYCBP2 | MYL6 |
| WWOX | CCT6A |
| NOTCH3 | STAT1 |
| LATS2 | NEFM |
| TWIST2 | ARMC3 |
| IL11 | SMAD5 |
| PPP1R26 | SCD |
| S100A7 | SLC25A3 |
| ITGAD | RAB10 |
| LASP1 | EIF4G1 |
| LRRC56 | VAPA |
| CX3CL1 | CHEK1 |
| PODXL | RMDN3 |
| AKT3 | RICTOR |
| FAM3C | ING1 |
| STC1 | NR1D2 |
| VWF | MARS1 |
| ERG | USP22 |
| RAP1A | RPS4X |
| KLF5 | ACE2 |
| POLE | FAF2 |
| CRK | BMP4 |
| TRIM21 | SPHK1 |
| MYB | CHMP3 |
| FZD1 | TOMM70 |
| EDN1 | COPA |
| NFIB | YBX1 |
| AHR | RAB4A |
| PDE7B | IPO8 |
| PHF2 | TPM1 |
| BRF2 | SMAD2 |
| LTF | DNAJC7 |
| GNA13 | WDR24 |
| KLK7 | BST2 |
| CCR1 | SIK2 |
| TUBB | VPS13D |
| TGIF1 | TRPM2 |
| GNB1 | TRIM50 |
| VCL | NAPA |
| GOLM1 | VPS13A |
| DLL4 | UBE2D1 |
| FABP5 | ARFIP2 |
| ASAP1 | SERPINA1 |
| SENP1 | CUL4B |
| CALR | RPL4 |
| BRD4 | PAK1 |
| NFATC2 | P4HB |
| POLR2A | THBS1 |
| PRSS1 | FOXM1 |
| CSF2 | SPP1 |
| RYBP | CD274 |
| GABRB2 | ATP6V0C |
| SCN11A | GJA1 |
| ARHGEF15 | PSMC1 |
| MYO16 | RNF2 |
| UNC79 | RARS1 |
| PSCA | VPS51 |
| GPC3 | AKT2 |
| ERLEC1 | CTSA |
| GNA11 | HSPA1B |
| ANO1 | UBA1 |
| TSPAN32 | PPARG |
| EBAG9 | FURIN |
| SOCS2 | RUNX2 |
| CXCL14 | HDAC3 |
| SELL | DDX3X |
| ITGA7 | ITGAV |
| TOP1 | BIRC3 |
| EREG | GDF15 |
| LATS1 | FTH1 |
| SLC3A2 | BICD2 |
| ANXA3 | ATP6AP2 |
| SLIT2 | RPS2 |
| CHGB | UBTF |
| KAT5 | KRT18 |
| PTGER4 | EMD |
| RARB | MARCHF7 |
| BUB1B | TRIM59 |
| MBD3 | TTN |
| ACKR1 | CALR |
| CXCR6 | ESR1 |
| SMARCB1 | CCR5 |
| LMNA | RPLP0 |
| PPP2R5C | KDM1A |
| SND1 | PPP2R1A |
| CCL18 | PSMD3 |
| CADM1 | CCND1 |
| RAD51B | HADHA |
| CEBPB | TRIM28 |
| VTCN1 | CKB |
| CTHRC1 | ZRANB1 |
| NONO | TUBB4A |
| EDNRA | SLK |
| ABCF3 | ATXN7 |
| ATP2B4 | EPHA2 |
| FOXA2 | JAK1 |
| UMPS | RPL23A |
| HSPA1A | ORMDL3 |
| DSP | HNRNPC |
| CCR2 | TP73 |
| CBL | DHX9 |
| ZMYND8 | ARL13B |
| C3AR1 | RUVBL2 |
| SLC16A1 | PCM1 |
| HDAC3 | PSMC6 |
| SRSF1 | RAB5B |
| TFF3 | MTHFD1 |
| KDM6B | IGF2R |
| RETREG2 | TIAL1 |
| CHKA | DCP2 |
| BIRC7 | NSF |
| GNG12 | SKP2 |
| CSNK2A1 | TRIB3 |
| ARHGDIB | PRPF8 |
| NEK9 | TRAF4 |
| POU5F1B | HIPK2 |
| PRRX1 | PIK3CD |
| HNF1B | DDX17 |
| MED23 | TRADD |
| G3BP1 | HERC1 |
| GLI2 | KCMF1 |
| DNMT3A | FLT3 |
| RICTOR | RAB6B |
| E2F4 | TEX264 |
| KHDRBS1 | PYCARD |
| ZG16B | KAT8 |
| SUZ12 | SLC25A13 |
| CLDN3 | DDX1 |
| TFRC | FKBP4 |
| PIK3R2 | SPRED2 |
| PRKAR2A | SLC2A8 |
| MAP1LC3A | RBMX |
| INHBA | DNAJA1 |
| RNASEL | RPS16 |
| TNFRSF10A | SLC52A3 |
| NOS3 | RRAS |
| PRL | REEP1 |
| CD63 | SLC52A2 |
| SIRT3 | SCAF4 |
| TRPM7 | RPS23 |
| NTRK3 | FUNDC2 |
| THY1 | BRD4 |
| RAD54L | PTPN11 |
| SIN3A | DDX6 |
| ALDOA | STBD1 |
| NDRG2 | ATP6V1E1 |
| EEF1A1 | ATP5F1B |
| SATB2 | RPS28 |
| AGO2 | TMEM106B |
| APOE | CHMP6 |
| TUBB3 | FBP1 |
| HPN | AZI2 |
| FZD3 | IKBKG |
| MDK | IMPDH2 |
| NOTCH2 | DNAJB1 |
| MCL1 | CDC37 |
| TRPM3 | GNL3 |
| ARAP3 | ALDH2 |
| DSCAML1 | CASP2 |
| LAMP2 | GRB2 |
| TPD52 | HNRNPH2 |
| CEACAM6 | MYO1C |
| CD40 | HSD17B12 |
| NQO1 | PPP3CB |
| HNF4A | HAX1 |
| USP6 | SLC37A4 |
| HSF1 | FASN |
| XRCC5 | DDOST |
| RALA | APAF1 |
| ADGRB1 | NUAK2 |
| MRPL47 | CTSK |
| ROS1 | MCM7 |
| RPS6 | NDRG2 |
| RAB5A | ZDHHC12 |
| TKT | PIP4K2A |
| CSF1R | ITGB2 |
| WNT9A | CAD |
| FLOT2 | RPS15A |
| TRIM25 | MYBBP1A |
| CEMIP | AHR |
| NELL1 | CREBBP |
| DDX17 | LBR |
| PTPA | IGFBP3 |
| TLR7 | BCL10 |
| PFN1 | XRCC6 |
| SLC9A1 | TBC1D15 |
| ACP3 | TSPAN8 |
| FOLH1 | SYNPO2 |
| RHOBTB2 | CHCHD3 |
| EPHA3 | LYPLA1 |
| TFPI2 | NR1H4 |
| METTL14 | GLA |
| PSMD10 | DCAF12 |
| PBRM1 | RPLP2 |
| KPNA2 | RPL7A |
| VDR | NRAS |
| PALLD | CUL4A |
| RECQL4 | EPHB4 |
| SERPINA3 | SERPINE1 |
| TRIM29 | RAB27A |
| CYSLTR1 | ADAM12 |
| MRPL40 | EPHA7 |
| ARHGEF2 | DFFA |
| MYD88 | DIDO1 |
| EPHA1 | RAB25 |
| MTHFR | TICAM1 |
| MMP28 | PLEKHF1 |
| MGST1 | SEC23A |
| EXOC2 | GPR137B |
| WDR5 | GPR137 |
| ABCB5 | TUBB2A |
| BTG2 | TOMM5 |
| EEF1A2 | PANX1 |
| TPBG | CTF1 |
| MAP1LC3B | FBXO7 |
| RBBP4 | PSMB9 |
| CUL3 | HDAC11 |
| SETDB1 | EPM2A |
| CRYAB | MOAP1 |
| PBK | NUP93 |
| SIK1 | TRAPPC5 |
| BCAS3 | PCBP1 |
| CFTR | IL2RA |
| CD81 | MAPK10 |
| FOXO4 | BIRC7 |
| SPDEF | STK17B |
| GOLPH3 | CHMP7 |
| LAMA4 | CHMP4C |
| SMAGP | PAICS |
| MCM2 | COPB2 |
| MAD1L1 | TXNIP |
| PDGFA | GANAB |
| ROBO1 | PRMT5 |
| STC2 | MT2A |
| PRAME | UFL1 |
| ERCC4 | PSMC3 |
| EPHB1 | RPS17 |
| SERPINA5 | TLR2 |
| MCM3 | TBC1D25 |
| ERCC2 | PSAP |
| ARNT | RTCB |
| MMP24 | DSC1 |
| HNRNPD | PDIA6 |
| XPO1 | ZMPSTE24 |
| CHAC1 | TERT |
| SPATA18 | TSPO |
| LAMB1 | SPTLC1 |
| CYCS | SNAP23 |
| TLR8 | NFATC1 |
| GRK5 | GZMB |
| MLANA | FERMT2 |
| C1QBP | CDIP1 |
| TMPRSS4 | GNB2 |
| SRF | RPA1 |
| MMP21 | TAB3 |
| GPR68 | CD40LG |
| IER2 | RAB41 |
| PHGDH | STRIP1 |
| RDX | SLC2A1 |
| SPOCK1 | PRKCD |
| WNT2B | CCT5 |
| LGALS9 | SND1 |
| HAS1 | TUBB2B |
| CDH13 | PROM1 |
| PHOX2B | SLC25A6 |
| CORO1C | RPL7 |
| FZD5 | HACD3 |
| ELAC2 | LRRC59 |
| SIPA1 | HGF |
| WFDC2 | CXCL1 |
| LMNB1 | IGFBP5 |
| FLI1 | COL10A1 |
| IL1RN | TNFRSF12A |
| TMSB4X | TNFSF12 |
| USP22 | URI1 |
| ARID1B | VAMP7 |
| EPOR | CHMP4A |
| HNRNPC | SIRT5 |
| ADAM15 | PSMD11 |
| FZD6 | ALKBH5 |
| AQP1 | SUPT16H |
| AXIN1 | RPS3A |
| FANCF | DDIT4 |
| OSM | PRDX2 |
| ODC1 | VTI1B |
| CDK5 | TRAPPC1 |
| PRDX2 | FARSB |
| TRAF2 | TNFRSF11B |
| PTGS1 | CAPRIN1 |
| SFPQ | ZDHHC19 |
| GAL3ST2 | BCL2A1 |
| CRMP1 | TFAP2C |
| SERBP1 | BSG |
| TAGLN | ACLY |
| HNRNPM | CDK7 |
| PDPK1 | C1QBP |
| BDNF | RPS6 |
| ATF4 | ERLIN2 |
| CHUK | RPS9 |
| PIAS3 | PIN1 |
| SSTR2 | SBF2 |
| ATP5F1A | UQCRC2 |
| CYSLTR2 | DVL2 |
| RNF43 | ACACA |
| ADM | CLINT1 |
| VDAC1 | AP2A1 |
| MAD2L1 | ACAT1 |
| FADD | CTSS |
| KCNJ4 | GNAI3 |
| MAGI2 | HGS |
| MYRF | PRPF19 |
| TSHZ3 | SEC61A1 |
| CDKN2AIP | RPS5 |
| AGBL4 | EPHA1 |
| MST1 | IL15 |
| EIF5A2 | RAB30 |
| RUNX1 | TMEM43 |
| TLR5 | IL13 |
| CD80 | TBC1D1 |
| STK33 | RUVBL1 |
| ACLY | KL |
| SIRT7 | INA |
| ATF2 | FBXL2 |
| CAPNS1 | RPSA |
| MRTFA | AHCY |
| CD163 | SSRP1 |
| GZMB | RPL18 |
| IGFBP7 | FIS1 |
| PRKAR2B | EXOSC2 |
| LGMN | LONP1 |
| E2F3 | PRDX1 |
| TPT1 | ACO2 |
| MAPK7 | PPARGC1A |
| IFNGR1 | RPL3 |
| CLIC1 | RPS7 |
| ARHGDIA | GDI2 |
| SIRT2 | CTSC |
| IGFBP5 | TWNK |
| PTPN6 | EPRS1 |
| KRT17 | FASLG |
| PMS1 | NUP160 |
| DKK3 | RGS19 |
| RBBP8 | MYO1B |
| CIC | CCPG1 |
| TPX2 | NCOA3 |
| MVP | RPL8 |
| INSR | VPS45 |
| NEDD4 | UBXN6 |
| PSMC4 | SMC3 |
| PDK1 | HADHB |
| NCOR1 | PGD |
| SEMA3F | PNO1 |
| TPM3 | ENO1 |
| HDAC9 | KIF5B |
| CDC25A | JUP |
| LIF | RPS27 |
| ALKBH5 | MTMR2 |
| PPIA | ACTN4 |
| SOX10 | BAG2 |
| RBX1 | PML |
| RBBP7 | SLC25A12 |
| EIF4EBP1 | HBB |
| EHBP1 | TUBAL3 |
| ARHGEF25 | ATP6V0D1 |
| APAF1 | RPS19 |
| ADAMTS1 | RPL13A |
| ADAM12 | EIF3A |
| PCBP1 | RANGAP1 |
| STOML2 | PLAC8 |
| STAT6 | AP2B1 |
| ESRRA | NQO1 |
| SLC7A11 | WNT16 |
| KLF9 | FAIM |
| ATAD2 | SLC25A5 |
| CDKN1C | CSDE1 |
| GATA6 | EEF1D |
| KCNN3 | GCN1 |
| PREX2 | PRRC2C |
| THBS3 | STX12 |
| DHX29 | MBNL1 |
| CTBP2 | IFT20 |
| CIP2A | IGF2BP3 |
| RAB25 | TBC1D7 |
| CNTFR | VPS33B |
| NIPA2 | CYC1 |
| FAM13C | IPO5 |
| CXCL13 | ATP6V1H |
| PDCD1LG2 | PTK2 |
| PRUNE1 | RPN2 |
| UBE2V1 | TNIP1 |
| GAS6 | EFTUD2 |
| ITGA1 | RPL27 |
| CXCL16 | PCLAF |
| ID2 | NUP155 |
| CDC20 | PFKFB3 |
| CEBPD | GMPS |
| RRM2 | TFAM |
| CDK5RAP3 | VPS26A |
| TLR6 | CDK5RAP3 |
| YWHAQ | TPM2 |
| MRC2 | H2AX |
| GPX3 | POLRMT |
| ACE | LMAN1 |
| EFNB2 | CD4 |
| KAT7 | WARS1 |
| ADAMTS3 | CUL1 |
| ARG1 | PXN |
| PSAT1 | RPL6 |
| IRS2 | STX7 |
| TSPAN8 | U2AF1 |
| SFRP1 | NEK9 |
| ETV1 | MAP4 |
| FGF7 | TOP2A |
| RPS6KA3 | SLC16A1 |
| CASP1 | STMN1 |
| ILF3 | CACYBP |
| FH | ALDOA |
| AIFM1 | TRPM7 |
| FUT4 | RAB11B |
| P4HB | USP7 |
| EPRS1 | SEPTIN9 |
| CCNA1 | DICER1 |
| PIWIL1 | ITGA2 |
| CXCR1 | ARG1 |
| TUBA1B | EEF1B2 |
| RPL4 | USP9X |
| TRRAP | SP1 |
| TRPC4 | ERGIC1 |
| SLC8A3 | ATP5F1C |
| ING3 | GLS |
| MRPL46 | PDK1 |
| ANO9 | FTL |
| MXRA5 | RPA2 |
| ARF6 | DYNC1LI1 |
| NR2F2 | DMXL2 |
| MB | PCBP2 |
| HP | PI4K2A |
| USP10 | SRSF7 |
| CTLA4 | NFKBIA |
| RAB27B | TRPV1 |
| TSC1 | FHL2 |
| EEF2 | CSTB |
| TPI1 | EHMT2 |
| GNG4 | PPP1R12A |
| SMARCA2 | CAND1 |
| MARCKS | NAT10 |
| FGF1 | ZC3HAV1 |
| CANX | ITGA6 |
| PLOD2 | PSMA7 |
| PIK3CD | QARS1 |
| SPINT2 | CD84 |
| PRKCE | RPS14 |
| AKAP12 | GTPBP4 |
| KITLG | TJP1 |
| YTHDF2 | SNRPD1 |
| FGF4 | ATL3 |
| DNM2 | TRAPPC11 |
| CAPZB | NHLRC1 |
| CNTN1 | RTN3 |
| PMEL | TRIM6 |
| NGF | NUMB |
| CDH6 | PSMD13 |
| SLC7A5 | LGALS9 |
| EIF4A1 | NUP107 |
| EIF4G3 | ZNF418 |
| AKAP1 | UQCRC1 |
| MXI1 | RPS11 |
| ATG13 | SMURF1 |
| SIGIRR | TRIM8 |
| WDFY3 | DDX39A |
| SCRN1 | MYH10 |
| DGCR6L | MTMR4 |
| PCDHA4 | RPN1 |
| ZNF304 | PDIA3 |
| TNK2 | BTRC |
| IL15 | NOP58 |
| KRT9 | DSG2 |
| CREB3L2 | DDX54 |
| USP11 | PCNT |
| RAB27A | SEC62 |
| PLCG1 | MIF |
| MCM7 | UTRN |
| UBC | CDK6 |
| KRT10 | SEC23B |
| CST6 | SEC24B |
| PROS1 | PES1 |
| ETS2 | AP1M1 |
| ETV7 | IDH2 |
| KRT1 | RRP12 |
| ITGB2 | SAFB |
| PRDX6 | RPL18A |
| FHL2 | TKT |
| BGLAP | DARS1 |
| SKP1 | GART |
| KRT13 | CD47 |
| STAT5A | MAT2A |
| BAG1 | GBF1 |
| UBE2S | STK38L |
| PRMT7 | LRP1 |
| EDNRB | ACTG1 |
| HK1 | ACTR2 |
| CTSS | PKD2 |
| CFLAR | TP63 |
| ABCG4 | RPS24 |
| CABIN1 | RPL23 |
| SMUG1 | SGPL1 |
| PRSS22 | TMEM192 |
| DPPA4 | ING2 |
| PCDHA2 | RCN2 |
| SSBP2 | NAP1L1 |
| PCDHA10 | FH |
| PCDHA5 | ABCD3 |
| PCDHA6 | RPL37A |
| PCDHA7 | ILF3 |
| URB2 | GFPT1 |
| ZNF100 | TOP2B |
| THSD7B | XPOT |
| H3C11 | SERBP1 |
| ZNF717 | SERPINB5 |
| SERPINH1 | SLC39A1 |
| CRABP2 | PPIA |
| SKI | RPL13 |
| CDC6 | ZFYVE26 |
| ANG | RPL11 |
| USP20 | HUNK |
| SMYD3 | OSBPL8 |
| TET2 | CCDC47 |
| CD68 | VDR |
| ALDH1A3 | EIF2S3 |
| MDM4 | HNRNPF |
| CALB2 | BAG1 |
| RUVBL1 | FBXW11 |
| EMP1 | ELOB |
| CSK | GPX4 |
| ACVR1B | RAP1A |
| RARS1 | LITAF |
| CCN4 | STAU1 |
| NUSAP1 | MST1 |
| AURKB | CSE1L |
| PIM1 | PABPC4 |
| U2AF2 | RPL14 |
| ACP5 | SSBP1 |
| WIF1 | DYNC1I2 |
| LEPR | GARS1 |
| SDHA | PDE4A |
| MTHFD1 | SLC7A5 |
| VAV3 | PIP4K2C |
| SOX11 | NCOR1 |
| HOXB7 | PLEKHG5 |
| FLNB | FTO |
| NOX4 | CIP2A |
| DNAI3 | ENPP1 |
| TPM1 | CAT |
| UHRF1 | STT3A |
| SCD | GLG1 |
| ACTR2 | MTCH2 |
| PDIA3 | PTGS2 |
| NR4A1 | UHRF1 |
| PRKACB | EGR1 |
| LYN | PTPA |
| CST3 | ATN1 |
| HES1 | DEK |
| HDGF | SNRNP200 |
| CCL22 | RABGAP1 |
| TKTL1 | WDR1 |
| EEF1D | MGMT |
| PFKFB3 | H3C1 |
| HDAC4 | METTL14 |
| TRIM24 | EEF1A2 |
| PLEK2 | LETM1 |
| ITGB5 | AGK |
| NEK2 | BRCA1 |
| COX5A | HSD17B10 |
| TRAP1 | RALB |
| LTA | RRM1 |
| CCL19 | AIF1 |
| LRP1 | CCNY |
| ZNF217 | TMEM33 |
| OGG1 | PSMD12 |
| MAP2K7 | NEDD8 |
| LIMA1 | SRSF2 |
| SERPINE2 | PTPN2 |
| UBE2C | IL10RB |
| CYP1A1 | KLHL22 |
| LAMB2 | TOP1 |
| OLFM4 | PSMA2 |
| LGR4 | PELP1 |
| TRIM33 | TECR |
| FANCG | IL37 |
| GSTM3 | IDO1 |
| JAG2 | FABP5 |
| CSE1L | NOS2 |
| SMURF2 | SIRT7 |
| CTSF | TNFAIP8L1 |
| INHA | ASS1 |
| CD55 | RPL15 |
| ETV5 | TRIP13 |
| RXRA | RPL17 |
| CD74 | EIF3L |
| PSAP | TPX2 |
| PVR | KRT8 |
| GPX4 | ILK |
| SDHD | GLUD1 |
| RPS3 | FBXW5 |
| FST | MTHFD1L |
| ACTN1 | KLHL20 |
| YWHAG | FLNB |
| GPNMB | ASPH |
| DLX4 | RRM2 |
| KDM5B | COL18A1 |
| SLC2A3 | RTN4 |
| FANCE | SEC22B |
| PRKCZ | CFL1 |
| SLC6A9 | MAPRE1 |
| GRM8 | PSMA5 |
| ATP6V0A1 | YTHDF2 |
| ENTPD3 | RPL21 |
| PKD2L1 | RAB15 |
| POLK | IFI30 |
| SLC13A3 | AZGP1 |
| SYNGR1 | MTMR6 |
| TBX20 | CCNB1 |
| CBY1 | NDUFA13 |
| PDP2 | KDM4A |
| SORCS1 | KAT2B |
| STX8 | AGO2 |
| GDF10 | DAPL1 |
| NAPB | TGFBRAP1 |
| PODN | PPP1R13L |
| PPP1R3C | DHX30 |
| STRADB | IL33 |
| SV2B | USP5 |
| ABRAXAS1 | SVIP |
| ADAT1 | C3 |
| DIS3L | TRAPPC12 |
| DNAH9 | DST |
| ENOX1 | GYS1 |
| ENPP7 | PSMA4 |
| GEN1 | HSPB6 |
| OXA1L | SRSF3 |
| PIGH | NDUFA10 |
| RPS6KC1 | BRIX1 |
| SEZ6L | CAPN1 |
| ZDHHC8 | EIF3G |
| ASPRV1 | EIF5B |
| CSMD2 | FTSJ3 |
| FGD2 | ESYT1 |
| NECAP2 | KIF5C |
| PPRC1 | RAB32 |
| ZNF184 | KPNA3 |
| ACRV1 | ADRM1 |
| KATNAL2 | NUP50 |
| KCNF1 | USP33 |
| KIF16B | MUL1 |
| MAMDC2 | KLF4 |
| PDZRN3 | FLOT1 |
| PLEKHG1 | PDCD11 |
| SBNO1 | EIF4A1 |
| SLC46A3 | SERPINH1 |
| ARHGAP20 | LAP3 |
| CFAP43 | TPD52 |
| DPH7 | AARS1 |
| KIF12 | MIB1 |
| PLB1 | HM13 |
| POLN | VPS37A |
| RBAK | FLOT2 |
| SLC25A47 | NOP53 |
| ZNF136 | DAB2 |
| ZNF224 | IFI27 |
| ZNF473 | SMC1A |
| DNAH3 | RANBP1 |
| EFCAB6 | MLLT11 |
| HIPK4 | PI4KA |
| ZSCAN2 | PDHA1 |
| FAXC | TAGLN2 |
| LARP1B | GDI1 |
| PLEKHG4B | RNF31 |
| ZMAT3 | PPP1CB |
| BTBD16 | RAD51 |
| CCDC171 | IRS1 |
| FAM83C | DBN1 |
| HEPACAM2 | WDR83 |
| KIAA1755 | CCZ1 |
| ZNF419 | PRKACA |
| ZNF431 | IRF5 |
| IRGQ | CLCN3 |
| ITPRIPL1 | HUWE1 |
| NWD1 | CASR |
| SLC35G1 | CCL2 |
| TRIM34 | RPL5 |
| TSNAXIP1 | SLC25A1 |
| ZNF48 | ERLIN1 |
| TAS2R20 | HNRNPL |
| ZNF287 | OAT |
| RERGL | NRP1 |
| ZNF776 | FBL |
| BNIP5 | MANF |
| ZNF772 | RPL9 |
| ZNF595 | LEPR |
| ZNF534 | SNX7 |
| SMKR1 | RUFY4 |
| TUBB4B | SRPK1 |
| HOXB9 | TP53BP1 |
| DDIT3 | GLT8D1 |
| KDM4A | PDIA4 |
| KIF11 | MPP2 |
| HIC1 | EIF4E |
| PABPC1 | CYLD |
| PTN | ACTC1 |
| BGN | EMC1 |
| PRSS3 | IRAK1 |
| MYH10 | PRODH |
| RPLP0 | KIF23 |
| TIMP4 | RASSF1 |
| CPT1A | PEX13 |
| FER | DCAF13 |
| HMGCR | EIF3F |
| HNRNPH1 | EIF2A |
| PRPF8 | MPG |
| AKR1C1 | RASSF5 |
| CBS | RAB3GAP2 |
| HNRNPL | ETFA |
| SPARCL1 | NUFIP2 |
| IRX2 | ACTN1 |
| NECTIN4 | TAPBP |
| RPS3A | FAT1 |
| RPS4X | APOL1 |
| CCR9 | EXOC8 |
| UGDH | RRBP1 |
| PLD2 | FXR1 |
| MFAP3L | INHBA |
| PRKCD | TNFRSF11A |
| NLRP3 | BMP2 |
| SYNCRIP | AGPS |
| ITCH | RPL19 |
| SLC1A5 | HEATR1 |
| LCP1 | SFXN1 |
| CDC25C | WDR3 |
| GFAP | SREBF1 |
| GADD45A | IGF2BP2 |
| ACTG1 | ALDH7A1 |
| HSPH1 | UBE2I |
| MSI2 | TFG |
| LAPTM4B | HMGB2 |
| GUCY2C | STAM |
| PLA2G2A | TNFRSF1B |
| NTS | UNC5B |
| FTO | SHH |
| KDM5A | MKI67 |
| PAX8 | STX6 |
| TNFRSF12A | MTA2 |
| TCP1 | SAFB2 |
| SYNPO2 | SEC31A |
| CCT8 | IL23A |
| PTH1R | NUDT21 |
| UBE2I | TNFAIP8 |
| CARM1 | RPL28 |
| ROR1 | STYK1 |
| CNR1 | RAB17 |
| IL7 | LAMTOR5 |
| ULK1 | HPRT1 |
| USP9X | DHCR7 |
| ADGRE5 | ACP1 |
| PHLPP1 | REST |
| AKR1C3 | RPS26 |
| CCL3 | ERP44 |
| DCLK1 | PDHB |
| UPF1 | RPA3 |
| RPL6 | RPLP1 |
| IL6ST | SYNCRIP |
| CCND3 | CLTA |
| ABL1 | BCLAF1 |
| KPNB1 | GEMIN4 |
| LYPD5 | GSDMD |
| CCK | RPS13 |
| DHX9 | DDX21 |
| CCNG2 | ROS1 |
| AGT | SDHA |
| ZBTB16 | YARS1 |
| SLC25A11 | SLC25A11 |
| CSNK1A1 | SEC11A |
| NCOA2 | RPF2 |
| PTP4A2 | SPOP |
| HNRNPU | TRIM25 |
| YTHDF1 | ATXN2L |
| SS18 | POP1 |
| PSMD14 | CCAR1 |
| MYO1B | IMPA1 |
| DVL2 | VRK2 |
| DHFR | FAU |
| APPL1 | MRPS2 |
| ADAR | MTERF3 |
| RUVBL2 | KDR |
| HOXD9 | PLD1 |
| CXCR5 | CLDN1 |
| ANXA7 | MYOF |
| SLC25A5 | RPS10 |
| ERP29 | ALYREF |
| NTN1 | CALM1 |
| EIF4G1 | CLDN2 |
| HACE1 | LAMTOR4 |
| SREBF1 | PRKAR1A |
| ILF2 | RPL10A |
| ACP1 | KHSRP |
| DDX21 | DHX15 |
| CCNE2 | SRRM2 |
| TAGLN2 | THRAP3 |
| VIRMA | STX8 |
| NCOA1 | DYRK1B |
| SMURF1 | VPS28 |
| COL18A1 | MVB12A |
| TNNI2 | VPS37B |
| XBP1 | SCARB2 |
| DUSP1 | HSPH1 |
| UBE2N | HGH1 |
| BIN1 | APEX1 |
| RPS16 | AATF |
| RPL17 | PTPN1 |
| FOXP2 | CHERP |
| GNL3 | DHX37 |
| EPB41L3 | FGFR2 |
| EGFL7 | PSMD10 |
| BCL2L11 | RAB3D |
| NAMPT | DDX55 |
| ANGPTL2 | DUSP16 |
| RIPK1 | RAD23B |
| WEE1 | FKBP5 |
| STAT5B | NDUFS1 |
| CHD4 | ALDH18A1 |
| IRF1 | MBP |
| KIF2C | SLC25A10 |
| NSD2 | RPS8 |
| LGALS4 | PGRMC2 |
| STIM1 | CPT1A |
| FNDC3B | SOD2 |
| CALD1 | PSMD14 |
| TPM4 | PAQR3 |
| PHIP | TFAP2A |
| TM4SF1 | IL7R |
| PLXNB1 | MAGED2 |
| CLTC | RAD23A |
| ID3 | SSR4 |
| MAP3K1 | NEFL |
| CAPG | CD36 |
| HSPA1B | IPO7 |
| OGT | STK38 |
| FLOT1 | SGK1 |
| RPL7A | TRAPPC3 |
| FGF8 | HYOU1 |
| MBD2 | RALBP1 |
| YWHAB | HMGN2 |
| WNT4 | ALDH1A1 |
| IRAK1 | PNPLA2 |
| CD59 | RPL22 |
| DSG1 | TFCP2 |
| MAOA | BAG5 |
| FURIN | RFC2 |
| CCT3 | PA2G4 |
| CTCF | PEDS1 |
| HYOU1 | TUBB8 |
| SERPIND1 | RPL10 |
| MGLL | SMC4 |
| SPTAN1 | IGF2BP1 |
| EFEMP1 | PIGT |
| TACR1 | CSTF1 |
| NOTCH4 | VPS37C |
| PKD1 | DSP |
| ATP5F1B | PC |
| CHD1L | USP15 |
| FMNL2 | SPI1 |
| PLAT | XRN1 |
| SPON2 | NCBP2 |
| TSG101 | RPL29 |
| SCARB2 | AXIN1 |
| GSDMB | DPYSL2 |
| ECT2 | FEZ1 |
| PML | ITGAM |
| RPS27A | PER1 |
| SERPINA1 | BHLHE41 |
| RPL7 | XAF1 |
| ADCY1 | PPP1R9A |
| RABL3 | PPT1 |
| CHFR | ATP5PO |
| RPL15 | FLG |
| YBX3 | FBXO22 |
| BNIP3 | CNOT1 |
| RTRAF | GEMIN5 |
| SIRT6 | ILVBL |
| AMACR | AKT3 |
| RPN2 | GOSR1 |
| CDK9 | TPP1 |
| SH3BP1 | GPSM1 |
| RPL13A | PCYT1A |
| IGFBP1 | CCNA2 |
| PRKAA2 | SUGT1 |
| KLRK1 | CKM |
| E2F2 | DDX47 |
| PLEC | EIF6 |
| HOXA9 | GSTP1 |
| CASP10 | AHNAK |
| PRKN | ELF1 |
| PSMA7 | CHMP5 |
| BBC3 | TOR1A |
| RPL8 | CARS1 |
| ALDH2 | EDEM1 |
| XRCC3 | STC2 |
| AKR1C2 | SF3B1 |
| PEG10 | RBM25 |
| MMP25 | CDH1 |
| LAMP3 | NTRK1 |
| CCR4 | CAPN2 |
| KAT2B | SMARCB1 |
| RPL5 | EIF3C |
| FBXO22 | GATA4 |
| BLACAT1 | KDELR1 |
| ADCY2 | TET1 |
| UPK2 | GGCT |
| F11R | ATR |
| G6PD | SRSF1 |
| PSMA4 | USP11 |
| GPER1 | CASP6 |
| SMAD1 | TNFSF15 |
| GJB1 | ATP5PD |
| GDNF | SLC7A11 |
| RPL14 | STIP1 |
| UBAP2L | HERPUD1 |
| CUL4A | ATP6AP1 |
| VAV2 | RAB3GAP1 |
| COL1A2 | ITPR3 |
| RALB | HNRNPUL1 |
| RAB1A | NONO |
| DHX15 | CLPP |
| SELPLG | ATAD3B |
| GRK6 | ABHD5 |
| SEMA5A | NAA10 |
| RPL34 | SLC1A5 |
| MLLT11 | RPL34 |
| OLR1 | TBL2 |
| CXCL9 | ILF2 |
| ACACA | SRP54 |
| TRIM16 | LUZP1 |
| KHSRP | ADAR |
| CENPF | AGL |
| TF | NUMA1 |
| GATA2 | EEA1 |
| CAP1 | HNRNPH3 |
| MYL6 | PIAS4 |
| CD40LG | RPL12 |
| CYP3A4 | CHMP1A |
| PSEN2 | KIT |
| MMP20 | MON1A |
| KMT2C | RBM8A |
| GAB2 | RNF168 |
| ICAM2 | MTPAP |
| HAS3 | RPS25 |
| CCL25 | TGFBR2 |
| EIF2S1 | CALU |
| SDHC | RHOG |
| ERO1A | DNAJA2 |
| HNRNPF | RPS18 |
| TYRP1 | NCBP1 |
| HEY1 | USP19 |
| EPSTI1 | HCRT |
| TLR10 | MARCKS |
| TUBA1A | NOC4L |
| NCK1 | PRKCSH |
| DSG2 | PBK |
| PCLAF | MACROH2A1 |
| WASF2 | RABGAP1L |
| H2AX | FBLN5 |
| TAX1BP3 | MCM2 |
| PTPN1 | EZR |
| ST6GAL1 | HNRNPAB |
| LDHB | XAB2 |
| BUB1 | PEG3 |
| SETD7 | TRIO |
| DDX1 | CDK4 |
| KLK4 | CPD |
| GRB7 | LYN |
| EIF2AK3 | PPP1CC |
| NEDD4L | SOAT1 |
| GRPR | DDX20 |
| EIF4B | XRN2 |
| FOXF2 | EIF3D |
| FERMT2 | LTV1 |
| PTK6 | HCCS |
| PAX2 | CCDC88A |
| SMARCC1 | ATIC |
| TGIF2 | PDCD5 |
| KLK10 | HMGN5 |
| CCN3 | HSPA2 |
| TEAD4 | EIF2B3 |
| SQLE | POLR2B |
| RHOB | PCMT1 |
| ENAH | RAI14 |
| SLC16A4 | CERS2 |
| ALYREF | TUBG1 |
| SRSF3 | WDR26 |
| PHB2 | RACGAP1 |
| ERH | TPM4 |
| CDC25B | CBX3 |
| MYO6 | LMAN2 |
| THBD | EXOC4 |
| CXADR | MAP3K11 |
| ASS1 | PRMT1 |
| SET | ADNP |
| RPS7 | DNAJC13 |
| CEACAM7 | MLF2 |
| CAT | NAGLU |
| PIAS1 | ABCF2 |
| RRBP1 | SEC24D |
| STARD13 | TERF2 |
| DEK | PLS3 |
| LARP1 | GOLM1 |
| SKA1 | NOL9 |
| RPL31 | AKR1B10 |
| ALOX5 | MARCHF8 |
| AQP3 | FBXL4 |
| FUT8 | SCAMP3 |
| NOB1 | AKAP13 |
| RPS27 | AP3D1 |
| DUSP6 | PPFIBP1 |
| IKBKE | SURF4 |
| KCNH2 | SNX17 |
| CXCL11 | PLAU |
| EEF1B2 | CDC25B |
| TMSB10 | RAB2B |
| NMU | PLAA |
| VIP | RBM28 |
| SOX12 | GNB1 |
| TRPM8 | ACTL6A |
| MYH14 | COPG1 |
| SEMA3A | ATP1B3 |
| ELOC | CLPTM1 |
| POMC | KTN1 |
| WTAP | EMG1 |
| NODAL | YTHDC1 |
| GNB4 | CAMK2G |
| ORAI1 | ASIC1 |
| ITGA9 | CD24 |
| RPN1 | TUBB1 |
| RPL23 | RNASE1 |
| GRN | TOMM7 |
| MAP3K2 | TUBA3D |
| FGF19 | SRM |
| IL24 | STT3B |
| LIMS1 | KIDINS220 |
| DAXX | DLST |
| TCF7 | SHMT2 |
| EYA2 | PRDX4 |
| BCL2L2 | SEPTIN7 |
| BST2 | CLPTM1L |
| ATP1A1 | U2SURP |
| FKBP5 | SMARCA4 |
| NFATC1 | PFAS |
| TFAP4 | RPL36 |
| HPRT1 | HNRNPA0 |
| HYAL1 | PHLPP2 |
| CD4 | SNX27 |
| TUBA1C | RARA |
| TRAF4 | TOM1L2 |
| PCBP2 | PSME2 |
| KRT16 | TBC1D2B |
| RPS2 | DCTPP1 |
| TLR1 | FSCN1 |
| FZD9 | AFG3L2 |
| WNT9B | SPNS1 |
| F2 | NSDHL |
| CSNK1E | CAVIN1 |
| CD70 | CERKL |
| AKAP13 | EIF3M |
| TLL2 | WDR18 |
| CLIC6 | BUD23 |
| SOX18 | C1orf35 |
| EIF3A | RBM39 |
| RPS15A | TPR |
| PRDX4 | FKRP |
| DBN1 | TBC1D10B |
| TP53INP1 | NSFL1C |
| GAB1 | MID2 |
| MAPK9 | ERFE |
| MCM4 | CDC14A |
| FSTL1 | TRAPPC2 |
| RALBP1 | RBM14 |
| ADAMTSL1 | PLEC |
| PKN1 | LUC7L2 |
| TNFRSF14 | AQP3 |
| IRF5 | MCCC1 |
| CCN6 | SUCLG2 |
| TAB1 | POMGNT2 |
| GLS2 | UCP2 |
| PRKCB | PSMD6 |
| FGF9 | RBBP7 |
| NID1 | AP2A2 |
| RPS9 | NCSTN |
| SGK1 | ADAM9 |
| AZGP1 | NSMAF |
| IMPDH2 | GNAS |
| CCT6A | ITCH |
| FAM120A | RANBP2 |
| BMPR2 | EIF3B |
| S100A10 | MED4 |
| SNCA | WHAMM |
| CXCL3 | SRPRB |
| TNFAIP8L2 | ITGAL |
| EPS8 | TNFRSF10A |
| SSTR5 | TNFRSF21 |
| PLEK | IL13RA1 |
| GGT1 | TNFRSF10D |
| USP14 | HTATIP2 |
| ANXA4 | RAB31 |
| PFN2 | VPS37D |
| CBX4 | USP8 |
| EIF5A | SEC61B |
| PAWR | SAR1A |
| YTHDF3 | STOML2 |
| MYO5A | MDH2 |
| PEBP4 | RECQL |
| MATR3 | P3H1 |
| KDM6A | PGR |
| LOXL4 | PLA2G4A |
| FABP4 | TLR7 |
| USP1 | PEBP1 |
| PAK2 | PELO |
| SEPTIN9 | CC2D1A |
| PPP1CA | MDC1 |
| DDB1 | DDX23 |
| TUBB4A | CAPZB |
| FMR1 | TRIM7 |
| PSME3 | SCN5A |
| LDLR | BCAR1 |
| TRPV6 | CD63 |
| GNRHR | SDC2 |
| PPARD | CUL2 |
| ARRB2 | ACSL3 |
| TNFRSF1B | TCOF1 |
| RAB22A | SLC38A2 |
| KMT5A | ARPC4 |
| KIF20A | UBA3 |
| WNT6 | WDR74 |
| TAP1 | FOXE3 |
| S1PR1 | NDUFV1 |
| CCT4 | TOR1AIP1 |
| CCT5 | GLI1 |
| CD8A | DNAJC10 |
| CAMK2G | ULK4 |
| PLD1 | TRAPPC6B |
| SRXN1 | MTCL1 |
| NAT1 | BDNF |
| PLCE1 | EPS15 |
| RBL2 | ABCB1 |
| SEMA3E | KLF5 |
| PREX1 | LRG1 |
| RPS23 | TBC1D2 |
| HOXA1 | PPP3CA |
| JAM3 | FANCC |
| AGTR1 | CTPS1 |
| BAD | PGRMC1 |
| BTG1 | IQGAP1 |
| UBD | SLC25A22 |
| CAMP | ATAD3A |
| PTPRA | PDIA2 |
| MLXIPL | CARM1 |
| HNRNPAB | FBXL3 |
| RPS25 | ALK |
| PRLR | SEC24A |
| TSPAN7 | CDK2 |
| USP2 | ARF4 |
| CD109 | CALCOCO1 |
| FOSB | TNFAIP8L2 |
| NR2C2 | HSPA6 |
| RAB37 | SLC25A4 |
| CDK7 | ARF1 |
| TXNRD1 | HSPE1 |
| LGI1 | DRG1 |
| TRIM44 | PFKL |
| WNT8B | AMFR |
| GNG5 | PEX3 |
| GNG13 | POLR2C |
| MCM5 | IVNS1ABP |
| PABPC4 | OTUB1 |
| ARID4A | PSMD1 |
| PDHA1 | CSRP2 |
| TFF2 | MESD |
| MZF1 | UNC45A |
| VASH1 | NUDCD3 |
| KLF2 | LANCL2 |
| RPL28 | CAMK2A |
| FCGR3A | KDM3B |
| HDAC8 | LATS2 |
| AQP5 | PHLDA2 |
| CSNK1D | LYZ |
| FOXK1 | CYB5R3 |
| NOG | TMIGD2 |
| RPL13 | PIP5K1C |
| RPS11 | ARL1 |
| PLCB4 | TARS1 |
| TUFM | CYFIP1 |
| PLAC1 | NCAPD2 |
| ITGB6 | DACT1 |
| MYO1C | TRMT10C |
| VASP | SACM1L |
| NPY | CDK16 |
| HLTF | VPS4B |
| RCAN1 | DDX39B |
| PARVA | CS |
| HUNK | VAMP3 |
| GPX2 | TMX1 |
| CACYBP | IL12B |
| CCT2 | BCR |
| RPS8 | CBL |
| TIGIT | TGFB2 |
| MIA | ERCC2 |
| ACTL6A | BUB3 |
| IVNS1ABP | MTM1 |
| PON1 | USP24 |
| NR1H4 | OXSR1 |
| RPL11 | NSUN4 |
| SLC25A3 | TRIR |
| RPL10 | MOGS |
| G3BP2 | DNAJC9 |
| ABI1 | ACADM |
| ADAM8 | PCK2 |
| RPL3 | ZNF787 |
| H4C1 | RPS6KA1 |
| IRF7 | ECSIT |
| EIF5B | EMC6 |
| CTRC | TLN1 |
| MAPKAPK2 | CEP170 |
| SP3 | AMOT |
| SRD5A1 | RPL31 |
| WNT3 | APEH |
| PIK3R5 | SMC2 |
| WNT10A | SMARCC2 |
| ADCY9 | EIF2B1 |
| FZD10 | LDLR |
| MAPK6 | CDC42 |
| MLC1 | STOM |
| GNG7 | SLC1A3 |
| GNG8 | ABCA1 |
| PXDN | TTK |
| ACTR3 | SLC27A4 |
| IL4R | MGST1 |
| TECR | VANGL1 |
| CDC37 | KLHL9 |
| MCRS1 | SENP3 |
| EGLN3 | H2AZ2 |
| PSMD1 | NLE1 |
| HNRNPUL1 | WDR43 |
| NISCH | RHOA |
| GPX1 | PDGFA |
| TRPS1 | COPS5 |
| PIK3C3 | TNNI3 |
| SUMO1 | USP35 |
| KLK11 | DNAJB11 |
| STAU1 | SLTM |
| SIK2 | ADRB2 |
| IL22 | CAMK2D |
| NET1 | FLII |
| APLN | DNAJC3 |
| KDM4C | BAP1 |
| ZFYVE9 | HERC5 |
| PA2G4 | PHF5A |
| MAP3K8 | TTC5 |
| SDC2 | KDM2B |
| BUB3 | HSPBP1 |
| MYOF | HK1 |
| RNH1 | MLH1 |
| GJB6 | PGM1 |
| SAA1 | XDH |
| HIPK2 | ADSL |
| DAB2 | DSG1 |
| BAIAP2 | H2BC21 |
| LAMA1 | HBS1L |
| PRPF19 | WDR36 |
| SEC11A | WDR12 |
| TK1 | UBA5 |
| CRAT | SYK |
| INPP4B | CHAF1A |
| POU2F1 | NGF |
| IL23A | ALCAM |
| FOXD3 | HIPK3 |
| MELK | CHD6 |
| B4GALNT1 | ABLIM1 |
| ALOX15 | SEC13 |
| XPO5 | SMARCA5 |
| P4HA2 | PCNP |
| CUL4B | PRDX6 |
| PSMC1 | CD46 |
| NR4A2 | FYN |
| ADGRG1 | GFER |
| EPO | CD82 |
| NTF3 | KRT19 |
| RPL29 | MDH1 |
| RBPJ | CUL5 |
| ATG7 | MRPL3 |
| NCOR2 | AGR2 |
| AGK | ASCC3 |
| FUBP1 | BMS1 |
| RPL18 | MISP |
| BCL3 | PIK3R3 |
| MMP19 | CLN6 |
| PPM1D | AAAS |
| CAV2 | OGDH |
| SPTBN1 | DKC1 |
| ATOH8 | HCFC1 |
| LZTS1 | TRRAP |
| IPO5 | PARN |
| FLT3 | AIMP2 |
| LY6D | MRPS23 |
| GLG1 | RPL37 |
| PGAM1 | SPCS2 |
| SPAG5 | UGDH |
| B3GNT6 | IFIH1 |
| SMARCE1 | USP32 |
| USP4 | RAB29 |
| PTK7 | UBE2L6 |
| FGF13 | PPP2R2B |
| SPRY2 | HNRNPDL |
| OTUB1 | RNF115 |
| SEMA4D | TPT1 |
| ACE2 | RIF1 |
| MICB | RRP1B |
| RARG | ABCF1 |
| TARBP2 | RPS27L |
| TAC1 | SORBS3 |
| PLPP5 | PRRC2B |
| PRNP | LIMA1 |
| NR5A2 | DERL1 |
| DIABLO | RUSC1 |
| RTCB | NF1 |
| ARHGEF7 | CSTA |
| TRIP13 | HARS1 |
| PAQR3 | ATP6V0A1 |
| ITGAM | HAVCR1 |
| ZBTB7A | NAA15 |
| HOXA13 | VPS13B |
| BACE2 | ST13 |
| RPS14 | CAB39 |
| RPL12 | URB2 |
| TSHR | YLPM1 |
| FOSL2 | EFNB2 |
| GHR | BMP6 |
| CBX8 | RAB27B |
| MECP2 | SIVA1 |
| CA2 | RAB40C |
| SOX30 | RAB40A |
| ACKR2 | YME1L1 |
| DNAJB4 | PTPN6 |
| OCLN | NACC1 |
| CBX3 | TBC1D4 |
| BRD2 | RUSC2 |
| RPL23A | H2BC15 |
| RAB10 | ABL2 |
| HDAC5 | MADD |
| HRNR | MARK2 |
| CRKL | TIMD4 |
| CSNK2A2 | LIX1 |
| LAMB3 | CTNND1 |
| EIF3B | FEN1 |
| ELOVL5 | TGFBI |
| TRIP10 | SPHK2 |
| BCL6 | CHAF1B |
| NR1I2 | TRIM14 |
| SPG7 | VPS26B |
| USP13 | EPS15L1 |
| NUMA1 | DYSF |
| AGR3 | TBC1D9 |
| DDX39A | SEH1L |
| F7 | DYNLT1 |
| RPS6KB2 | AP4B1 |
| EIF2AK2 | PRKCE |
| TFAP2C | SPINK1 |
| KARS1 | MUC1 |
| SPINT1 | SOX2 |
| SFRP2 | MARS2 |
| RPS18 | NUP188 |
| KIF18A | TMEM30A |
| MNAT1 | AQR |
| ASTN2 | BANP |
| CASP7 | USO1 |
| ACO2 | TSR2 |
| CDCA8 | RPL26L1 |
| REG4 | CNOT4 |
| ITIH2 | PRKCZ |
| MAP4K4 | ECHS1 |
| ICAM3 | SPTBN1 |
| CPSF6 | CDC34 |
| CDK8 | SARS1 |
| CYP1B1 | PREP |
| COL12A1 | SRP72 |
| ADCY5 | PKP3 |
| ADCY3 | MRPL38 |
| ADCY6 | PTOV1 |
| PRKAR1B | HDHD5 |
| PIK3R4 | H2AC14 |
| GNB5 | ITSN1 |
| LEFTY2 | MCM3 |
| SOS2 | FAM120A |
| GRK1 | PRKD1 |
| IFNGR2 | CTSZ |
| ADCY7 | NOX4 |
| ADCY4 | LGALS3BP |
| GNG2 | E2F4 |
| GRK4 | GSTM3 |
| WNT16 | RBCK1 |
| GRK7 | CLEC4A |
| GNG3 | SRP14 |
| GNGT2 | GLB1 |
| GNG11 | SLC2A3 |
| GNG10 | NR1H2 |
| STK4 | GPC4 |
| TP53BP1 | BRSK2 |
| MDC1 | SMCHD1 |
| AMBP | S100A7 |
| GIT1 | GPX8 |
| SRGN | CPVL |
| RPL19 | LANCL1 |
| GFRA1 | ZG16B |
| MPDZ | SEC61A2 |
| PSMA3 | PIGS |
| SLC25A6 | MMP9 |
| MPP1 | PLOD3 |
| MTAP | GGPS1 |
| BAK1 | ZFP36 |
| FGF5 | TM9SF2 |
| GPC1 | BORCS6 |
| E2F5 | ERMP1 |
| TTC9 | SLC33A1 |
| PDIA4 | FGFR1 |
| PRSS2 | ARHGDIA |
| IL2RA | MAP4K4 |
| TGFB1I1 | FAP |
| LCK | HMGA2 |
| RPL27 | ANXA6 |
| SAFB | GPS1 |
| STIP1 | MRTO4 |
| EIF4A3 | ZFAND1 |
| RAP1B | FGF1 |
| PTX3 | SERPINB2 |
| RIOX2 | SLC38A9 |
| CAD | CREB1 |
| PC | LRRFIP2 |
| RTN4 | SNRPA |
| CCT7 | TSPAN1 |
| IPO7 | PURA |
| DPYSL3 | TBCK |
| IPO4 | KCTD7 |
| KIF1B | ANKHD1 |
| NUTM2B | JUNB |
| NOP2 | MPDU1 |
| EIF1AX | PNP |
| LPXN | RALA |
| CBLB | ATP6V0A2 |
| IL1RL1 | AP1S3 |
| PDLIM5 | SBSN |
| RASA1 | APOA1 |
| TYRO3 | CD209 |
| MTUS1 | RHOB |
| SNRPA1 | GPC1 |
| PSMD2 | VARS1 |
| GLRX3 | ALDH9A1 |
| RPS20 | NUDC |
| RPL24 | EIF1AX |
| CLEC2D | PKMYT1 |
| SRSF2 | WBP2 |
| RNASET2 | ZFR |
| TOLLIP | FAM98B |
| ANXA10 | EBNA1BP2 |
| STK38 | FAM98A |
| SLC39A6 | TMEM160 |
| GLS | NOS3 |
| APOC1 | PRKCB |
| PDIA6 | SNAI1 |
| RPS5 | MCCC2 |
| UBA52 | RING1 |
| AKR1B10 | IST1 |
| EFNA4 | DDA1 |
| ELF3 | TMEM164 |
| MAP3K5 | PSMB2 |
| GCNT1 | TRA2B |
| SMARCC2 | UFSP2 |
| PSMD5 | NUP210 |
| REST | CCDC86 |
| PIAS4 | CXCL12 |
| RPL38 | RAB11FIP1 |
| NCAPG | DCAF17 |
| ACKR4 | AGFG1 |
| PER2 | STX4 |
| WASL | RPS12 |
| PIWIL2 | DDX10 |
| CREB5 | CEBPZ |
| FPR2 | RALY |
| DNAJA1 | TM9SF4 |
| EEF1E1 | SARNP |
| HNRNPA3 | CCDC12 |
| CBX5 | UTP3 |
| SEC62 | AGT |
| GAL | WNT3A |
| JUND | SUCLA2 |
| SLC22A3 | GSTO1 |
| GCN1 | PLOD2 |
| NPEPPS | TNIK |
| KRT2 | NR2C2 |
| BCAP31 | NUP133 |
| GMNN | S100A11 |
| KRT75 | STXBP3 |
| HOXA11 | U2AF2 |
| TFCP2 | STK25 |
| OVOL2 | NLRC5 |
| TMEM8B | CRNKL1 |
| HNRNPR | ANP32E |
| UBE3C | TRMT112 |
| KMT2A | BACE1 |
| NTSR1 | SMPD1 |
| TBL1XR1 | AIMP1 |
| CYP3A5 | MEF2D |
| CD200 | SDHD |
| ELK3 | RPL35 |
| FOXK2 | S100A10 |
| ID4 | MACF1 |
| CEBPA | RPL35A |
| TFEB | CCN1 |
| GLUD1 | MRTFA |
| LAMTOR5 | MVP |
| TBX21 | ATPAF1 |
| PLK4 | RTRAF |
| ADIPOR1 | LAPTM4B |
| LUM | LARP4 |
| BHLHE41 | NGDN |
| CALU | PGGT1B |
| RCC2 | KLHDC10 |
| RPS6KA1 | NRBP2 |
| EHF | M6PR |
| FBP1 | KRT2 |
| RIPK4 | IRF8 |
| SSB | COL6A1 |
| ENTPD1 | IRF7 |
| FXR1 | MAX |
| HMGB3 | MYCN |
| NAT10 | IL1A |
| CLEC1B | VTN |
| RALY | ARHGAP4 |
| NFKB2 | DUSP4 |
| ASAH1 | ZFP91 |
| PRSS8 | SPOUT1 |
| DOT1L | CALM2 |
| ASPN | POLR1A |
| CAPRIN1 | TAF6 |
| TARDBP | RP9 |
| ARPC2 | FKBP15 |
| DRG1 | PNPO |
| MYBL2 | KDM2A |
| EIF3M | TRAPPC2L |
| VAV1 | H4C1 |
| AIM2 | UBL4A |
| BAMBI | RCC2 |
| TP53BP2 | GAK |
| NUCB2 | AKR1C3 |
| NDUFA13 | PRKCA |
| HSD17B12 | PRCP |
| HAX1 | PVR |
| IKBKG | POFUT1 |
| GLO1 | RCC1 |
| PDCD6IP | SLC39A14 |
| ALDOC | NPEPPS |
| IQGAP3 | USF1 |
| PKP3 | GIPC1 |
| RPLP2 | PPAT |
| TUFT1 | TIMM44 |
| CYRIB | KXD1 |
| GHRL | UGGT1 |
| ADAM28 | SNCAIP |
| NAP1L1 | SNX1 |
| CCN5 | MON1B |
| MAP3K14 | CRYAB |
| TUBB2B | GTF2I |
| RCOR1 | RPS15 |
| LRRC59 | BMP2K |
| IL13 | SAP18 |
| POU1F1 | MECP2 |
| CTNNBIP1 | ENG |
| RPL22 | CCN2 |
| MCPH1 | RELB |
| EIF2S3 | MID1 |
| COPA | HDLBP |
| RPL21 | PIEZO1 |
| SUFU | RASAL2 |
| UCHL3 | BLZF1 |
| RBM14 | SPATS2L |
| U2SURP | WASHC2A |
| DNM1L | RRAS2 |
| DIAPH1 | WRN |
| VANGL1 | MCM6 |
| HOXA5 | USP28 |
| PCMT1 | DNAJB12 |
| CXCL6 | CORO7 |
| PTBP3 | SPECC1 |
| IL12B | UBXN1 |
| TTR | PTGES3 |
| TYK2 | CPOX |
| ESRP1 | PPP4C |
| TBP | SRI |
| BRD3 | KISS1 |
| FOXP1 | KLRK1 |
| CCNB2 | YEATS4 |
| NEK8 | LRBA |
| TMEM71 | RPL26 |
| INPPL1 | SEC63 |
| NEU1 | RPL27A |
| DSG3 | AUP1 |
| E2F7 | MTX1 |
| HSPG2 | RPL36A |
| C3 | COPS8 |
| MFGE8 | SART1 |
| EPHB3 | HEXIM1 |
| VDAC2 | NOTCH2 |
| HADHA | PLN |
| LAMA3 | FSTL1 |
| TCF21 | HYPK |
| MIIP | PIP4K2B |
| PTPRN2 | PDE3A |
| ACTA1 | TAP1 |
| ERAP1 | MAPKAPK3 |
| SH3PXD2A | SIN3A |
| GATA1 | GALNT2 |
| IL5 | LATS1 |
| PKP1 | NRF1 |
| CTH | PSMB1 |
| DAG1 | ANP32A |
| OLA1 | GHRL |
| SHOX2 | DCAF1 |
| LTBP1 | PSME1 |
| CGAS | UBAP2L |
| ISG15 | RDH13 |
| PGRMC1 | ZWINT |
| PLS3 | MRPL49 |
| BCL9 | DDX27 |
| ZNF703 | TIPRL |
| PSMD4 | NFKB2 |
| CSDE1 | ACTA1 |
| RAB1B | RBM10 |
| WDR77 | RBBP6 |
| MYBBP1A | G3BP2 |
| CPSF7 | SRP9 |
| YWHAH | COL3A1 |
| RNF111 | KMT2A |
| MAL | RORB |
| MAP1B | SFN |
| LYAR | IL12RB2 |
| FEN1 | IL21 |
| PPP1R12A | STK24 |
| HOXA10 | MLX |
| SYVN1 | TRAF1 |
| FKBP4 | CTHRC1 |
| PYCARD | IL15RA |
| CYP2A6 | ZC3HC1 |
| THRA | ITGB1BP1 |
| PAPPA | RFC1 |
| XRCC2 | SYVN1 |
| BCAT1 | TBL3 |
| BLZF1 | CMSS1 |
| SNRPD1 | CCDC50 |
| RBMX | SF1 |
| RPLP1 | ATP6V0E1 |
| RETN | EBP |
| QSOX1 | BLOC1S1 |
| HOXC6 | PFKM |
| ATAD3A | PAX5 |
| USP3 | SLC22A5 |
| NPTX1 | UBE2B |
| SULT2B1 | LYST |
| DOCK1 | NUCKS1 |
| SRPK1 | SH3GLB2 |
| CUL5 | TBC1D9B |
| STRAP | TRPC6 |
| SORT1 | FGF7 |
| NBEAL1 | PFKFB4 |
| BID | MUC5AC |
| TMEM97 | RILP |
| TUBB2A | MAP2K7 |
| PUF60 | PABPN1 |
| B3GAT1 | CPSF3 |
| EPHA4 | LMO7 |
| KCNMA1 | BTF3 |
| COL5A1 | ASF1A |
| TINCR | TTI1 |
| RACGAP1 | MRPL22 |
| HPSE2 | CAAP1 |
| ABCA1 | G6PD |
| CD99 | PIAS3 |
| ERLIN2 | CLTCL1 |
| GGCT | ADI1 |
| ARPC4 | NUCB2 |
| RARA | CTU2 |
| KAT2A | GLTP |
| NR1H2 | DDX46 |
| ALKBH1 | PPP6R3 |
| PIGR | BORCS5 |
| COPB1 | PRKD2 |
| ASNS | EIF4G3 |
| KIF22 | TPCN1 |
| FOXF1 | GAB1 |
| KIF14 | CUX1 |
| SEMA4C | TAB1 |
| KNG1 | SNAPIN |
| DHCR7 | ZFYVE16 |
| ERN1 | MOB4 |
| CYP2B6 | TRA2A |
| FDPS | PLCG1 |
| IL17RD | ATP1B1 |
| RPTOR | UQCRFS1 |
| CTNND2 | MAP2 |
| LAP3 | UBE2T |
| EYA4 | PLSCR1 |
| MTHFD2 | SNW1 |
| AKIP1 | SGTA |
| TPO | NCLN |
| SOD3 | UTP18 |
| USP15 | AP4E1 |
| TNS4 | MPRIP |
| PPM1B | ZCCHC17 |
| SENP2 | MAP3K1 |
| UBR5 | UROD |
| COPS3 | XPO5 |
| ATG5 | EEF1E1 |
| CD58 | LSM2 |
| RIPK2 | RPS21 |
| MEF2D | PTPN12 |
| FERMT3 | ASNS |
| MYO10 | ABCB7 |
| DIRAS3 | LTA4H |
| FUT2 | RCAN1 |
| PLXNC1 | KRT9 |
| HOXC10 | PRPF31 |
| PRDX5 | GSPT1 |
| RSF1 | RBP1 |
| GALNT6 | STIM2 |
| LPAR3 | WWP1 |
| NDC80 | BCCIP |
| EFS | IPMK |
| YES1 | BZW1 |
| SOCS5 | TRMT61B |
| FBXL14 | SF3B3 |
| WAS | SNRPB2 |
| PURA | HP1BP3 |
| CYLD | ATP7A |
| MX1 | LNPEP |
| TAP2 | GAN |
| REPS2 | RPL30 |
| OR51E2 | NGFR |
| PRPS1 | LRP6 |
| ATP5PO | SLC2A4 |
| SLC25A13 | CCL5 |
| PFKP | TREM1 |
| CIB1 | TTF2 |
| CCR3 | ERAL1 |
| RAPGEF3 | CEP131 |
| FAM163A | OSGIN1 |
| POMGNT2 | NUP214 |
| NKG7 | VAMP2 |
| SBSN | NRDC |
| RUFY3 | RPL24 |
| VAMP8 | PPAN |
| ARHGAP5 | CFAP20 |
| PSMC3 | MRPL4 |
| PLXNB3 | FCF1 |
| IPO9 | GUSB |
| FAT1 | MAGED1 |
| UBE2D1 | MELK |
| STEAP1 | FOXP1 |
| IGFBP4 | WASF1 |
| NSUN2 | NIPBL |
| ARHGAP35 | RPIA |
| SLC25A1 | CLN5 |
| TFAM | DHX16 |
| KLF7 | EPB41L2 |
| BCAR3 | GLIPR2 |
| PARD6A | TBC1D10A |
| CCNL2 | HES1 |
| MICAL2 | EXOC2 |
| UGT1A1 | ARF3 |
| FLNC | ERGIC3 |
| RPS24 | TRAPPC13 |
| IL17RB | YOD1 |
| SRSF6 | CCND3 |
| ATP6V1A | ARRB1 |
| PLA2G4A | VTCN1 |
| CLDN2 | FAM131B |
| AFAP1L2 | FBXO21 |
| CD247 | CYP2E1 |
| PTPN13 | KARS1 |
| COPB2 | NDUFS7 |
| RPL10A | PLOD1 |
| CCBE1 | ARPC2 |
| CP | PUF60 |
| CYP2E1 | DHX36 |
| CEP70 | PRPF4 |
| MECOM | SPECC1L |
| CD28 | SHC1 |
| HOXB2 | MCAM |
| CLDN6 | ALG1 |
| PSPC1 | BLMH |
| STAT4 | BAG6 |
| LETM1 | ANKZF1 |
| MORC2 | SNX6 |
| TSPAN1 | AP4M1 |
| KIF26B | APBB1 |
| ARAF | APC |
| VDAC3 | KAT2A |
| ECPAS | ATP7B |
| H3C13 | PTPN13 |
| ANP32A | LZTR1 |
| SHMT2 | NHP2 |
| PSMC2 | STRN |
| F10 | UFC1 |
| PRDX3 | ATP13A1 |
| PDGFC | MDN1 |
| GIPC1 | CSTF3 |
| IHH | PLK3 |
| ZBTB33 | MYLK |
| ARF1 | POLR1C |
| COL4A3 | IFITM1 |
| PIEZO1 | SUMF2 |
| FMNL3 | FIZ1 |
| EIF6 | SYT1 |
| MYH11 | NR1H3 |
| RPA1 | HPSE |
| TPM2 | CYB5A |
| PLOD3 | MAP3K14 |
| RPS13 | GRP |
| EBF3 | PHLPP1 |
| SRSF7 | PKP1 |
| TMOD3 | KPNA6 |
| ERCC6L | PMEPA1 |
| TEAD1 | ZC3H15 |
| BTK | RBM34 |
| ERCC5 | ATF3 |
| APOBEC3B | SLC1A4 |
| HOXC8 | HCRTR1 |
| ARF3 | CLDN5 |
| PIK3AP1 | C1QTNF9 |
| LAG3 | ARAF |
| PIAS2 | CDK9 |
| SNRPA | EIF2B2 |
| SCGB2A1 | MED17 |
| MEIS1 | GATAD2A |
| CSPG4 | MAP7 |
| COL11A1 | RAB11FIP5 |
| BCKDK | EXOSC1 |
| DARS1 | PDCD6 |
| GSC | ESYT2 |
| RPL9 | VPS13C |
| BCL9L | IKBIP |
| RASSF8 | LSG1 |
| RNF126 | PCID2 |
| TMEM238L | EPPK1 |
| SAT1 | HSBP1 |
| RPS10 | IMP4 |
| OBSCN | CCZ1B |
| ADAM23 | BRI3BP |
| CDC5L | SESN1 |
| CBR3 | ABHD10 |
| TRIM65 | ERCC6 |
| BMP3 | MPP1 |
| OXER1 | FAM111A |
| HES6 | F3 |
| IL13RA1 | WDR48 |
| IFITM1 | TWF1 |
| BCL2A1 | LSM6 |
| IMMT | TDRD3 |
| GTPBP4 | IMP3 |
| THRAP3 | NUDT16L1 |
| LHPP | PSAT1 |
| FBLN1 | SLAMF1 |
| PINX1 | COL8A2 |
| PCSK9 | SRMS |
| ELK1 | DDIT4L |
| RAC2 | GPRASP1 |
| TUSC3 | TINCR |
| CHRM3 | DSC3 |
| IFNAR1 | MCM4 |
| PHF8 | ALDH3A2 |
| CDK10 | DOCK2 |
| GART | KRIT1 |
| FBXO11 | MLEC |
| SNRNP200 | MED10 |
| DHX30 | MED6 |
| SNRPD2 | MED7 |
| ME1 | RPL39 |
| TSGA10 | MED8 |
| PSIP1 | POLR1F |
| PMEPA1 | SDAD1 |
| BTLA | GOT2 |
| MACROD2 | APRT |
| GSR | MMAB |
| HNF1A | NEK7 |
| HDLBP | ARPC1A |
| H3C1 | TRMT1L |
| DACH1 | OCLN |
| EIF3F | ECM1 |
| ANLN | PEG10 |
| ITGB8 | TIMM50 |
| PARP2 | ARHGEF2 |
| RRM2B | NISCH |
| SASH1 | PNKD |
| IL2RB | POLD2 |
| TEP1 | NOP2 |
| CDKN2C | WTAP |
| TTN | RBM26 |
| HOXB8 | PRF1 |
| JPT1 | SMN1 |
| LTB4R2 | TPM3 |
| SULF1 | PEX14 |
| PFKFB4 | P4HA1 |
| UBE2D3 | COPE |
| METAP2 | AKAP8L |
| GCNT2 | WT1 |
| RPL35A | NPR1 |
| CYFIP1 | PADI4 |
| BAG5 | SNAI2 |
| TAB3 | COPS3 |
| SH3BGRL | CAPZA1 |
| FBXO45 | CLDN6 |
| NOX1 | SOCS5 |
| SMARCA5 | PHLDA1 |
| TNFSF9 | IDH1 |
| EPHA7 | NACA |
| ANGPTL1 | DEF8 |
| PTGES | TMED9 |
| RPRD1B | LDB3 |
| CYP2D6 | PLS1 |
| GLIPR1 | KRT83 |
| RNF8 | EIF1AY |
| DNAJA3 | ALB |
| OTUD7B | SRPK2 |
| ARPC1A | METAP2 |
| CASC3 | MYL9 |
| FLII | CLIC1 |
| TM4SF5 | TRIP12 |
| KLF12 | TAF2 |
| RBM25 | UFM1 |
| TLE5 | DBNL |
| SLTM | SF3A1 |
| SMC1A | SF3A2 |
| AP2B1 | AKAP11 |
| FUT7 | RTF2 |
| CPNE3 | PRDM1 |
| PSMD12 | HSPA13 |
| ARHGAP18 | IL2RB |
| BATF2 | ITGA2B |
| FGA | EPHA4 |
| MEIS2 | FZD4 |
| RGS5 | ITGA4 |
| IL37 | LRP5 |
| ZFP36 | PLAT |
| SCARB1 | ITGB6 |
| TLN2 | EPHB1 |
| YTHDC1 | IL4R |
| BMP1 | CSF3R |
| SEMA3C | FZD2 |
| LRG1 | ITGAX |
| IL10RA | TYMP |
| DGCR8 | CCR2 |
| GFI1 | COX4I1 |
| EVI5 | FZD1 |
| MPRIP | FZD5 |
| RPL27A | IGFBP7 |
| STX2 | IL12RB1 |
| SOX7 | IL5RA |
| SIAH1 | ITGA1 |
| MAPK12 | ITGA7 |
| LIMK2 | SEMA3A |
| DIAPH3 | SEMA4D |
| QKI | SMAD9 |
| DEPTOR | WNT10B |
| PFKM | CCR1 |
| ETFA | CALCA |
| TMPO | DKK1 |
| RAB23 | FZD9 |
| COPG2 | IL11RA |
| KCNH1 | IL3RA |
| ECRG4 | ITGA8 |
| TNFAIP3 | ITGA9 |
| MUCL1 | ITGB5 |
| ARMC3 | ITGB7 |
| PSEN1 | BMP3 |
| ARG2 | CASP5 |
| PINK1 | FZD10 |
| COL8A1 | GZMA |
| EGLN1 | IL21R |
| TES | TNFRSF25 |
| DUSP10 | BMP5 |
| MDH2 | CCL3 |
| TAB2 | CIB1 |
| IARS1 | EPHB6 |
| PRPF6 | NOL3 |
| PIR | SLC39A4 |
| PKLR | TRAF5 |
| ACVR1C | RAB3A |
| PTMA | SMPD2 |
| NSDHL | CHRD |
| TXNDC5 | EPHA8 |
| BTC | IL27RA |
| GAP43 | ITGA11 |
| EXO1 | ITGAE |
| LMTK2 | ITGB8 |
| PLAAT3 | EPHA6 |
| SIX4 | NPAS2 |
| DKC1 | TNFRSF10C |
| GANAB | ITGAD |
| FBL | ITGB3BP |
| USP5 | MNDA |
| SNIP1 | RAB28 |
| RBFOX2 | GIMAP5 |
| EIF2S2 | CXCL14 |
| DCAF1 | EDIL3 |
| SKA3 | ITGA10 |
| APP | MXD1 |
| MCM6 | NDRG4 |
| EPB41L5 | EMB |
| NR3C1 | IL9R |
| IL4I1 | NDRG3 |
| ST6GALNAC3 | SLC39A3 |
| ST6GALNAC5 | IL20RB |
| HBB | MVB12B |
| OSMR | RAB40B |
| CPQ | ATRAID |
| LLGL2 | RAB3B |
| CIAPIN1 | PHLDA3 |
| EMD | SLC39A2 |
| MCU | RAB22A |
| FBXO8 | RAB3C |
| SEMA3B | RAB4B |
| HTT | RAB20 |
| IPO8 | RAB6C |
| CYB5R3 | ALKBH7 |
| CNDP2 | PIK3R6 |
| TRIM59 | ESD |
| TGM4 | RARRES1 |
| PPP1R13L | RNF135 |
| NECTIN2 | UBE2M |
| BDKRB2 | ANGPTL8 |
| C1QA | RAD50 |
| GPC5 | NANS |
| SRCIN1 | DNAJB6 |
| CKAP4 | HAT1 |
| GARS1 | TMOD3 |
| CNBP | RBM15 |
| AHSA1 | OCIAD2 |
| SLC25A22 | NIFK |
| CKAP2L | ELAVL4 |
| EIF4G2 | ECE1 |
| CARD10 | ARHGAP1 |
| OTUD4 | GOSR2 |
| RAB31 | PEX6 |
| GPATCH2 | AP3M1 |
| OTUD3 | TGOLN2 |
| PAX6 | ADGRA3 |
| HIVEP2 | PTPMT1 |
| MMP23B | RPL38 |
| SPA17 | WDR82 |
| RSPO2 | PLBD2 |
| DNAJB6 | KBTBD6 |
| LGALS8 | MAP4K2 |
| CD86 | SAMHD1 |
| COL3A1 | WNK4 |
| LPCAT1 | HACE1 |
| IL11RA | KLHL3 |
| RPL35 | USP18 |
| GBP1 | ENAH |
| RAB11FIP1 | BCL2L12 |
| ANXA11 | ZFPL1 |
| OGDH | FBXL20 |
| HDAC7 | ATP6V0B |
| SIX3 | SCARB1 |
| SUMO2 | PRPS1 |
| PSMD6 | ARRB2 |
| SF3B2 | RAP1B |
| HIPK3 | PXDN |
| CD248 | ORC4 |
| PGAM5 | DCTN2 |
| ACIN1 | SWAP70 |
| CTSH | SRSF10 |
| ATP5F1C | BLOC1S2 |
| SLC6A14 | TOR1AIP2 |
| FOXD1 | UTP15 |
| QPCTL | DHX33 |
| CASP2 | CCDC124 |
| PSMA1 | LPL |
| APOA1 | ANK3 |
| MAT1A | CTTN |
| ABL2 | SLC25A24 |
| FGFBP1 | COLGALT1 |
| PLAGL2 | PRPF6 |
| MFAP5 | SRSF11 |
| PPA1 | LYAR |
| NEFL | NKRF |
| DHRS3 | APOO |
| CCDC43 | NASP |
| SCN5A | TXLNA |
| MAP4 | CORO1B |
| ELF5 | ATP2A3 |
| HSD3B1 | ATP6V1D |
| FAM83H | ARL8B |
| NCR1 | APOLD1 |
| MSRA | PSMD8 |
| UBE2D2 | OCRL |
| RND3 | EPS8 |
| CDK14 | SHARPIN |
| RSL1D1 | PPP2R5D |
| CNN3 | LIG3 |
| TNFAIP8L3 | WDR11 |
| TERF2 | PDCL |
| PIM3 | TMEM209 |
| SPRED2 | ERCC3 |
| CLDN10 | TPI1 |
| FFAR4 | POLR2A |
| RPL18A | CYP51A1 |
| SUB1 | CLPX |
| PCDH17 | NDUFAF4 |
| AFAP1L1 | SEL1L |
| MAP7D1 | ARPC5 |
| ATXN10 | DIS3 |
| ZIC2 | EIF3E |
| DOCK4 | FARSA |
| MTHFD1L | ARIH1 |
| SUN2 | POLR1B |
| WLS | DIP2B |
| GAS7 | CIR1 |
| KCTD5 | DDX52 |
| HACD3 | MRPS18B |
| RAD21 | PDIA5 |
| RBM15 | NOM1 |
| PBX1 | NELFE |
| TFPI | KCTD10 |
| DHPS | POGLUT2 |
| HSD17B4 | RBFA |
| KDM5C | SYF2 |
| DDIT4 | H2AC21 |
| PRELP | CDH2 |
| STEAP4 | ALOX5 |
| GAS1 | MSH6 |
| EIF3D | ZEB2 |
| MAT2A | GLDC |
| TUBB6 | DLAT |
| PER1 | BCS1L |
| ABO | IDH3B |
| VMP1 | LGMN |
| SIVA1 | UBA2 |
| NKD2 | UBASH3B |
| PTGES3 | DNAJB4 |
| ADIPOR2 | WDR62 |
| RXRG | IBTK |
| HOPX | UXT |
| PFKFB2 | TNKS1BP1 |
| P2RX7 | TBC1D16 |
| MARS1 | TBC1D19 |
| RAB11A | SMIM31 |
| PICALM | COL5A1 |
| ATP6V0C | LAMA5 |
| NFIA | TNKS2 |
| DSC3 | GSTK1 |
| OGDHL | MORF4L1 |
| ZC3HAV1 | ARHGEF17 |
| EGFL6 | UQCR10 |
| KRT15 | APLN |
| MCF2 | SNRPD3 |
| DOCK7 | ZNF106 |
| DSC2 | RCN3 |
| CCL8 | CNPY2 |
| MEST | GMIP |
| AMIGO2 | DDRGK1 |
| SPI1 | TF |
| SREBF2 | AVL9 |
| NFYA | MYH11 |
| CCL4 | PRMT6 |
| SOX17 | OTULIN |
| ESM1 | TELO2 |
| TRPV1 | SNRPF |
| ARHGAP1 | FDFT1 |
| HSPA6 | CD9 |
| LRPPRC | TFDP1 |
| CAPZA1 | CDC27 |
| RPL37A | ERO1A |
| KLF3 | SAR1B |
| TNKS2 | FBXO32 |
| NAPSA | RAB37 |
| SLC25A10 | NOL6 |
| ZFYVE21 | FBXO2 |
| TOP2B | PAK1IP1 |
| GPT | STK11IP |
| AKT1S1 | NOL10 |
| SIGLEC15 | NOP16 |
| ANXA8 | RRP36 |
| S1PR3 | UTP20 |
| CYP2J2 | NCCRP1 |
| SEC61A1 | DOCK1 |
| EFHD2 | GNS |
| CAMSAP2 | KRT4 |
| CXCL17 | NDUFB9 |
| CLDN5 | CRBN |
| BCLAF1 | FABP6 |
| SULT1A1 | SH3GL2 |
| FCGR2A | MYL12A |
| LBR | STRIP2 |
| ALDH18A1 | FUBP3 |
| MAPKAP1 | BORCS7 |
| POLI | HMBOX1 |
| PRPF31 | BORCS8 |
| SNRPB | ISOC2 |
| PPP2CB | CCL18 |
| DNAJC10 | CLN8 |
| STS | AQP5 |
| ANXA2R | KIF22 |
| CKB | LLGL1 |
| MEMO1 | CLPB |
| KLK2 | GPX1 |
| GRHL2 | AKAP8 |
| DRD2 | MSH2 |
| HCFC1 | CASP10 |
| MAGED1 | LTBP1 |
| ENC1 | NRP2 |
| IGSF8 | NDUFS8 |
| RNF2 | IDH3A |
| H2BC21 | MAGT1 |
| MKNK1 | L2HGDH |
| TRIO | HDGF |
| RPS12 | ANKFY1 |
| BACE1 | SLC30A7 |
| SMAD6 | WASHC4 |
| MARCKSL1 | CIAPIN1 |
| CTSC | TAMM41 |
| NUP93 | GOLGB1 |
| MYO1D | NDC1 |
| PITPNM3 | ECPAS |
| EIF3L | TRABD |
| FAM83A | CREB3 |
| NBAS | PMPCB |
| FAM107A | NAPG |
| GNRH1 | USP12 |
| LMO7 | FLAD1 |
| NCAPG2 | CXCR3 |
| FRZB | FNDC5 |
| CYP24A1 | KLF9 |
| FABP3 | POR |
| RPS6KA6 | HSPG2 |
| NDRG3 | ALPI |
| TNFRSF10C | F13A1 |
| RARRES2 | LPIN1 |
| IL27 | LAMC1 |
| MAZ | JMJD6 |
| TOMM70 | CSRP1 |
| SUMO3 | POLR3D |
| SPINDOC | RIOK2 |
| SPAAR | SRP68 |
| DYNC1I2 | ARHGAP10 |
| DNPEP | CTNNBL1 |
| PYGB | DMAC2 |
| CAVIN1 | CASP8AP2 |
| KRT6A | RINT1 |
| RBM10 | SPATS2 |
| RNF125 | GLI3 |
| LACTB | GLI2 |
| JUNB | SPTLC2 |
| KIFC1 | TGM1 |
| PROC | BLVRA |
| EEF2K | MAPKAP1 |
| CTSZ | HAL |
| LPP | RBBP4 |
| P2RY2 | DEGS1 |
| SSBP1 | IARS2 |
| ITGAX | SRSF9 |
| MS4A4A | PPIL2 |
| COMP | UGGT2 |
| HDAC10 | ADPGK |
| FRS2 | TUT1 |
| ARID2 | GULP1 |
| DLST | VPS35L |
| ARPC1B | DNAJC16 |
| ADSS2 | DDC |
| COL13A1 | EDC4 |
| DNAJA2 | MRPL41 |
| PHLDA2 | HNF4A |
| NIFK | RDX |
| DDX27 | FBLN1 |
| CCL15 | AOC1 |
| PTRH2 | LMO2 |
| LPAR2 | PAPPA |
| KIF2A | TPP2 |
| WWP1 | JMJD1C |
| DROSHA | PHF6 |
| ABCC2 | UPF3B |
| WARS1 | AKAP12 |
| STK26 | DHX8 |
| ARID4B | ECI1 |
| RIOK1 | OBSL1 |
| POF1B | RBM17 |
| ATIC | TSR1 |
| SERPINA4 | ARHGEF11 |
| SORBS2 | NSUN5 |
| RRAD | SVEP1 |
| RGS16 | DDX50 |
| ZRANB1 | PGLS |
| VASH2 | ZFAT |
| GALNT8 | ARHGEF19 |
| JPT2 | GMCL1 |
| ARHGEF33 | MAP7D3 |
| MTR | DCAF5 |
| MBD4 | NECAB3 |
| HGFAC | ROMO1 |
| LAMC3 | PDGFRB |
| CDH20 | PDGFB |
| CSTB | NUP98 |
| A2M | SLC22A4 |
| F8 | CRHR2 |
| HSD17B10 | PNPLA8 |
| CALM1 | NCAPG |
| AFDN | RNH1 |
| DAP3 | SLC1A2 |
| ST8SIA1 | SORT1 |
| LUC7L3 | RBFOX3 |
| FOLR1 | CHCHD6 |
| TBK1 | PLIN1 |
| LTO1 | GCLC |
| CHD5 | CERS1 |
| PSMB5 | FPGS |
| HMGB2 | CAP1 |
| H2AZ2 | IRGQ |
| TC2N | ATAD3C |
| TLE3 | KBTBD7 |
| GALNT1 | MCMBP |
| CAPN1 | STAMBP |
| TOB1 | CDKN3 |
| BTBD7 | CLIC4 |
| PPARA | LLGL2 |
| BMPR1B | PRAM1 |
| SERPINC1 | MPHOSPH8 |
| PDLIM1 | RBPJ |
| MBNL1 | EFNB1 |
| CMKLR1 | ERAP1 |
| SSX2IP | DARS2 |
| DSTN | PIGK |
| HTRA3 | PTDSS1 |
| WSB1 | ADSS2 |
| SRSF5 | EARS2 |
| HP1BP3 | RHOT1 |
| RTKN | AKAP1 |
| CERS4 | PLD3 |
| SSTR1 | MAZ |
| PPP1R9B | WASF2 |
| DCUN1D1 | POLDIP3 |
| FXYD3 | RNF40 |
| SLC31A1 | SSR1 |
| DCAF6 | BASP1 |
| GREM1 | CD109 |
| IL17RA | YTHDF3 |
| ASCL2 | MCTS1 |
| MUC13 | MRPL15 |
| KLF13 | UBFD1 |
| ACTA2 | GPATCH4 |
| B4GALT1 | MRPL30 |
| EYA1 | PTRH1 |
| CISD2 | AKAP17A |
| TM9SF4 | H4C14 |
| ARMCX1 | TMEM39B |
| CTPS1 | C11orf98 |
| CNR2 | APLNR |
| SMC4 | SNRPB |
| FARSA | CDK11B |
| EPB41L2 | CCL26 |
| FAU | TCF20 |
| MMS19 | SMU1 |
| PURB | OTUD7B |
| HPGD | STAT5B |
| PTPN14 | CAST |
| SPAG9 | GLO1 |
| TNFRSF4 | SUMO2 |
| MGAT3 | CDIPT |
| BRINP3 | SEPHS1 |
| MYL2 | MIA3 |
| RPS19 | EHD4 |
| COL5A2 | KCTD5 |
| MDH1 | THOC3 |
| PPP1CC | WAS |
| SLIT1 | CEBPA |
| AEBP1 | DDR1 |
| TRAPPC9 | PLD2 |
| DSC1 | ROCK2 |
| GAR1 | EIF4A2 |
| GPRC5A | SCO1 |
| RBM5 | CNP |
| ADM2 | IL18 |
| SHCBP1 | FANCI |
| FAM210B | SYNE2 |
| RNASE1 | EIF2S2 |
| MLF2 | RHOT2 |
| H2BC13 | TAOK3 |
| PTGIS | MYO1D |
| BPTF | GOLGA3 |
| RAC3 | MRPS34 |
| SYTL2 | RIC8A |
| IGF2R | ERLEC1 |
| TCHP | PDXDC1 |
| ACAT1 | RABL3 |
| EPHA5 | SEPTIN11 |
| DDX39B | RPL22L1 |
| SNRPE | TRIM55 |
| E2F6 | GPX3 |
| DDX18 | SUB1 |
| IPO11 | MMP1 |
| RCE1 | BAZ1B |
| TNFAIP2 | TXNDC17 |
| TSPAN15 | NOL11 |
| RAB7A | DEDD |
| TJP2 | NTHL1 |
| HAMP | SNCG |
| PSMD3 | MYO18A |
| PSMD11 | TXNL1 |
| TWF1 | MYO10 |
| TMEFF2 | PPIL4 |
| ECE1 | MYO5C |
| SIAH2 | LIX1L |
| PSMB8 | VTI1A |
| FERMT1 | NPRL3 |
| FBN1 | BLM |
| MAP3K11 | DHFR |
| EFEMP2 | KRT1 |
| MPZL1 | CBFB |
| NME3 | CARD9 |
| RNF41 | HMOX2 |
| TRIM3 | CELF2 |
| AMOTL1 | EFEMP1 |
| ZFP91 | NSUN2 |
| FILIP1L | PISD |
| PADI4 | SERPINB6 |
| IQSEC1 | NAXE |
| EIF3E | UBR5 |
| SDC4 | PSMD9 |
| BTG3 | CBX5 |
| DCT | OS9 |
| NAV3 | ETF1 |
| BAG3 | RCN1 |
| MAF | STX2 |
| TMPRSS6 | TMCO1 |
| KCNN4 | ZDHHC5 |
| WWP2 | DCAF7 |
| BCAM | MMS19 |
| EIF3G | QSOX2 |
| RHOV | SYNGR2 |
| VAPB | NENF |
| BZW1 | MED19 |
| PLAG1 | RETSAT |
| RNF20 | MRPL21 |
| SPECC1L | EMC7 |
| LIN7C | CA2 |
| SUDS3 | RUNX1 |
| TPD52L2 | APPL1 |
| WDR74 | SLC38A1 |
| UACA | PDLIM7 |
| NCCRP1 | SNX10 |
| LOXL1 | GSDMA |
| RAB14 | ARL8A |
| PPP1CB | MYBPC3 |
| LAMA2 | ATXN10 |
| MPC1 | CHCHD2 |
| PSMC5 | NIPA1 |
| PF4 | GPI |
| POLR2B | IRF2 |
| HNRNPH3 | MYO5A |
| TBX19 | SH3GL1 |
| TNFSF12 | MYL6B |
| AK4 | LIMCH1 |
| SHARPIN | CISD1 |
| CTNNAL1 | DNMT3A |
| FMNL1 | ADAM17 |
| PAF1 | CSNK1D |
| PPFIA1 | CSK |
| SNRPD3 | DDB2 |
| USP39 | GNAI2 |
| PAPSS2 | HSD17B4 |
| TOMM40 | NME1 |
| RPS15 | S1PR1 |
| STIM2 | SLC12A6 |
| SNRPB2 | GNA13 |
| RAB40B | KIF2A |
| CPEB2 | CBR1 |
| YY2 | COQ6 |
| MAML3 | DUSP3 |
| PLEKHS1 | EED |
| GRB10 | EXOSC3 |
| FGF22 | UBR1 |
| IL7R | DCXR |
| NCR3LG1 | GNB4 |
| CD46 | GPAA1 |
| WDR1 | SLC4A2 |
| RNF180 | PCYT2 |
| PDGFD | PITRM1 |
| SERPINB6 | ARPC3 |
| GTF2I | CEP63 |
| ITGAL | ETS2 |
| AHNAK2 | PPA2 |
| CD209 | SF3B2 |
| PNP | SNX5 |
| TMSB15A | EGFL7 |
| TH | RNPEP |
| CHD3 | SDF4 |
| PDK4 | WASHC5 |
| STK39 | ZC3H14 |
| NOP56 | CENPB |
| PSMA5 | NDFIP1 |
| ICMT | NEMF |
| KIF3B | SLC16A4 |
| KLK13 | TAF1C |
| RCN2 | EIF3I |
| DCAF7 | EDEM3 |
| LUC7L2 | ITM2A |
| SUGT1 | NCEH1 |
| BCL6B | PDS5A |
| FRAT1 | RO60 |
| NOP14 | DNAJC2 |
| P4HA3 | GPN1 |
| DNTTIP1 | NEDD1 |
| ELMO3 | SRSF5 |
| SRP14 | ARID3A |
| TXNDC12 | DERA |
| FAM98A | GTF3A |
| CBX7 | COPS4 |
| CYP27B1 | ERGIC2 |
| EHD1 | TRIAP1 |
| PARP4 | ZRANB2 |
| ALDH7A1 | FOXRED2 |
| CDH4 | TMEM259 |
| FHL1 | LRRC47 |
| PTGER3 | DMPK |
| CITED2 | SGSH |
| RSU1 | SERPINI1 |
| STOM | LARP7 |
| CADM2 | RHBDF1 |
| POR | ANKDD1A |
| SLC2A4 | ZEB1 |
| ABCC5 | CTCF |
| GCG | NR3C2 |
| ELANE | PSMD7 |
| ATF6 | ITIH4 |
| PDX1 | MYO1E |
| C5AR1 | SCAP |
| RND1 | KRT15 |
| CD69 | CXCL5 |
| TRPV4 | YTHDF1 |
| OAT | MYL12B |
| GABRA3 | UACA |
| ITPR3 | CTNS |
| LMAN1 | MYOT |
| PANX1 | PSENEN |
| HPX | AP1B1 |
| KSR1 | RNF152 |
| XPNPEP2 | PRKG1 |
| ARF4 | MRE11 |
| DACT1 | MECOM |
| LSR | AFP |
| IFIT2 | DGAT1 |
| CPEB3 | AKR1C2 |
| NEDD1 | PPP2R2A |
| NACA | SET |
| GLIS1 | CHKA |
| RBMS3 | GJB5 |
| ITGBL1 | LAS1L |
| CCDC178 | DNAJC11 |
| H4C14 | GTF3C3 |
| GALNT3 | MRPL37 |
| RARRES1 | GNL3L |
| TFDP1 | B2M |
| SNAP25 | MAP2K4 |
| TRIM27 | KIF11 |
| TLE1 | SLC4A1 |
| SMAD5 | CSNK1E |
| MSI1 | SLC29A1 |
| CCDC47 | FECH |
| APMAP | PTK6 |
| MT2A | PTPRA |
| EOMES | NFS1 |
| GSTO1 | POLR3A |
| KAT8 | UBE2A |
| CCNH | DOT1L |
| CHST11 | MED12 |
| RHCG | SNRPN |
| ADORA2B | AP2S1 |
| TRPC1 | BAMBI |
| MACROD1 | CTNNA2 |
| TERF1 | GADD45A |
| ACHE | GGH |
| DNASE1 | PMP22 |
| DFFB | SBDS |
| TACC3 | SF3B4 |
| IFITM3 | AHSA1 |
| BAG2 | CLP1 |
| MOV10 | MAN2A1 |
| RALGDS | S100A6 |
| TNRC6A | TUSC3 |
| RBM39 | CYB5B |
| SCYL2 | LGR4 |
| CST1 | AKR7A2 |
| SPCS2 | PIGO |
| NUDCD1 | PPIG |
| ALDOB | ACP2 |
| CHL1 | IQGAP2 |
| NOD1 | LMAN2L |
| LMX1A | MICA |
| PSMD13 | MPZL1 |
| UTRN | PPP1R8 |
| DUSP19 | CERS6 |
| NAGK | LDB1 |
| CNKSR1 | OTUD5 |
| STAB2 | RBMS1 |
| ATAD3B | TOR1B |
| SEPTIN6 | RPP30 |
| FBXL5 | EMC10 |
| TACC2 | HSD17B8 |
| MAEL | MCRS1 |
| N4BP3 | VTA1 |
| CAPN2 | BLOC1S5 |
| TNFRSF10D | LSM5 |
| UPP1 | MTG2 |
| LILRB2 | P3H4 |
| SELENBP1 | PWP2 |
| IL17F | RCL1 |
| TERF2IP | UTP6 |
| DACT2 | GOLIM4 |
| BHLHE40 | DDX49 |
| NAT2 | HERC4 |
| TIE1 | PPWD1 |
| P4HA1 | TMED2 |
| APOD | TTC1 |
| RBFOX3 | XXYLT1 |
| HADHB | FNDC3A |
| COL6A1 | MAK16 |
| CHRNA7 | NPM3 |
| PLS1 | PARD6B |
| PRMT6 | RRP9 |
| TRIM2 | TMED4 |
| FBXO3 | CCDC93 |
| PCCA | CEP170B |
| SMARCD1 | CHTOP |
| SNX6 | H2BC11 |
| PPP2R2D | TMED7 |
| MAPT | RNF149 |
| LIPA | WASHC2C |
| SLC12A5 | ENDOD1 |
| PDHB | METTL17 |
| MUC5B | NIPSNAP3A |
| NUDC | DMD |
| RPS29 | ELANE |
| ATG10 | STAT2 |
| MRPS23 | C5 |
| UGGT1 | GCDH |
| SOX13 | NME2 |
| LONP2 | NPR3 |
| EXOSC4 | PLA2G1B |
| HOXD3 | UBE2K |
| TMED2 | PRKAR2A |
| S100A16 | MUC2 |
| GRAMD4 | SCRIB |
| PRPSAP2 | SUPT5H |
| ZCCHC3 | CPNE1 |
| CENPE | ERAP2 |
| ST3GAL1 | REEP2 |
| VSNL1 | SIRT4 |
| HIF3A | PLA2R1 |
| XAF1 | TMX3 |
| ZNF326 | LMCD1 |
| TMPRSS3 | SESN3 |
| TRAF1 | TCHP |
| AP3B2 | HECTD1 |
| CMPK1 | SNAP25 |
| LMO3 | VKORC1 |
| LAPTM5 | CCNH |
| PPIB | ANK1 |
| ACADVL | ARID1A |
| COL17A1 | SRF |
| DYNC1H1 | LMX1B |
| HSPA1L | MED23 |
| PPM1F | RNMT |
| SCARA5 | ALOX12B |
| H2AC4 | CTDP1 |
| HMGN5 | P2RX6 |
| EED | PIGR |
| CEP55 | UROS |
| PLXDC1 | VARS2 |
| ALPL | BRF1 |
| KL | NOP10 |
| HYAL2 | ARL2 |
| HLF | CCDC22 |
| ARHGEF39 | MPST |
| ASCL1 | POLR2L |
| PTGDR | UBA7 |
| CASP6 | FUBP1 |
| CUX1 | GTF2B |
| DDX20 | KMT2B |
| CREB3 | PRSS21 |
| WIPF1 | RFK |
| F2RL2 | SUPT4H1 |
| GALC | BRF2 |
| TPR | GRPEL1 |
| RAD18 | PITPNB |
| SVIL | RABGGTA |
| DAAM2 | MARCHF5 |
| KTN1 | MED14 |
| MRPL44 | FBXO28 |
| NCKAP1 | GCA |
| STRN4 | HERC3 |
| MISP | MYLIP |
| ATP1A3 | QRICH1 |
| NR1H3 | TRIM31 |
| CDC45 | KANSL3 |
| ANTXR1 | LSM7 |
| PTPRB | MED28 |
| TNFSF13 | NIP7 |
| TOP3A | RSL24D1 |
| SLC25A24 | XPO6 |
| ECH1 | RALGAPB |
| LRRFIP1 | RLF |
| XPOT | TAF1B |
| IGSF9B | ACAD11 |
| PELO | PLP2 |
| REPIN1 | TAF7 |
| WDR6 | ZNHIT1 |
| CLNS1A | CNN2 |
| RBMS2 | LPAR5 |
| NR3C2 | MRPL33 |
| SLC29A1 | MED11 |
| MIB1 | MED18 |
| ADA | ZNF160 |
| GSK3A | ATXN7L3 |
| TRIM37 | EIF1AD |
| SPRR2A | FIBCD1 |
| NUMBL | LSM8 |
| RAB2A | POP7 |
| KIF27 | RSRC2 |
| ANGPTL3 | ARMC6 |
| ATXN3 | CENATAC |
| TALDO1 | COMMD3 |
| CARD9 | MRPL17 |
| SPTLC1 | NBPF15 |
| NR2F1 | RAVER1 |
| CLIP1 | RPP14 |
| PRKCSH | UBE3D |
| LIPG | COMMD2 |
| MCCC2 | RPP21 |
| MAN2A1 | SYS1 |
| RPS17 | DNLZ |
| TMED10 | NR1D1 |
| CERK | PCLO |
| H2AZ1 | TMEM97 |
| OTX1 | ANKRD49 |
| TSPAN12 | PJVK |
| ABCF2 | SIDT1 |
| AKAP8 | PFN2 |
| BAG6 | HRNR |
| MYH4 | FLT1 |
| B4GALT3 | PSMB3 |
| NEIL3 | FOXP3 |
| SMC2 | NEU1 |
| SRP68 | B4GALT1 |
| PABPC3 | SMS |
| TMBIM6 | TAOK1 |
| RPS4Y1 | RPS20 |
| ZNF185 | USP1 |
| SUV39H1 | THOP1 |
| KCNJ3 | COG1 |
| RORC | GAS8 |
| TRAF5 | NFE2L1 |
| PAG1 | WWTR1 |
| CALCR | BABAM2 |
| ROR2 | MCUR1 |
| RBMS1 | PNN |
| C5 | SAV1 |
| AIMP1 | NRSN2 |
| STAMBP | TM9SF3 |
| UBB | PRPF38B |
| UFD1 | DPM1 |
| DPM1 | MAPKAPK2 |
| PAICS | KRT6A |
| IL16 | RHOC |
| CLTCL1 | AXL |
| UBASH3B | VWF |
| ALG13 | CYBA |
| LGALS2 | PEX1 |
| AP1G1 | CRTC1 |
| ECI1 | ARAP3 |
| GEMIN5 | ATL1 |
| INSIG2 | LGALS2 |
| SFXN1 | TRAPPC9 |
| FNBP1L | DUSP19 |
| SPSB3 | SRP19 |
| TMEM116 | HS1BP3 |
| SSRP1 | CST1 |
| RASSF6 | UBP1 |
| ZNF281 | MMP13 |
| HUWE1 | CCNE1 |
| DPEP1 | SORD |
| CKS1B | GLP1R |
| ADGRF5 | POU5F1 |
| SULF2 | ARHGEF1 |
| FOXN3 | GYG1 |
| SFRP4 | PAFAH1B1 |
| F5 | CD74 |
| DMD | EXT2 |
| CDCA3 | TJP2 |
| AOC3 | P4HA2 |
| CBX2 | CDH17 |
| LONP1 | ZYX |
| LARS1 | CNOT3 |
| BCL11A | STX3 |
| RANBP2 | BACH1 |
| SEC63 | CHM |
| DAPK3 | COL12A1 |
| TARS1 | UBE2S |
| VPS37A | GMPPA |
| MELTF | HBA2 |
| RFC4 | NSD3 |
| DCTN2 | PGM2 |
| KATNA1 | PTPN23 |
| ATXN2L | SLC4A7 |
| MTREX | SON |
| SIN3B | UBE4B |
| DPT | ARFGAP1 |
| SUCNR1 | CHD1L |
| TINAGL1 | DRG2 |
| ZBTB11 | RNF20 |
| CHTOP | RPL32 |
| DEPDC1 | AK4 |
| H4C9 | EPS8L2 |
| LZTS2 | EXOC6 |
| PHF20L1 | FBXO3 |
| MFSD4A | LUC7L3 |
| GPT2 | POLA2 |
| TNFRSF9 | STARD7 |
| H3C12 | KANK2 |
| MFN2 | RASD2 |
| NECTIN3 | CDC123 |
| ETV6 | GCAT |
| ACVR1 | TXNDC5 |
| PIP5K1C | CEP78 |
| GNAI3 | GTF3C1 |
| SIRT5 | RNF114 |
| DVL3 | CLUH |
| ANXA6 | TYSND1 |
| DLX2 | CMTM7 |
| MUC3A | LRWD1 |
| HSPA2 | PDCD2L |
| KIF4A | FKBP9 |
| CDH16 | TTC13 |
| USP33 | TEDC1 |
| ARRDC3 | BCL2L15 |
| LARP4 | PDCD1 |
| MPO | CNR2 |
| PCDH10 | NIBAN1 |
| DEPDC1B | SLC66A1 |
| RRAS2 | SLC35F5 |
| GPD2 | SLC12A2 |
| AP3D1 | BCL6 |
| KATNB1 | PCCB |
| DPP9 | YES1 |
| MAGT1 | ARNT |
| ATP5PB | HELLS |
| BAZ1A | NT5C2 |
| OAS2 | PYCR2 |
| RAB5B | IRF4 |
| IFITM2 | LARS2 |
| PDXDC1 | ROBO1 |
| HSPA4L | ACAD9 |
| CCDC66 | NTF3 |
| BTNL9 | PGAM1 |
| SEL1L | RDH12 |
| PPP3CA | BPTF |
| DAAM1 | DIAPH3 |
| PSMD9 | HAGH |
| GNAI2 | PRMT7 |
| AARS1 | STRADA |
| PLAA | ANK2 |
| SEMA7A | COX15 |
| UBTF | CRTAP |
| HGS | ELAC2 |
| YARS1 | ERC1 |
| LLGL1 | FADS1 |
| PIP5K1A | IL22 |
| FUCA2 | PALLD |
| IRX5 | SDC4 |
| LSM4 | ANLN |
| RNF40 | PRPF3 |
| FSTL3 | SERPINB1 |
| RAI14 | TNPO3 |
| ATMIN | CARS2 |
| DOCK5 | KPNA4 |
| ZNRF3 | MBD3 |
| FBXL7 | NCKAP1 |
| DNAJA4 | PAPSS1 |
| CLIP4 | PARS2 |
| EIF3H | SMARCAD1 |
| CPB1 | ECEL1 |
| EPC1 | FASTKD2 |
| PTPN2 | GEMIN2 |
| CSF3R | GMFB |
| ADAMTS13 | MAP3K6 |
| PAX5 | MRPL12 |
| CCL11 | NFIC |
| CLOCK | STRADB |
| ST3GAL4 | TOP3B |
| CDC27 | BRAT1 |
| LARP7 | DDX18 |
| UBE2E1 | GLMN |
| FAM3B | PPT2 |
| PPP1R13B | RABGGTB |
| LDOC1 | SCRN1 |
| FAAH | DNPEP |
| CAMKK2 | LIN7C |
| DNAJB1 | MRPL40 |
| ASF1B | NADK2 |
| DLGAP5 | SEC23IP |
| H2AC20 | GRSF1 |
| C1orf116 | HPCAL1 |
| ALOX15B | PPFIA1 |
| UBE3A | PSMG1 |
| POLDIP3 | TXNDC15 |
| TBX3 | WNK2 |
| TBX1 | DNAAF5 |
| KLF15 | ERP29 |
| PRC1 | LACC1 |
| SAP30 | MRPS26 |
| FAIM2 | SPCS3 |
| EHD2 | TMTC3 |
| SPIN1 | RABEP2 |
| PAEP | APMAP |
| RHBDD1 | COPS7B |
| RSAD2 | APOBEC3C |
| EIF3I | CLNS1A |
| TDO2 | HAUS7 |
| AP3B1 | PAIP1 |
| KAT6A | PCYOX1 |
| GMPS | RBM3 |
| PSMB6 | ST6GALNAC4 |
| SAMHD1 | THUMPD3 |
| PIP5K1B | CNOT6 |
| SRI | LMF2 |
| UBQLN2 | NOMO2 |
| AGGF1 | ZNF326 |
| CPEB1 | DCAF11 |
| DECR1 | DNAJA4 |
| IL17B | PM20D2 |
| THOP1 | UBLCP1 |
| TSLP | WDTC1 |
| ERP44 | GTPBP6 |
| NPLOC4 | WDR75 |
| NUP210 | THEM6 |
| CEP170 | TIAM1 |
| SLC2A12 | TLR8 |
| DCAF8 | CD34 |
| SRGAP2 | WIF1 |
| CCL28 | PTP4A3 |
| FBXO28 | CD68 |
| GABPA | RFWD3 |
| SEC16A | CREB5 |
| DCAF13 | ZNF32 |
| LUZP1 | NPLOC4 |
| HSDL2 | DNM1 |
| OBI1 | MMP2 |
| ZNF677 | POU2F1 |
| NCOA4 | ARHGAP5 |
| PKD2 | BAIAP2 |
| MAP3K3 | CDSN |
| PRDM1 | A2ML1 |
| PRDM16 | TRAPPC10 |
| CLCN3 | ATP6V0D2 |
| TNNC1 | FBXO31 |
| DIXDC1 | IBA57 |
| GALNT7 | TAF8 |
| KLF10 | RNASE7 |
| SSTR3 | TTLL12 |
| APOBEC3G | IGLL5 |
| CA1 | GORASP2 |
| KLK8 | MYH14 |
| CPNE1 | MYL3 |
| PRSS21 | PKP2 |
| HERC5 | UNC45B |
| FAM136A | MSTN |
| LEMD1 | TCF3 |
| PPL | FHIT |
| POTEE | DUOX1 |
| ECHS1 | BCL9 |
| ARPC3 | EDC3 |
| PAFAH1B3 | GAST |
| PCLO | INPP4B |
| GJB4 | USP4 |
| CNTRL | LSM4 |
| MLEC | MBD5 |
| RAB21 | CSPG5 |
| TMED7 | KIF20B |
| SLC39A4 | LENG9 |
| ST6GALNAC6 | LEMD3 |
| MC1R | ATL2 |
| INSM1 | ADAM10 |
| MSX2 | GSR |
| SERPINF2 | LAMB1 |
| POU3F2 | SPR |
| THADA | CDC25A |
| MAP4K3 | GALNS |
| COL4A1 | HADH |
| BRD7 | KITLG |
| PTGER1 | L1CAM |
| ARL6IP5 | PLCD1 |
| ATP2A2 | CACNA2D1 |
| SMC3 | DIAPH1 |
| TNFRSF17 | PCCA |
| ABCD3 | PDXK |
| HERC2 | DUSP1 |
| PSPH | EHMT1 |
| DOCK6 | FGF2 |
| CD2AP | GATM |
| PTPRU | LOXL2 |
| RAD17 | PIAS1 |
| SF3B4 | GDA |
| NOL3 | PLCB4 |
| SNAP23 | ALPP |
| SLC35A2 | ANTXR1 |
| SYNE2 | CHGA |
| ELF4 | CXCL10 |
| FIS1 | DLC1 |
| LRRC8A | GFM1 |
| SGK3 | LRPAP1 |
| RECQL5 | MAN2B1 |
| SAR1A | PPID |
| COX7A2 | ADAM15 |
| CSTF1 | AIP |
| GRSF1 | CNTNAP1 |
| DDX47 | COX6B1 |
| HOXD8 | GLRX |
| KRR1 | S1PR5 |
| QARS1 | SEMA3C |
| CLUH | TSFM |
| NOM1 | CDC42BPB |
| RGS22 | FKBP10 |
| TMEM33 | GCLM |
| ZNF609 | GCSH |
| H2BC18 | LAMC3 |
| ODR4 | NDUFA6 |
| BBS9 | OSGEP |
| JAK3 | S100A2 |
| SLCO1B3 | SLC39A7 |
| UBE2T | WWP2 |
| PROCR | ATP11A |
| ZNF148 | DNASE2 |
| GIT2 | NET1 |
| ITIH1 | POGLUT1 |
| MAML2 | CMPK1 |
| UBL4A | CNPY3 |
| RASSF2 | FREM1 |
| TRA2A | H2AZ1 |
| GP1BA | KIF21A |
| EGR2 | PIP5K1A |
| SLC34A2 | RAP1GDS1 |
| HNRNPDL | SNRPE |
| FADS2 | BAZ1A |
| ELP3 | CNOT2 |
| AMD1 | DLGAP5 |
| ADAMTS9 | EOGT |
| FGD5 | FUT1 |
| LAYN | HACL1 |
| ASAP3 | KLF15 |
| MAP2 | LYRM7 |
| DKK2 | MEST |
| FGB | MYH4 |
| ERBIN | NUCB1 |
| C1GALT1 | P4HTM |
| MEX3A | SFXN4 |
| RELB | AFAP1 |
| IGFBP6 | BAIAP2L1 |
| LYZ | BOLA3 |
| TNPO1 | CDYL |
| CAPZA2 | COA6 |
| USP8 | CSNK1G3 |
| EXOC7 | DMAP1 |
| SRPX2 | GPRC5A |
| TRA2B | INCENP |
| ATG4A | NDUFB6 |
| PLEKHA7 | OLFM1 |
| UNC45A | PCDH7 |
| NKRF | PIGG |
| CRIP1 | PLPP2 |
| ANKHD1 | PLXNB2 |
| CMTM8 | ATRN |
| RASSF10 | CPA4 |
| PEPD | DDX59 |
| SHROOM3 | FAM3C |
| NT5C2 | NCOA7 |
| MCCC1 | SNAPC4 |
| NNT | BCAS2 |
| IARS2 | CCDC134 |
| JAM2 | CRELD2 |
| TAF4 | DNAAF4 |
| ABHD12 | FADS3 |
| MASTL | FNBP1 |
| XRN2 | KCTD12 |
| ARPC5 | MAST3 |
| COQ8B | MOB1A |
| ORM1 | MORF4L2 |
| PSMB3 | NAPRT |
| PLA1A | NIF3L1 |
| GFPT2 | NUB1 |
| S100A12 | RAD1 |
| EDC4 | SH3PXD2A |
| ESYT1 | CEP72 |
| RPP30 | KCTD15 |
| AMER1 | KLHL8 |
| CSTF3 | MAP3K15 |
| STRN3 | P3H3 |
| WDHD1 | POFUT2 |
| RMDN3 | RPRD1B |
| OSBPL3 | SDF2L1 |
| FKBP3 | STRBP |
| GTF3C4 | TOR3A |
| NEURL4 | TSPAN6 |
| SCEL | CROCC |
| MRPS31 | GXYLT1 |
| CYTL1 | MRPS11 |
| PLAGL1 | NOA1 |
| SNRPN | TEFM |
| HIF1AN | BCL6B |
| LARGE1 | BOD1L1 |
| SCRIB | BOP1 |
| SPEN | CEP112 |
| BOK | GALNT7 |
| ECD | POGLUT3 |
| NELFB | RASSF2 |
| ELN | SCARA3 |
| CLIC3 | TTC17 |
| REL | ZNF24 |
| CD226 | CAB39L |
| XPC | LYPLAL1 |
| STAT2 | METTL16 |
| HELLS | MRPL34 |
| CYP51A1 | MRPS17 |
| MCOLN1 | NAA30 |
| NLRP1 | NAA35 |
| ATP2A3 | NOL7 |
| CLDN11 | RPP38 |
| KANK1 | SPCS1 |
| NUDT1 | TRMT11 |
| PDSS2 | ABHD17B |
| GSDMD | GPR180 |
| NXN | IAH1 |
| OS9 | MFSD12 |
| SNRNP70 | MRPL45 |
| UNC5B | MRPS21 |
| AMOT | NAA40 |
| GATAD2A | PRPSAP2 |
| IFIT3 | TBC1D13 |
| RNF6 | TXNDC12 |
| RPL36 | UBL7 |
| CAVIN2 | ACOT1 |
| FBXW2 | CHID1 |
| LY6K | FBXL15 |
| TRIM23 | H2AC12 |
| MRPS27 | RASSF4 |
| NKD1 | ARHGEF40 |
| ZNF350 | ARRDC1 |
| RBM47 | BTBD8 |
| ZKSCAN3 | DZIP3 |
| IGSF9 | SMYD5 |
| TBC1D16 | CERCAM |
| KRBOX4 | DNTTIP2 |
| ST7L | NPEPL1 |
| EML4 | PLEKHA2 |
| MT1E | SURF6 |
| PRKD2 | TAGLN3 |
| NUP62 | TMEM109 |
| ALOX12B | QTRT2 |
| FLG | C19orf53 |
| PCSK6 | DCUN1D5 |
| SCUBE2 | EMILIN3 |
| HOXB5 | RTL6 |
| TNFAIP8L1 | ANTKMT |
| VSIG4 | NAPB |
| CYP2C9 | EPC1 |
| EFNB1 | SLC43A3 |
| FTL | LSM14A |
| ALOX5AP | RRP1 |
| ANK3 | RABIF |
| EEA1 | STK26 |
| CCDC6 | AK2 |
| GDI2 | DBI |
| EXOC8 | SLC5A5 |
| PARVB | CST3 |
| THOC3 | MAP2K5 |
| TSPO | MAP3K12 |
| ACSL1 | SLC25A19 |
| IFI16 | SLC31A1 |
| CENPJ | FCGR3B |
| RBM8A | NLRP2 |
| ASH1L | AGGF1 |
| CEP290 | CUL7 |
| NCAPD2 | ITPKB |
| RAPGEF1 | HPR |
| SYNPO | HSF2 |
| TOP3B | STAMBPL1 |
| UBE4A | ALPK1 |
| UBR4 | H3C12 |
| MDN1 | H3C2 |
| MYEF2 | JOSD1 |
| ACTR1A | JOSD2 |
| CCPG1 | MEX3C |
| PATJ | SP8 |
| MTCL1 | WRNIP1 |
| ARPC5L | CAPS |
| PPP4R1 | H3C3 |
| TROAP | H3C6 |
| EPPK1 | HILPDA |
| OIP5 | H3C10 |
| DNAJC27 | H3C11 |
| NUDT13 | PRDM10 |
| GFPT1 | MRPS10 |
| SPHK2 | H3C8 |
| CPA4 | H3C7 |
| PRKCG | PLEKHO1 |
| FTH1 | OSCP1 |
| COL4A2 | RBIS |
| DYRK2 | SPAST |
| USF1 | KRT10 |
| SPRED1 | PNPLA3 |
| CUL7 | PFKFB2 |
| KRT6B | PCDH17 |
| PDLIM7 | EFHD2 |
| FXR2 | LRCH3 |
| MAT2B | SNAP47 |
| AIFM3 | CASK |
| GRHL3 | BMPR1B |
| PDCD6 | RYR1 |
| FBXO5 | SLC40A1 |
| TPST1 | VCL |
| TNFAIP1 | GOT1 |
| ATG12 | SIRPA |
| JAZF1 | TET2 |
| PIM2 | PRDX3 |
| MAGI1 | AKR1A1 |
| BMPER | CHD2 |
| OTUD7A | SKIL |
| RNGTT | ARCN1 |
| SCFD2 | ATP5F1E |
| GLDC | RNF8 |
| ELMO1 | SUMF1 |
| SCG2 | MORC2 |
| APLP2 | SLC30A1 |
| RCN1 | STK33 |
| HNRNPA0 | BTN3A1 |
| FADS1 | CCNT1 |
| PTPRF | LRRC8A |
| P2RY12 | RBM4 |
| MYLK2 | ALDOC |
| AHSG | CLEC12A |
| HTR1D | DLGAP4 |
| KCNA5 | VAT1 |
| CHN1 | RAET1E |
| EGLN2 | EML3 |
| RB1CC1 | PIP4P2 |
| THPO | PSMG3 |
| ADORA3 | CREBRF |
| SEC23A | MXRA7 |
| SH2B1 | BLACAT1 |
| KIF3A | KCNQ1 |
| ALDH1L1 | KCNK3 |
| EPHA10 | P2RY12 |
| SRSF9 | FOXA2 |
| CLCA1 | P2RX7 |
| CYBRD1 | SLC6A1 |
| LIPH | ADH5 |
| SCG5 | FANCL |
| LHX2 | GDF5 |
| MYL12A | SOCS1 |
| PTCD3 | EPHX1 |
| ARL2BP | SCO2 |
| GPR4 | ABCG1 |
| BASP1 | EGLN2 |
| SFRP5 | F2RL1 |
| USO1 | FGF14 |
| H4C12 | NFIB |
| RNF187 | PDK4 |
| ZNF322 | RAC3 |
| NOD2 | SLC22A3 |
| CHD8 | CHST3 |
| ENTPD5 | FABP1 |
| PHF1 | ITPKC |
| HVCN1 | SFRP4 |
| KIR2DL4 | ACAA2 |
| TRIM11 | DOCK7 |
| GOSR1 | ACKR3 |
| TMED9 | CPA3 |
| NT5DC2 | FANCF |
| CYP27A1 | INPP5E |
| DFFA | CD93 |
| ICOSLG | CLDN7 |
| MBD1 | COX8A |
| PPIG | CXCL2 |
| PATZ1 | HAPLN1 |
| TP53AIP1 | OBSCN |
| ITGA2B | ADAMTS7 |
| JMJD6 | BOC |
| PDCD10 | GPM6A |
| PROK2 | MYOM1 |
| NLK | P2RX5 |
| FAT4 | SLC35C1 |
| AFAP1 | SLCO1A2 |
| RBBP6 | CA7 |
| AJUBA | CALCB |
| CBLL1 | IDH3G |
| CPVL | PANK4 |
| OCIAD1 | RIMS3 |
| RHOJ | TEAD4 |
| CMTM3 | MTSS1 |
| ABCA2 | ASB2 |
| CNOT1 | FGFBP1 |
| STXBP3 | HCAR1 |
| GUF1 | RCHY1 |
| NUTF2 | TRIM3 |
| EFHD1 | AKR1E2 |
| ITPRID2 | DNAAF2 |
| MAOB | IPPK |
| OLFM1 | YIPF1 |
| ENPP1 | CLVS1 |
| SLC17A5 | SUPT3H |
| SOSTDC1 | DKKL1 |
| PPP1R12B | DPF3 |
| FGF10 | HSF2BP |
| MT1X | LARP1B |
| HABP2 | PHYHIP |
| PTPRZ1 | SLC35B3 |
| EHMT1 | CD163L1 |
| UQCRC2 | RBM18 |
| TAT | STK32A |
| PITX1 | ZNF189 |
| SETD1A | PLEKHF2 |
| WDR26 | UBE2Q1 |
| MCM10 | DZANK1 |
| OSBPL5 | REP15 |
| DCP1A | FAM13B |
| ST6GALNAC2 | IHO1 |
| INHBC | TMEM203 |
| OTUD1 | C1orf210 |
| ADK | KIAA1549L |
| SMPD1 | KRCC1 |
| CPE | TEX38 |
| RYR2 | ZNF681 |
| CR2 | MSN |
| CS | CLK4 |
| GDI1 | FBXO27 |
| DDX6 | VPS26C |
| CYC1 | DOP1B |
| SLC52A3 | GDNF |
| OXSR1 | CNBP |
| DHX36 | SPG7 |
| EXOC4 | RPS6KA3 |
| PAX4 | AXIN2 |
| UCHL5 | GFRA1 |
| CCDC88C | GPT2 |
| LIN7A | TNFSF13B |
| MAGED2 | VCAM1 |
| MEOX1 | BGN |
| CKAP2 | FUT2 |
| DHRS2 | KLK6 |
| RGS1 | SOCS3 |
| TIGAR | STXBP2 |
| TRAPPC10 | KIF1B |
| ATE1 | MYOCD |
| PLA2G3 | LPA |
| CHAF1A | MTA1 |
| MRPS34 | ADGRV1 |
| BAG4 | KCNH7 |
| GPSM1 | ADAM28 |
| PGPEP1 | KCNIP1 |
| TMEM88 | SYNPO |
| RBMXL1 | CDC5L |
| MICA | DAZAP1 |
| FBXO9 | PACSIN2 |
| C11orf58 | PAFAH1B2 |
| HAPLN3 | TUBGCP4 |
| PAFAH1B1 | ASAP1 |
| ADAM22 | MRPS7 |
| UPK3A | MSI2 |
| XDH | CDK3 |
| HSD3B2 | PIF1 |
| DHRS9 | SEPTIN3 |
| DNAH8 | SFXN3 |
| NMT1 | KIAA1217 |
| PKN3 | ASAP2 |
| ISL1 | FEZ2 |
| GSTA1 | AEN |
| FDXR | MRPL35 |
| MTMR2 | IFIT5 |
| PPIF | TTC28 |
| SOX5 | ZNRF2 |
| M6PR | PLA2G6 |
| PICK1 | COL4A5 |
| RPS26 |  |
| TRIM32 |  |
| COL10A1 |  |
| JARID2 |  |
| CLEC3B |  |
| FABP6 |  |
| ITGA11 |  |
| NUCB1 |  |
| PCDH8 |  |
| GALNT14 |  |
| TNS3 |  |
| RCHY1 |  |
| NIBAN2 |  |
| OTUB2 |  |
| KIN |  |
| RAB11FIP4 |  |
| RAB3D |  |
| URGCP |  |
| HOXC9 |  |
| FOXS1 |  |
| C3orf70 |  |
| SPINK6 |  |
| BRD9 |  |
| MRPL19 |  |
| MOAP1 |  |
| GUSB |  |
| CACNA1G |  |
| VLDLR |  |
| CARD11 |  |
| DLAT |  |
| PSMB4 |  |
| MAP3K20 |  |
| DST |  |
| GGH |  |
| PCNT |  |
| PLIN2 |  |
| HOMER1 |  |
| NDUFA4 |  |
| WWC1 |  |
| PDGFRL |  |
| ELMO2 |  |
| RAE1 |  |
| SMPD3 |  |
| TIMELESS |  |
| GEMIN4 |  |
| LRRC32 |  |
| RPL32 |  |
| UAP1 |  |
| AKAP10 |  |
| SCIN |  |
| WBP2 |  |
| RGMB |  |
| SEMA6B |  |
| ANAPC11 |  |
| BICC1 |  |
| SNPH |  |
| TRIM14 |  |
| GSDMC |  |
| RPL36AL |  |
| WASHC1 |  |
| PDRG1 |  |
| SHISA3 |  |
| DDAH1 |  |
| NAB2 |  |
| CYP11A1 |  |
| NRF1 |  |
| RASA2 |  |
| ITGB1BP1 |  |
| AHCY |  |
| GOT2 |  |
| ACSL4 |  |
| LPIN1 |  |
| SERPING1 |  |
| HMGCS2 |  |
| EIF4A2 |  |
| IRF4 |  |
| TXNRD2 |  |
| PIP4K2A |  |
| TUBA8 |  |
| CBR1 |  |
| MAPRE1 |  |
| MGP |  |
| SMYD2 |  |
| STK3 |  |
| FBXW11 |  |
| PNKD |  |
| POU2F2 |  |
| TUBGCP6 |  |
| GINS1 |  |
| PCOLCE |  |
| SUSD2 |  |
| CITED1 |  |
| CLEC6A |  |
| API5 |  |
| CECR2 |  |
| JCHAIN |  |
| MCUR1 |  |
| NARF |  |
| NMI |  |
| CTDSP1 |  |
| NASP |  |
| CEACAM4 |  |
| IMP3 |  |
| MYDGF |  |
| NUFIP2 |  |
| SPRR1A |  |
| H4C11 |  |
| CDC42EP5 |  |
| CRYBG3 |  |
| PIK3R6 |  |
| GOLGA6L2 |  |
| MEF2C |  |
| CDK16 |  |
| DIS3 |  |
| USP18 |  |
| HRC |  |
| TCEA1 |  |
| TBCA |  |
| USP43 |  |
| ACVR2A |  |
| XRCC4 |  |
| PRDM2 |  |
| PTOV1 |  |
| HCLS1 |  |
| ABCC3 |  |
| HHIP |  |
| IL12A |  |
| PTPN12 |  |
| SEC31A |  |
| CERS3 |  |
| STRN |  |
| ZBTB48 |  |
| PDE4D |  |
| SCN8A |  |
| HCK |  |
| ABHD5 |  |
| NDUFS3 |  |
| CIITA |  |
| GALE |  |
| PARG |  |
| SYCP3 |  |
| DUSP2 |  |
| SNX1 |  |
| TIMM50 |  |
| NIPSNAP1 |  |
| USP44 |  |
| CCNY |  |
| PDLIM4 |  |
| TTF1 |  |
| UBE2M |  |
| CMIP |  |
| OSBP2 |  |
| THOC5 |  |
| ELAPOR1 |  |
| GDE1 |  |
| ZACN |  |
| CKMT1A |  |
| ISOC1 |  |
| PYGL |  |
| EIF5 |  |
| STING1 |  |
| KMT2B |  |
| DNAJC7 |  |
| ACTR1B |  |
| PHLDB2 |  |
| CST4 |  |
| TATDN1 |  |
| CROCC2 |  |
| GFER |  |
| PFKL |  |
| RAD23B |  |
| CALM2 |  |
| FAM20C |  |
| NR1I3 |  |
| OPTN |  |
| PYCR1 |  |
| RPA2 |  |
| ACTG2 |  |
| ADAMTS4 |  |
| BRCC3 |  |
| CUL2 |  |
| DUT |  |
| MFN1 |  |
| RPL26 |  |
| ABCF1 |  |
| COX5B |  |
| POLR2C |  |
| FBXO32 |  |
| RAB4A |  |
| SEC23B |  |
| MT3 |  |
| OPN4 |  |
| NACC1 |  |
| STMN2 |  |
| TNFRSF19 |  |
| CERS6 |  |
| CPSF4 |  |
| ITLN1 |  |
| NEUROG2 |  |
| NOLC1 |  |
| RBM17 |  |
| RIN1 |  |
| STAB1 |  |
| THSD4 |  |
| SLC25A38 |  |
| ANXA9 |  |
| DIMT1 |  |
| HCAR1 |  |
| KCNE4 |  |
| NRBF2 |  |
| ARHGDIG |  |
| GTF2F1 |  |
| CARD16 |  |
| CPSF2 |  |
| HNRNPUL2 |  |
| NOP16 |  |
| UBXN2A |  |
| NME9 |  |
| RNF185 |  |
| ZNF469 |  |
| USP51 |  |
| TMEM45B |  |
| ZNF382 |  |
| IQANK1 |  |
| HSD17B2 |  |
| PDHX |  |
| RAMP2 |  |
| COL7A1 |  |
| HTRA1 |  |
| TRIB3 |  |
| MRC1 |  |
| SLC38A3 |  |
| XCR1 |  |
| CLDND1 |  |
| MKRN1 |  |
| H2BC11 |  |
| H2BC12 |  |
| CD99L2 |  |
| PRUNE2 |  |
| PLA2G7 |  |
| GAD1 |  |
| NCF2 |  |
| APOB |  |
| TNFRSF21 |  |
| IL21 |  |
| MID1 |  |
| ROBO2 |  |
| UQCRC1 |  |
| FAF1 |  |
| SLC39A7 |  |
| SUV39H2 |  |
| UBQLN1 |  |
| ECI2 |  |
| ST8SIA2 |  |
| KPNA4 |  |
| MLLT10 |  |
| RAPGEF2 |  |
| APOM |  |
| MBOAT7 |  |
| NCAM2 |  |
| ST6GALNAC1 |  |
| STK38L |  |
| ATOH1 |  |
| H4C3 |  |
| PES1 |  |
| TGOLN2 |  |
| ZBTB24 |  |
| ZFP57 |  |
| NPNT |  |
| PPP1R7 |  |
| RAB5C |  |
| RFC3 |  |
| ARHGAP10 |  |
| ATG9B |  |
| ATP5IF1 |  |
| PDLIM2 |  |
| SLC9A8 |  |
| THEM4 |  |
| DACH2 |  |
| ODAM |  |
| RAB13 |  |
| TRIM69 |  |
| DNAJC9 |  |
| EPN3 |  |
| H4C5 |  |
| HEG1 |  |
| LAMTOR1 |  |
| RBM38 |  |
| RPL22L1 |  |
| FTSJ3 |  |
| SARNP |  |
| STON2 |  |
| ARHGAP25 |  |
| CLEC5A |  |
| MOSPD2 |  |
| H2AC12 |  |
| H4C8 |  |
| PRRX2 |  |
| TMEM41A |  |
| GASK1B |  |
| GOLT1B |  |
| H4C2 |  |
| H4C4 |  |
| ROMO1 |  |
| RPRD1A |  |
| FCGR3B |  |
| SMIM26 |  |
| CA12 |  |
| ADORA2A |  |
| HTRA2 |  |
| BMX |  |
| BANF1 |  |
| CDT1 |  |
| FOLR2 |  |
| FGF18 |  |
| KLK15 |  |
| CAPN6 |  |
| MYL9 |  |
| PLCG2 |  |
| PCBD1 |  |
| AGPS |  |
| HRH2 |  |
| AFF2 |  |
| RAB11B |  |
| HYDIN |  |
| KLRB1 |  |
| PTPN4 |  |
| SPART |  |
| WDR62 |  |
| IST1 |  |
| PARP9 |  |
| BCL2L12 |  |
| EMSY |  |
| PEG3 |  |
| AURKAIP1 |  |
| RASGRF2 |  |
| STARD10 |  |
| VEZF1 |  |
| CCL14 |  |
| E2F8 |  |
| ZNF503 |  |
| CACUL1 |  |
| SDC3 |  |
| TOPBP1 |  |
| HSD17B1 |  |
| SHBG |  |
| NCR3 |  |
| SLC5A5 |  |
| TRPM2 |  |
| BLMH |  |
| PKP2 |  |
| RANBP9 |  |
| SRSF11 |  |
| LCN1 |  |
| GIPC2 |  |
| PRRC2B |  |
| TMEM100 |  |
| PITX2 |  |
| ZNF687 |  |
| RMC1 |  |
| F12 |  |
| PCCB |  |
| PLOD1 |  |
| C4A |  |
| CD2 |  |
| DGKZ |  |
| DOCK2 |  |
| LY96 |  |
| MOGS |  |
| NEK1 |  |
| RCC1 |  |
| ARHGEF6 |  |
| DUSP3 |  |
| FBN2 |  |
| GSTZ1 |  |
| MYT1L |  |
| PDE3B |  |
| TNFSF15 |  |
| EFTUD2 |  |
| GATAD2B |  |
| GPD1L |  |
| NR2E3 |  |
| USP25 |  |
| BPNT2 |  |
| GMDS |  |
| SLC7A1 |  |
| ZMPSTE24 |  |
| AGFG1 |  |
| DLG5 |  |
| DNAJC13 |  |
| KCTD17 |  |
| MADCAM1 |  |
| PCDH9 |  |
| SYT11 |  |
| TNFAIP6 |  |
| CHCHD10 |  |
| COPE |  |
| COPG1 |  |
| CTCFL |  |
| DDX23 |  |
| EPHA6 |  |
| HERC1 |  |
| NCBP1 |  |
| PUS7 |  |
| SIX2 |  |
| ARHGAP15 |  |
| B3GALT5 |  |
| IFIT1 |  |
| NOVA2 |  |
| PPIL2 |  |
| SEMA3D |  |
| SEPTIN2 |  |
| ABCA8 |  |
| CIRBP |  |
| NSRP1 |  |
| BCL2L10 |  |
| FGF11 |  |
| HOXD11 |  |
| MPHOSPH8 |  |
| NDRG4 |  |
| NOP58 |  |
| ORAI2 |  |
| RAB6B |  |
| RIOK3 |  |
| RO60 |  |
| RPH3AL |  |
| TRIP6 |  |
| TSPAN2 |  |
| YPEL3 |  |
| ADGRL4 |  |
| CHPF |  |
| CLK3 |  |
| SNX17 |  |
| SRSF10 |  |
| USP42 |  |
| CMAS |  |
| NAF1 |  |
| NUDT5 |  |
| MBIP |  |
| MYCBP |  |
| PRRG4 |  |
| ZNF24 |  |
| ZNF407 |  |
| NELFE |  |
| SERTAD1 |  |
| CLDN12 |  |
| H2BC15 |  |
| MYEOV |  |
| TRIM62 |  |
| FAM83B |  |
| NNAT |  |
| MARCHF7 |  |
| RTCA |  |
| ZNF207 |  |
| ZNF319 |  |
| TP53I11 |  |
| CRACD |  |
| GOLGA8B |  |
| SPOCD1 |  |
| ZNF37A |  |
| HOXD10 |  |
| UGT1A7 |  |
| SCT |  |
| TRO |  |
| COMT |  |
| ESRRB |  |
| CDK19 |  |
| ASAH2 |  |
| RAD52 |  |
| RAD9A |  |
| UGT2B17 |  |
| CENPA |  |
| PRCC |  |
| SUCLA2 |  |
| KCNB2 |  |
| SGCD |  |
| HTR4 |  |
| EFHC1 |  |
| SH3TC2 |  |
| SLC25A29 |  |
| CNTN5 |  |
| DEGS2 |  |
| FBXO38 |  |
| MTMR10 |  |
| CIR1 |  |
| GCM1 |  |
| TMEM163 |  |
| INSC |  |
| SIRPA |  |
| GBF1 |  |
| NDN |  |
| PFAS |  |
| PRKRA |  |
| ONECUT1 |  |
| RNF31 |  |
| WDR48 |  |
| ANGPTL7 |  |
| PPP1R1A |  |
| GPS1 |  |
| ENKUR |  |
| RNFT1 |  |
| SPC25 |  |
| ARL6IP4 |  |
| TBX2 |  |
| PRF1 |  |
| CCNL1 |  |
| GRIK2 |  |
| PAK3 |  |
| CFB |  |
| MAPK13 |  |
| PSMA6 |  |
| GRM3 |  |
| RXRB |  |
| STT3A |  |
| DDOST |  |
| GALNT2 |  |
| LFNG |  |
| MBP |  |
| GGPS1 |  |
| ITGA8 |  |
| KHK |  |
| NAE1 |  |
| SALL1 |  |
| LMO2 |  |
| MYOCD |  |
| PSTPIP1 |  |
| QPCT |  |
| AP1S2 |  |
| C4BPA |  |
| HKDC1 |  |
| KLF1 |  |
| MRPS22 |  |
| OGA |  |
| PSMB2 |  |
| RANBP1 |  |
| SEC13 |  |
| SLC2A5 |  |
| SMARCA1 |  |
| SIL1 |  |
| ANKS1B |  |
| CD37 |  |
| HIP1R |  |
| HNRNPH2 |  |
| LMOD1 |  |
| NUP205 |  |
| RAB8A |  |
| TMEM106B |  |
| CHRDL1 |  |
| CLIC2 |  |
| HPR |  |
| KHDRBS3 |  |
| LGI4 |  |
| PTPRR |  |
| ST13 |  |
| MLLT3 |  |
| SEZ6L2 |  |
| SLC38A2 |  |
| TRIM8 |  |
| WDR4 |  |
| ANGPTL6 |  |
| C1D |  |
| SCGN |  |
| SF3A3 |  |
| A1BG |  |
| ATG14 |  |
| CADM4 |  |
| CDK3 |  |
| CHERP |  |
| COL5A3 |  |
| COPS7A |  |
| COX7C |  |
| FRMD4A |  |
| KIF20B |  |
| LSM14A |  |
| MID1IP1 |  |
| MYBPH |  |
| SUPT20H |  |
| ACOT8 |  |
| MCTS1 |  |
| MYL6B |  |
| NR2F6 |  |
| PF4V1 |  |
| SNRK |  |
| SYNE3 |  |
| ADAMTSL3 |  |
| SLBP |  |
| TEFM |  |
| TEX101 |  |
| B3GNT7 |  |
| CCNDBP1 |  |
| HINT2 |  |
| PRMT9 |  |
| RUSC1 |  |
| SEMA4F |  |
| STK17A |  |
| CBLN4 |  |
| DCAF10 |  |
| FBXL17 |  |
| GDPD5 |  |
| ZFAND4 |  |
| CCDC85C |  |
| SRRM3 |  |
| ZNFX1 |  |
| AMOTL2 |  |
| GLMP |  |
| RRP12 |  |
| UBE2Q1 |  |
| DZIP3 |  |
| FKBP9 |  |
| RNF183 |  |
| FBXL12 |  |
| FSD1 |  |
| GOLM2 |  |
| GOLT1A |  |
| NOCT |  |
| RWDD3 |  |
| TMEM200A |  |
| DCAF4 |  |
| JADE3 |  |
| SRSF8 |  |
| TMA16 |  |
| PLXND1 |  |
| RLN2 |  |
| CD38 |  |
| SLC12A2 |  |
| TNFSF13B |  |
| ASCC3 |  |
| EGR3 |  |
| HAPLN1 |  |
| STIL |  |
| GSDME |  |
| PKHD1 |  |
| APOBEC3A |  |
| GNLY |  |
| NME4 |  |
| TNS1 |  |
| SCNN1A |  |
| IFNAR2 |  |
| CDC42BPA |  |
| COPS2 |  |
| SENP3 |  |
| KPNA5 |  |
| RPRD2 |  |
| DNM1 |  |
| FGR |  |
| VIPR1 |  |
| PDE5A |  |
| FCGR1A |  |
| IDO2 |  |
| FOLR3 |  |
| PMAIP1 |  |
| SEC14L2 |  |
| CCNB3 |  |
| ITGAE |  |
| FBLN5 |  |

**Supplementary Table 2 Identification of autophagy- and metastasis- related genes.** The table lists autophagy-related genes and metastasis-related genes retrieved from the GeneCards database using the search terms “autophagy” and “metastasis”, respectively.

| **Supplementary Table 3. The results of the univariate Cox analysis.** | | | |
| --- | --- | --- | --- |
| **Gene** | **Hazard.Ratio** | **X95.CI** | **P.value** |
| RAB27A | 0.83 | 0.61-1.13 | 0.241 |
| LXN | 0.84 | 0.66-1.06 | 0.136 |
| RNF43 | 0.87 | 0.72-1.04 | 0.12 |
| SPP1 | 1.11 | 1.01-1.21 | 0.026 |
| MT2A | 1.03 | 0.88-1.2 | 0.73 |
| JCHAIN | 0.92 | 0.86-0.99 | 0.031 |
| MMP3 | 0.91 | 0.83-1.01 | 0.072 |
| IL6R | 0.93 | 0.68-1.27 | 0.651 |
| DNASE1L3 | 0.7 | 0.52-0.93 | 0.016 |
| CXCL8 | 0.95 | 0.86-1.05 | 0.338 |
| CFH | 1.03 | 0.82-1.29 | 0.797 |
| PDK4 | 1.07 | 0.88-1.3 | 0.478 |
| FOXF1 | 0.96 | 0.76-1.21 | 0.725 |
| TJP3 | 0.84 | 0.66-1.08 | 0.183 |
| SFXN3 | 1.35 | 0.96-1.89 | 0.082 |
| COL12A1 | 0.94 | 0.81-1.11 | 0.484 |
| WDR77 | 0.75 | 0.55-1.01 | 0.055 |
| RGS2 | 1.18 | 1-1.39 | 0.05 |
| DUSP1 | 0.99 | 0.84-1.16 | 0.87 |
| CALD1 | 1.1 | 0.94-1.29 | 0.239 |
| SNAI1 | 1.54 | 1.15-2.04 | 0.003 |
| EMP1 | 0.96 | 0.79-1.16 | 0.662 |
| CPNE8 | 0.92 | 0.66-1.28 | 0.604 |
| TPM1 | 0.77 | 0.59-0.99 | 0.041 |
| FKBP10 | 1.18 | 1-1.38 | 0.043 |
| SERPINH1 | 1.22 | 0.93-1.61 | 0.158 |
| FBXO32 | 1 | 0.8-1.25 | 0.977 |
| AQP1 | 1.11 | 0.96-1.3 | 0.17 |
| TXNIP | 1.1 | 0.9-1.33 | 0.349 |
| CDKN3 | 0.95 | 0.72-1.25 | 0.7 |
| TRAF5 | 1.21 | 0.93-1.56 | 0.153 |
| CD46 | 0.94 | 0.71-1.24 | 0.65 |
| RIOK3 | 1.13 | 0.84-1.54 | 0.415 |
| TDP2 | 0.97 | 0.75-1.25 | 0.792 |
| PLS1 | 0.85 | 0.66-1.08 | 0.184 |
| FGFRL1 | 1.04 | 0.86-1.27 | 0.663 |
| APPL2 | 0.87 | 0.58-1.28 | 0.469 |
| SYTL2 | 0.79 | 0.62-1 | 0.05 |
| PMAIP1 | 1.08 | 0.83-1.39 | 0.57 |
| HSPD1 | 0.93 | 0.69-1.25 | 0.627 |
| CCT6A | 1.05 | 0.7-1.59 | 0.801 |
| SIGMAR1 | 0.95 | 0.69-1.32 | 0.773 |
| ITGA2 | 0.81 | 0.63-1.04 | 0.104 |
| DDX21 | 0.9 | 0.68-1.18 | 0.437 |
| PUS1 | 1.11 | 0.77-1.62 | 0.569 |
| IFITM2 | 1.03 | 0.86-1.23 | 0.747 |
| SLC39A10 | 1.04 | 0.74-1.45 | 0.834 |
| HSD17B11 | 0.87 | 0.66-1.15 | 0.332 |

**Supplementary Table 3 The results of the univariate Cox analysis.** The table presents the results of univariate Cox analysis performed on the 48 overlapping genes to assess their association with OS in the TCGA-CRC cohort. Genes with a p-value < 0.05 were considered statistically significant.

| **Supplementary Table 4. The clinicopathological characteristics for CRC patients.** | | | |
| --- | --- | --- | --- |
| **Patient_ID** | **Sex** | **Age** | **Tumor stage** |
| CLM-003 | Male | 65 | T3N2M1 |
| CLM-007 | Male | 53 | T2N1M1 |
| CLM-012 | Male | 59 | T4N1M1 |
| CLM-028 | Female | 56 | T2N1M1 |
| CLM-033 | Female | 61 | T3N2M1 |
| CRC-011 | Male | 57 | T3N2M0 |
| CRC-012 | Male | 69 | T3N1M0 |
| CRC-013 | Male | 70 | T2N1M0 |
| CRC-014 | Male | 66 | T3N2M0 |

**Supplementary Table 4 The clinicopathological characteristics of CRC patients.** The table summarizes Clinicopathological information of the patients from whom the clinical samples were obtained,including sex, age and tumor stage.
